# Supplementary material for: Parallel Reporter Assays Identify Altered Regulatory Role of rs684232 in Leading to Prostate Cancer Predisposition
Source: Int J Mol Sci. 2021 Aug 16;22(16):8792. doi: 10.3390/ijms22168792 (PMC8395720; doi:10.3390/ijms22168792)
Supplement: Supplementary file 1 [file ijms-22-08792-s001.zip › Supplementary Tables.xlsx]

## Sheet: Table S1
DATE ADDED TO CATALOG	PUBMEDID	FIRST AUTHOR	DATE	JOURNAL	LINK	STUDY	DISEASE/TRAIT	INITIAL SAMPLE SIZE	INITIAL SAMPLE SIZE	INITIAL SAMPLE SIZE	CHR_ID	CHR_POS	REPORTED GENE(S)	MAPPED_GENE	UPSTREAM_GENE_ID	DOWNSTREAM_GENE_ID	SNP_GENE_IDS	UPSTREAM_GENE_DISTANCE	DOWNSTREAM_GENE_DISTANCE	STRONGEST SNP-RISK ALLELE	SNPS	MERGED	SNP_ID_CURRENT	CONTEXT	INTERGENIC	RISK ALLELE FREQUENCY	P-VALUE	PVALUE_MLOG	P-VALUE (TEXT)	OR or BETA	95% CI (TEXT)	PLATFORM [SNPS PASSING QC]	CNV
2015-05-07	25217961	Al Olama AA	2014-09-14	Nat Genet	www.ncbi.nlm.nih.gov/pubmed/25217961	A meta-analysis of 87,040 individuals identifies 23 new susceptibility loci for prostate cancer.	Prostate cancer	34,379 European ancestry cases, 33,164 European ancestry controls, 5,327 African ancestry cases, 5,136 African ancestry controls, 2,563 Japanese ancestry cases, 4,391 Japanese ancestry controls, 1,034 Latino cases, 1,046 Latino controls	34,379 European ancestry cases, 33,164 European ancestry controls, 5,327 African ancestry cases, 5,136 African ancestry controls, 2,563 Japanese ancestry cases, 4,391 Japanese ancestry controls, 1,034 Latino cases, 1,047 Latino controls	34,379 European ancestry cases, 33,164 European ancestry controls, 5,327 African ancestry cases, 5,136 African ancestry controls, 2,563 Japanese ancestry cases, 4,391 Japanese ancestry controls, 1,034 Latino cases, 1,048 Latino controls	4	72989536	COX18	LOC107986286, LOC105377273			107986286, 105377273			rs10009409T	rs10009409	0	10009409	intergenic_variant	0	0.32	2e-10	9.69897	(EA)	1.09	[1.06-1.12]	Affymetrix, Illumina [up to 16852405] (imputed)	N
2012-03-31	22219177	Tao S	2012-01-04	Carcinogenesis	www.ncbi.nlm.nih.gov/pubmed/22219177	A genome-wide search for loci interacting with known prostate cancer risk-associated genetic variants.	Prostate cancer (SNP x SNP interaction)	4,723 European ancestry cases, 4,792 European ancestry controls	4,723 European ancestry cases, 4,793 European ancestry controls	4,723 European ancestry cases, 4,794 European ancestry controls	3 x 2	112779033 x 172446825	CD200R1L x ITAGA6	LOC101929694 - LOC100129297 x ITGA6						rs1002979T	rs1002979	0		intergenic_variant		NR	3e-06	5.52288		1.5873	[1.32-1.92]	Affymetrix, Illumina [1117531] (imputed)	N
2012-03-31	22219177	Tao S	2012-01-04	Carcinogenesis	www.ncbi.nlm.nih.gov/pubmed/22219177	A genome-wide search for loci interacting with known prostate cancer risk-associated genetic variants.	Prostate cancer (SNP x SNP interaction)	4,723 European ancestry cases, 4,792 European ancestry controls	4,723 European ancestry cases, 4,793 European ancestry controls	4,723 European ancestry cases, 4,794 European ancestry controls	4 x 8	113079800 x 126999692	ANK2 x NR	ANK2 x LOC105375751						rs10086908T	rs10086908	0		intron_variant		NR	2e-06	5.69897		1.36	[1.20-1.55]	Affymetrix, Illumina [1117531] (imputed)	N
2012-10-23	22923026	Cheng I	2012-08-24	Cancer Epidemiol Biomarkers Prev	www.ncbi.nlm.nih.gov/pubmed/22923026	Evaluating genetic risk for prostate cancer among Japanese and Latinos.	Prostate cancer	1,033 Japanese ancestry cases, 1,042 Japanese ancestry controls, 1,043 Latino cases, 1,057 Latino controls	1,033 Japanese ancestry cases, 1,042 Japanese ancestry controls, 1,043 Latino cases, 1,058 Latino controls	1,033 Japanese ancestry cases, 1,042 Japanese ancestry controls, 1,043 Latino cases, 1,059 Latino controls	8	127519892	NR	CASC8 - LOC105375754	727677	105375754		37753	144647	rs10090154T	rs10090154	0	10090154	intergenic_variant	1	0.08	3e-06	5.52288	(Latin American)	1.68	[1.35-2.09]	Illumina [528023]	N
2011-07-30	21743057	Schumacher FR	2011-07-08	Hum Mol Genet	www.ncbi.nlm.nih.gov/pubmed/21743057	Genome-wide association study identifies new prostate cancer susceptibility loci.	Prostate cancer	2,782 European ancestry cases, 4,458 European ancestry controls	2,782 European ancestry cases, 4,459 European ancestry controls	2,782 European ancestry cases, 4,460 European ancestry controls	8	127081052	intergenic	PCAT2, PRNCR1			103164619, 101867536			rs1016343T	rs1016343	0	1016343	non_coding_transcript_exon_variant	0	NR	4e-10	9.39794		1.31	[1.20-1.42]	Illumina [571243]	N
2011-08-22	21743467	Kote-Jarai Z	2011-07-10	Nat Genet	www.ncbi.nlm.nih.gov/pubmed/21743467	Seven prostate cancer susceptibility loci identified by a multi-stage genome-wide association study.	Prostate cancer	6,621 European ancestry cases, 6,939 European ancestry controls	6,621 European ancestry cases, 6,940 European ancestry controls	6,621 European ancestry cases, 6,941 European ancestry controls	2	85567174	GGCX, VAMP8, VAMP5, RNF181	GGCX - RN7SL126P	2677	106479268		5640	488	rs10187424T	rs10187424	0	10187424	intron_variant	1	0.59	3e-15	14.5229		1.09	[1.06-1.12]	NR [2600000] (imputed)	N
2012-03-31	22219177	Tao S	2012-01-04	Carcinogenesis	www.ncbi.nlm.nih.gov/pubmed/22219177	A genome-wide search for loci interacting with known prostate cancer risk-associated genetic variants.	Prostate cancer (SNP x SNP interaction)	4,723 European ancestry cases, 4,792 European ancestry controls	4,723 European ancestry cases, 4,793 European ancestry controls	4,723 European ancestry cases, 4,794 European ancestry controls	7 x 17	109363517 x 71112612	C7orf66 x NR	LOC646614 - LOC100421901 x CASC17						rs10277209C	rs10277209	0		intergenic_variant		NR	4e-06	5.39794		1.36	[1.19-1.55]	Affymetrix, Illumina [1117531] (imputed)	N
2012-12-11	23023329	Xu J	2012-09-30	Nat Genet	www.ncbi.nlm.nih.gov/pubmed/23023329	Genome-wide association study in Chinese men identifies two new prostate cancer risk loci at 9q31.2 and 19q13.4.	Prostate cancer	1,417 Han Chinese ancestry cases, 1,008 Han Chinese ancestry controls	1,417 Han Chinese ancestry cases, 1,009 Han Chinese ancestry controls	1,417 Han Chinese ancestry cases, 1,010 Han Chinese ancestry controls	19	54293995	LILRA3	MIR4752 - LILRA5	100616171	353514		11815	13075	rs103294C	rs103294	0	103294	3_prime_UTR_variant	1	0.238	5e-16	15.301		1.28	[1.21-1.36]	Illumina [587294]	N
2015-05-07	25217961	Al Olama AA	2014-09-14	Nat Genet	www.ncbi.nlm.nih.gov/pubmed/25217961	A meta-analysis of 87,040 individuals identifies 23 new susceptibility loci for prostate cancer.	Prostate cancer	34,379 European ancestry cases, 33,164 European ancestry controls, 5,327 African ancestry cases, 5,136 African ancestry controls, 2,563 Japanese ancestry cases, 4,391 Japanese ancestry controls, 1,034 Latino cases, 1,046 Latino controls	34,379 European ancestry cases, 33,164 European ancestry controls, 5,327 African ancestry cases, 5,136 African ancestry controls, 2,563 Japanese ancestry cases, 4,391 Japanese ancestry controls, 1,034 Latino cases, 1,047 Latino controls	34,379 European ancestry cases, 33,164 European ancestry controls, 5,327 African ancestry cases, 5,136 African ancestry controls, 2,563 Japanese ancestry cases, 4,391 Japanese ancestry controls, 1,034 Latino cases, 1,048 Latino controls	21	41529494	TMPRSS2	TMPRSS2 - LOC105372809	7113	105372809		21336	23310	rs1041449G	rs1041449	0	1041449	intron_variant	1	0.44	3e-08	7.52288		1.06	[1.04-1.08]	Affymetrix, Illumina [up to 16852405] (imputed)	N
2016-07-15	26034056	Hoffmann TJ	2015-06-01	Cancer Discov	www.ncbi.nlm.nih.gov/pubmed/26034056	A large multi-ethnic genome-wide association study of prostate cancer identifies novel risk variants and substantial ethnic differences.	Prostate cancer	6,406 European ancestry cases, 601 African American cases, 288 East Asian ancestry cases, 488 Latino cases30,866 European ancestry controls, 1,650 African American controls, 2,938 East Asian ancestry controls, 3,141 Latino controls	6,406 European ancestry cases, 601 African American cases, 288 East Asian ancestry cases, 488 Latino cases30,866 European ancestry controls, 1,650 African American controls, 2,938 East Asian ancestry controls, 3,142 Latino controls	6,406 European ancestry cases, 601 African American cases, 288 East Asian ancestry cases, 488 Latino cases30,866 European ancestry controls, 1,650 African American controls, 2,938 East Asian ancestry controls, 3,143 Latino controls	7	27936944	NR	JAZF1			221895			rs10486567G	rs10486567	0	10486567	intron_variant	0	0.77	3e-11	10.5229		1.17	[1.12-1.22]	Affymetrix [up to 19977088] (imputed)	N
2008-09-17	17903305	Murabito JM	2007-09-19	BMC Med Genet	www.ncbi.nlm.nih.gov/pubmed/17903305	A genome-wide association study of breast and prostate cancer in the NHLBI's Framingham Heart Study.	Prostate cancer	59 cases, 558 controls	60 cases, 558 controls	61 cases, 558 controls	6	51801833	PKHD1	PKHD1			5314			rs10498792C	rs10498792	0	10498792	intron_variant	0	NR	3e-06	5.52288				Affymetrix [70897]	N
2012-10-23	22923026	Cheng I	2012-08-24	Cancer Epidemiol Biomarkers Prev	www.ncbi.nlm.nih.gov/pubmed/22923026	Evaluating genetic risk for prostate cancer among Japanese and Latinos.	Prostate cancer	1,033 Japanese ancestry cases, 1,042 Japanese ancestry controls, 1,043 Latino cases, 1,057 Latino controls	1,033 Japanese ancestry cases, 1,042 Japanese ancestry controls, 1,043 Latino cases, 1,058 Latino controls	1,033 Japanese ancestry cases, 1,042 Japanese ancestry controls, 1,043 Latino cases, 1,059 Latino controls	8	23676505	NR	LOC107986930			107986930			rs10503733T	rs10503733	0	10503733	downstream_gene_variant	0	NR	8e-08	7.09691	(Japanese and Latin American)	1.29	NR	Illumina [528023]	N
2017-05-25	28139693	Hoffmann TJ	2017-01-31	Nat Commun	www.ncbi.nlm.nih.gov/pubmed/28139693	Genome-wide association study of prostate-specific antigen levels identifies novel loci independent of prostate cancer.	Prostate-specific antigen levels	28,503 European ancestry individuals	28,504 European ancestry individuals	28,505 European ancestry individuals	8	127395198	MYC	CASC8			727677			rs10505477A	rs10505477	0	10505477	intron_variant	0	0.49	7e-21	20.1549		0.0525797	[0.042-0.064] unit increase	Affymetrix [10109774] (imputed)	N
2012-10-23	22923026	Cheng I	2012-08-24	Cancer Epidemiol Biomarkers Prev	www.ncbi.nlm.nih.gov/pubmed/22923026	Evaluating genetic risk for prostate cancer among Japanese and Latinos.	Prostate cancer	1,033 Japanese ancestry cases, 1,042 Japanese ancestry controls, 1,043 Latino cases, 1,057 Latino controls	1,033 Japanese ancestry cases, 1,042 Japanese ancestry controls, 1,043 Latino cases, 1,058 Latino controls	1,033 Japanese ancestry cases, 1,042 Japanese ancestry controls, 1,043 Latino cases, 1,059 Latino controls	8	127112950	NR	PRNCR1 - LOC105375752	101867536	105375752		20355	27108	rs10505483T	rs10505483	0	10505483	intron_variant	1	NR	7e-15	14.1549	(Japanese and Latin American)	1.73	NR	Illumina [528023]	N
2016-02-12	25939597	Berndt SI	2015-05-05	Nat Commun	www.ncbi.nlm.nih.gov/pubmed/25939597	Two susceptibility loci identified for prostate cancer aggressiveness.	Prostate cancer	4,600 European ancestry cases, 2,941 European ancestry controls	4,600 European ancestry cases, 2,942 European ancestry controls	4,600 European ancestry cases, 2,943 European ancestry controls	12	114228397	TBX5	LOC105369995 - LOC105369996	105369995	105369996		114908	9825	rs10774740G	rs10774740	0	10774740	intergenic_variant	1	0.6	3e-10	9.52288		1.14	[1.09-1.18]	Illumina [1531807] (imputed)	N
2011-01-13	21160077	Gudmundsson J	2010-12-15	Sci Transl Med	www.ncbi.nlm.nih.gov/pubmed/21160077	Genetic correction of PSA values using sequence variants associated with PSA levels.	Serum prostate-specific antigen levels	7,538 European ancestry individuals	2,373 European ancestry individuals	10q26.12	10	121274035	FGFR2	LINC01153 - LOC105378523	101927889	105378523		88069	17573	rs10788160A	rs10788160	0	10788160	intergenic_variant	1	0.31	5e-15	14.301		10.2	[NR] % increase	Illumina [304070]	N
2012-03-31	22219177	Tao S	2012-01-04	Carcinogenesis	www.ncbi.nlm.nih.gov/pubmed/22219177	A genome-wide search for loci interacting with known prostate cancer risk-associated genetic variants.	Prostate cancer (SNP x SNP interaction)	4,723 European ancestry cases, 4,792 European ancestry controls	4,723 European ancestry cases, 4,793 European ancestry controls	4,723 European ancestry cases, 4,794 European ancestry controls	10 x 19	12009817 x 38244973	UPF2 x NR	UPF2 x DPF1 - PPP1R14A						rs10795917A	rs10795917	0		intron_variant		NR	7e-07	6.1549		1.24	[1.14-1.36]	Affymetrix, Illumina [1117531] (imputed)	N
2016-07-15	26034056	Hoffmann TJ	2015-06-01	Cancer Discov	www.ncbi.nlm.nih.gov/pubmed/26034056	A large multi-ethnic genome-wide association study of prostate cancer identifies novel risk variants and substantial ethnic differences.	Prostate cancer	6,406 European ancestry cases, 601 African American cases, 288 East Asian ancestry cases, 488 Latino cases30,866 European ancestry controls, 1,650 African American controls, 2,938 East Asian ancestry controls, 3,141 Latino controls	6,406 European ancestry cases, 601 African American cases, 288 East Asian ancestry cases, 488 Latino cases30,866 European ancestry controls, 1,650 African American controls, 2,938 East Asian ancestry controls, 3,142 Latino controls	6,406 European ancestry cases, 601 African American cases, 288 East Asian ancestry cases, 488 Latino cases30,866 European ancestry controls, 1,650 African American controls, 2,938 East Asian ancestry controls, 3,143 Latino controls	12	49282227	NR	TUBA1C - LOC101927267	84790	101927267		8889	10404	rs10875943C	rs10875943	0	10875943	intergenic_variant	1	0.29	2e-06	5.69897	(European)	1.12	[1.07-1.18]	Affymetrix [up to 19977088] (imputed)	N
2012-03-31	22219177	Tao S	2012-01-04	Carcinogenesis	www.ncbi.nlm.nih.gov/pubmed/22219177	A genome-wide search for loci interacting with known prostate cancer risk-associated genetic variants.	Prostate cancer (SNP x SNP interaction)	4,723 European ancestry cases, 4,792 European ancestry controls	4,723 European ancestry cases, 4,793 European ancestry controls	4,723 European ancestry cases, 4,794 European ancestry controls	10 x 8	114567791 x 127472793	ABLIM1 x NR	ABLIM1 x CASC8						rs10885582C	rs10885582	0		intron_variant		NR	4e-06	5.39794		1.3699	[1.20-1.59]	Affymetrix, Illumina [1117531] (imputed)	N
2012-03-31	22219177	Tao S	2012-01-04	Carcinogenesis	www.ncbi.nlm.nih.gov/pubmed/22219177	A genome-wide search for loci interacting with known prostate cancer risk-associated genetic variants.	Prostate cancer (SNP x SNP interaction)	4,723 European ancestry cases, 4,792 European ancestry controls	4,723 European ancestry cases, 4,793 European ancestry controls	4,723 European ancestry cases, 4,794 European ancestry controls	2 x 11	198304372 x 69227200	PLCL1 x MYEOV	LOC101927619 x LOC105369366 - LOC105369367						rs10896449G	rs10896449	0		intron_variant		NR	4e-06	5.39794		1.24	[1.13-1.36]	Affymetrix, Illumina [1117531] (imputed)	N
2012-03-31	22219177	Tao S	2012-01-04	Carcinogenesis	www.ncbi.nlm.nih.gov/pubmed/22219177	A genome-wide search for loci interacting with known prostate cancer risk-associated genetic variants.	Prostate cancer (SNP x SNP interaction)	4,723 European ancestry cases, 4,792 European ancestry controls	4,723 European ancestry cases, 4,793 European ancestry controls	4,723 European ancestry cases, 4,794 European ancestry controls	9 x 3	115068533 x 128319530	TNC x EEFSEC	TNC x EEFSEC						rs10934853A	rs10934853	0		intron_variant		NR	4e-06	5.39794		1.4925	[1.27-1.79]	Affymetrix, Illumina [1117531] (imputed)	N
2011-08-22	21743467	Kote-Jarai Z	2011-07-10	Nat Genet	www.ncbi.nlm.nih.gov/pubmed/21743467	Seven prostate cancer susceptibility loci identified by a multi-stage genome-wide association study.	Prostate cancer	6,621 European ancestry cases, 6,939 European ancestry controls	6,621 European ancestry cases, 6,940 European ancestry controls	6,621 European ancestry cases, 6,941 European ancestry controls	3	170412314	CLDN11, SKIL	SKIL - CLDN11	6498	5010		15465	6551	rs10936632A	rs10936632	0	10936632	intron_variant	1	0.52	7e-22	21.1549		1.11	[1.08-1.14]	NR [2600000] (imputed)	N
2012-03-31	22219177	Tao S	2012-01-04	Carcinogenesis	www.ncbi.nlm.nih.gov/pubmed/22219177	A genome-wide search for loci interacting with known prostate cancer risk-associated genetic variants.	Prostate cancer (SNP x SNP interaction)	4,723 European ancestry cases, 4,792 European ancestry controls	4,723 European ancestry cases, 4,793 European ancestry controls	4,723 European ancestry cases, 4,794 European ancestry controls	5 x 10	57834991 x 125008303	ACTBL2 x CTBP2	LOC101928505 - LOC101928539 x CTBP2						rs10940579C	rs10940579	0		intergenic_variant		NR	4e-06	5.39794		1.32	[1.18-1.49]	Affymetrix, Illumina [1117531] (imputed)	N
2016-07-15	26034056	Hoffmann TJ	2015-06-01	Cancer Discov	www.ncbi.nlm.nih.gov/pubmed/26034056	A large multi-ethnic genome-wide association study of prostate cancer identifies novel risk variants and substantial ethnic differences.	Prostate cancer	6,406 European ancestry cases, 601 African American cases, 288 East Asian ancestry cases, 488 Latino cases30,866 European ancestry controls, 1,650 African American controls, 2,938 East Asian ancestry controls, 3,141 Latino controls	6,406 European ancestry cases, 601 African American cases, 288 East Asian ancestry cases, 488 Latino cases30,866 European ancestry controls, 1,650 African American controls, 2,938 East Asian ancestry controls, 3,142 Latino controls	6,406 European ancestry cases, 601 African American cases, 288 East Asian ancestry cases, 488 Latino cases30,866 European ancestry controls, 1,650 African American controls, 2,938 East Asian ancestry controls, 3,143 Latino controls	10	46046326	NR	MSMB - RPL23AP61	4477	728484		57	16924	rs10993994T	rs10993994	0	10993994	upstream_gene_variant	1	0.401	7e-21	20.1549		1.21	[1.16-1.25]	Affymetrix [up to 19977088] (imputed)	N
2017-05-25	28139693	Hoffmann TJ	2017-01-31	Nat Commun	www.ncbi.nlm.nih.gov/pubmed/28139693	Genome-wide association study of prostate-specific antigen levels identifies novel loci independent of prostate cancer.	Prostate-specific antigen levels	28,503 European ancestry individuals	28,504 European ancestry individuals	28,505 European ancestry individuals	12	114656455	TBX3	OSTF1P1 - TBX3	386654	6926		67656	13799	rs11067228A	rs11067228	0	11067228	downstream_gene_variant	1	0.54	1e-14	14		0.0439143	[0.033-0.055] unit increase	Affymetrix [10109774] (imputed)	N
2013-09-16	23535732	Eeles RA	2013-04-01	Nat Genet	www.ncbi.nlm.nih.gov/pubmed/23535732	Identification of 23 new prostate cancer susceptibility loci using the iCOGS custom genotyping array.	Prostate cancer	11,085 European ancestry cases, 11,463 European ancestry controls	11,085 European ancestry cases, 11,464 European ancestry controls	11,085 European ancestry cases, 11,465 European ancestry controls	8	26034626	EBF2	EBF2			64641			rs11135910T	rs11135910	0	11135910	intron_variant	0	0.16	8e-11	10.0969		1.11	[1.07-1.16]	Illumina [~ 2600000] (imputed)	N
2012-01-11	22130093	Nam RK	2011-12-01	Cancer Biol Ther	www.ncbi.nlm.nih.gov/pubmed/22130093	New variants at 10q26 and 15q21 are associated with aggressive prostate cancer in a genome-wide association study from a prostate biopsy screening cohort.	Prostate cancer	316 cases, 229 controls	317 cases, 229 controls	318 cases, 229 controls	10	121273005	intergenic	LINC01153 - LOC105378523	101927889	105378523		87039	18603	rs11199874G	rs11199874	0	11199874	intergenic_variant	1	NR	3e-10	9.52288				Affymetrix [443816]	N
2015-05-07	25217961	Al Olama AA	2014-09-14	Nat Genet	www.ncbi.nlm.nih.gov/pubmed/25217961	A meta-analysis of 87,040 individuals identifies 23 new susceptibility loci for prostate cancer.	Prostate cancer	34,379 European ancestry cases, 33,164 European ancestry controls, 5,327 African ancestry cases, 5,136 African ancestry controls, 2,563 Japanese ancestry cases, 4,391 Japanese ancestry controls, 1,034 Latino cases, 1,046 Latino controls	34,379 European ancestry cases, 33,164 European ancestry controls, 5,327 African ancestry cases, 5,136 African ancestry controls, 2,563 Japanese ancestry cases, 4,391 Japanese ancestry controls, 1,034 Latino cases, 1,047 Latino controls	34,379 European ancestry cases, 33,164 European ancestry controls, 5,327 African ancestry cases, 5,136 African ancestry controls, 2,563 Japanese ancestry cases, 4,391 Japanese ancestry controls, 1,034 Latino cases, 1,048 Latino controls	11	113936459	HTR3B	HTR3B			9177			rs11214775G	rs11214775	0	11214775	intron_variant	0	0.71	5e-08	7.30103		1.07	[1.04-1.09]	Affymetrix, Illumina [up to 16852405] (imputed)	N
2009-10-05	19767754	Gudmundsson J	2009-09-20	Nat Genet	www.ncbi.nlm.nih.gov/pubmed/19767754	Genome-wide association and replication studies identify four variants associated with prostate cancer susceptibility.	Prostate cancer	Up to 1,968 European ancestry cases, 35,382 European ancestry controls	Up to 1,968 European ancestry cases, 35,383 European ancestry controls	Up to 1,968 European ancestry cases, 35,384 European ancestry controls	11	69211113	intergenic	LOC105369366 - LOC105369367	105369366	105369367		33106	17636	rs11228565A	rs11228565	0	11228565	intergenic_variant	1	0.2	7e-12	11.1549		1.23	[1.16-1.31]	Illumina [310520]	N
2014-11-09	24740154	Lange EM	2014-04-16	PLoS One	www.ncbi.nlm.nih.gov/pubmed/24740154	Genome-wide association scan for variants associated with early-onset prostate cancer.	Prostate cancer (early onset)	931 European ancestry cases, 4,120 European ancestry controls	932 European ancestry cases, 4,120 European ancestry controls	933 European ancestry cases, 4,120 European ancestry controls	11	69241647	MYEOV	LOC105369367 - LOC105369368	105369367	105369368		6711	6354	rs11228583T	rs11228583	0	11228583	intergenic_variant	1	0.52	2e-07	6.69897		1.33	[1.22-1.44]	Illumina [2639562] (imputed)	N
2015-05-07	25217961	Al Olama AA	2014-09-14	Nat Genet	www.ncbi.nlm.nih.gov/pubmed/25217961	A meta-analysis of 87,040 individuals identifies 23 new susceptibility loci for prostate cancer.	Prostate cancer	34,379 European ancestry cases, 33,164 European ancestry controls, 5,327 African ancestry cases, 5,136 African ancestry controls, 2,563 Japanese ancestry cases, 4,391 Japanese ancestry controls, 1,034 Latino cases, 1,046 Latino controls	34,379 European ancestry cases, 33,164 European ancestry controls, 5,327 African ancestry cases, 5,136 African ancestry controls, 2,563 Japanese ancestry cases, 4,391 Japanese ancestry controls, 1,034 Latino cases, 1,047 Latino controls	34,379 European ancestry cases, 33,164 European ancestry controls, 5,327 African ancestry cases, 5,136 African ancestry controls, 2,563 Japanese ancestry cases, 4,391 Japanese ancestry controls, 1,034 Latino cases, 1,048 Latino controls	6	32433162	HLA-DRB6	BTNL2 - HLA-DRA	56244	3122		24283	6680	rs115306967G	rs115306967	1	3129859	intron_variant	1	0.65	3e-09	8.52288	(EA)	1.08	[1.06-1.11]	Affymetrix, Illumina [up to 16852405] (imputed)	N
2015-05-07	25217961	Al Olama AA	2014-09-14	Nat Genet	www.ncbi.nlm.nih.gov/pubmed/25217961	A meta-analysis of 87,040 individuals identifies 23 new susceptibility loci for prostate cancer.	Prostate cancer	34,379 European ancestry cases, 33,164 European ancestry controls, 5,327 African ancestry cases, 5,136 African ancestry controls, 2,563 Japanese ancestry cases, 4,391 Japanese ancestry controls, 1,034 Latino cases, 1,046 Latino controls	34,379 European ancestry cases, 33,164 European ancestry controls, 5,327 African ancestry cases, 5,136 African ancestry controls, 2,563 Japanese ancestry cases, 4,391 Japanese ancestry controls, 1,034 Latino cases, 1,047 Latino controls	34,379 European ancestry cases, 33,164 European ancestry controls, 5,327 African ancestry cases, 5,136 African ancestry controls, 2,563 Japanese ancestry cases, 4,391 Japanese ancestry controls, 1,034 Latino cases, 1,048 Latino controls	6	30105999	TRIM31	TRIM31, TRIM31-AS1			11074, 104533120			rs115457135A	rs115457135	1	7767188	intron_variant	0	0.22	1e-07	7		1.07	[1.05-1.10]	Affymetrix, Illumina [up to 16852405] (imputed)	N
2013-09-16	23535732	Eeles RA	2013-04-01	Nat Genet	www.ncbi.nlm.nih.gov/pubmed/23535732	Identification of 23 new prostate cancer susceptibility loci using the iCOGS custom genotyping array.	Prostate cancer	11,085 European ancestry cases, 11,463 European ancestry controls	11,085 European ancestry cases, 11,464 European ancestry controls	11,085 European ancestry cases, 11,465 European ancestry controls	11	102530930	MMP8, BIRC2, MMP10, MMP20, MMP27, MMP7, YAP1, BIRC3, TMEM123	MMP7 - MMP20	4316	9313		177	45905	rs11568818T	rs11568818	0	11568818	upstream_gene_variant	1	0.56	2e-11	10.699		1.1	[1.06-1.14]	Illumina [~ 2600000] (imputed)	N
2012-03-31	22219177	Tao S	2012-01-04	Carcinogenesis	www.ncbi.nlm.nih.gov/pubmed/22219177	A genome-wide search for loci interacting with known prostate cancer risk-associated genetic variants.	Prostate cancer (SNP x SNP interaction)	4,723 European ancestry cases, 4,792 European ancestry controls	4,723 European ancestry cases, 4,793 European ancestry controls	4,723 European ancestry cases, 4,794 European ancestry controls	11 x 4	15333700 x 105140377	INSC x TET2	INSC - LOC105376569 x LOC100288146 - TET2						rs11605083C	rs11605083	0		intergenic_variant		NR	4e-06	5.39794		1.28	[1.15-1.43]	Affymetrix, Illumina [1117531] (imputed)	N
2012-03-31	22219177	Tao S	2012-01-04	Carcinogenesis	www.ncbi.nlm.nih.gov/pubmed/22219177	A genome-wide search for loci interacting with known prostate cancer risk-associated genetic variants.	Prostate cancer (SNP x SNP interaction)	4,723 European ancestry cases, 4,792 European ancestry controls	4,723 European ancestry cases, 4,793 European ancestry controls	4,723 European ancestry cases, 4,794 European ancestry controls	15 x 8	96459423 x 127472793	NR2F2 x NR	RPL31P55 - RN7SKP254 x CASC8						rs11637980G	rs11637980	0		intergenic_variant		NR	2e-06	5.69897		1.4706	[1.27-1.72]	Affymetrix, Illumina [1117531] (imputed)	N
2016-07-15	26034056	Hoffmann TJ	2015-06-01	Cancer Discov	www.ncbi.nlm.nih.gov/pubmed/26034056	A large multi-ethnic genome-wide association study of prostate cancer identifies novel risk variants and substantial ethnic differences.	Prostate cancer	6,406 European ancestry cases, 601 African American cases, 288 East Asian ancestry cases, 488 Latino cases30,866 European ancestry controls, 1,650 African American controls, 2,938 East Asian ancestry controls, 3,141 Latino controls	6,406 European ancestry cases, 601 African American cases, 288 East Asian ancestry cases, 488 Latino cases30,866 European ancestry controls, 1,650 African American controls, 2,938 East Asian ancestry controls, 3,142 Latino controls	6,406 European ancestry cases, 601 African American cases, 288 East Asian ancestry cases, 488 Latino cases30,866 European ancestry controls, 1,650 African American controls, 2,938 East Asian ancestry controls, 3,143 Latino controls	17	37714971	NR	HNF1B, LOC105371754			6928, 105371754			rs11649743G	rs11649743	0	11649743	intron_variant	0	0.81	6e-07	6.22185		1.14	[1.08-1.20]	Affymetrix [up to 19977088] (imputed)	N
2013-09-16	23535732	Eeles RA	2013-04-01	Nat Genet	www.ncbi.nlm.nih.gov/pubmed/23535732	Identification of 23 new prostate cancer susceptibility loci using the iCOGS custom genotyping array.	Prostate cancer	11,085 European ancestry cases, 11,463 European ancestry controls	11,085 European ancestry cases, 11,464 European ancestry controls	11,085 European ancestry cases, 11,465 European ancestry controls	17	49267824	NGFR, PHB, PHOSPHO1, HOXB13, PRAC, SPOP, ZNF652, ABI3, B4GALNT2, FLJ40194, GNGT2, IGF2BP1	FLJ40194 - MIR6129	124871	102465137		9159	20522	rs11650494A	rs11650494	0	11650494	intergenic_variant	1	0.08	2e-09	8.69897		1.15	[1.09-1.22]	Illumina [~ 2600000] (imputed)	N
2013-01-10	23065704	Amin Al Olama A	2012-10-12	Hum Mol Genet	www.ncbi.nlm.nih.gov/pubmed/23065704	A meta-analysis of genome-wide association studies to identify prostate cancer susceptibility loci associated with aggressive and non-aggressive disease.	Prostate cancer	5,132 European ancestry non-aggressive cases, 5,953 European ancestry aggressive cases, 11,463 European ancestry controls	5,132 European ancestry non-aggressive cases, 5,953 European ancestry aggressive cases, 11,464 European ancestry controls	5,132 European ancestry non-aggressive cases, 5,953 European ancestry aggressive cases, 11,465 European ancestry controls	19	41479679	ATP5SL, CEACAM21	PCAT19			100505495			rs11672691G	rs11672691	0	11672691	intron_variant	0	NR	1e-08	8	(Aggressive)	1.11	[1.02-1.20]	Illumina [~ 2600000] (imputed)	N
2013-01-10	23065704	Amin Al Olama A	2012-10-12	Hum Mol Genet	www.ncbi.nlm.nih.gov/pubmed/23065704	A meta-analysis of genome-wide association studies to identify prostate cancer susceptibility loci associated with aggressive and non-aggressive disease.	Prostate cancer	5,132 European ancestry non-aggressive cases, 5,953 European ancestry aggressive cases, 11,463 European ancestry controls	5,132 European ancestry non-aggressive cases, 5,953 European ancestry aggressive cases, 11,464 European ancestry controls	5,132 European ancestry non-aggressive cases, 5,953 European ancestry aggressive cases, 11,465 European ancestry controls	22	40040969	TNRC6B	LOC100130899 - TNRC6B	100130899	23112		4392	3848	rs11704416C	rs11704416	0	11704416	3_prime_UTR_variant	1	NR	4e-07	6.39794	(All)	1.06	[1.02-1.10]	Illumina [~ 2600000] (imputed)	N
2012-03-31	22219177	Tao S	2012-01-04	Carcinogenesis	www.ncbi.nlm.nih.gov/pubmed/22219177	A genome-wide search for loci interacting with known prostate cancer risk-associated genetic variants.	Prostate cancer (SNP x SNP interaction)	4,723 European ancestry cases, 4,792 European ancestry controls	4,723 European ancestry cases, 4,793 European ancestry controls	4,723 European ancestry cases, 4,794 European ancestry controls	3 x 7	173125487 x 27936944	SPATA16 x JAZF1	SPATA16, LOC105374220 x JAZF1						rs11720607G	rs11720607	0		intron_variant		NR	5e-06	5.30103		1.3699	[1.20-1.59]	Affymetrix, Illumina [1117531] (imputed)	N
2013-09-16	23535732	Eeles RA	2013-04-01	Nat Genet	www.ncbi.nlm.nih.gov/pubmed/23535732	Identification of 23 new prostate cancer susceptibility loci using the iCOGS custom genotyping array.	Prostate cancer	11,085 European ancestry cases, 11,463 European ancestry controls	11,085 European ancestry cases, 11,464 European ancestry controls	11,085 European ancestry cases, 11,465 European ancestry controls	2	9977740	C2orf48, CYS1, GRHL1, KLF11, MIR4261, RRM2, TAF1B	GRHL1			29841			rs11902236T	rs11902236	0	11902236	intron_variant	0	0.27	3e-08	7.52288		1.07	[1.03-1.10]	Illumina [~ 2600000] (imputed)	N
2016-07-15	26034056	Hoffmann TJ	2015-06-01	Cancer Discov	www.ncbi.nlm.nih.gov/pubmed/26034056	A large multi-ethnic genome-wide association study of prostate cancer identifies novel risk variants and substantial ethnic differences.	Prostate cancer	6,406 European ancestry cases, 601 African American cases, 288 East Asian ancestry cases, 488 Latino cases30,866 European ancestry controls, 1,650 African American controls, 2,938 East Asian ancestry controls, 3,141 Latino controls	6,406 European ancestry cases, 601 African American cases, 288 East Asian ancestry cases, 488 Latino cases30,866 European ancestry controls, 1,650 African American controls, 2,938 East Asian ancestry controls, 3,142 Latino controls	6,406 European ancestry cases, 601 African American cases, 288 East Asian ancestry cases, 488 Latino cases30,866 European ancestry controls, 1,650 African American controls, 2,938 East Asian ancestry controls, 3,143 Latino controls	8	127519444	NR	CASC8 - LOC105375754	727677	105375754		37305	145095	rs11986220-A	rs11986220	0	11986220	intergenic_variant	1	0.099	2e-40	39.699	(European)	1.56	[1.46-1.67]	Affymetrix [up to 19977088] (imputed)	N
2015-05-07	25217961	Al Olama AA	2014-09-14	Nat Genet	www.ncbi.nlm.nih.gov/pubmed/25217961	A meta-analysis of 87,040 individuals identifies 23 new susceptibility loci for prostate cancer.	Prostate cancer	34,379 European ancestry cases, 33,164 European ancestry controls, 5,327 African ancestry cases, 5,136 African ancestry controls, 2,563 Japanese ancestry cases, 4,391 Japanese ancestry controls, 1,034 Latino cases, 1,046 Latino controls	34,379 European ancestry cases, 33,164 European ancestry controls, 5,327 African ancestry cases, 5,136 African ancestry controls, 2,563 Japanese ancestry cases, 4,391 Japanese ancestry controls, 1,034 Latino cases, 1,047 Latino controls	34,379 European ancestry cases, 33,164 European ancestry controls, 5,327 African ancestry cases, 5,136 African ancestry controls, 2,563 Japanese ancestry cases, 4,391 Japanese ancestry controls, 1,034 Latino cases, 1,048 Latino controls	16	71657426	PHLPP2	PHLPP2			23035			rs12051443A	rs12051443	0	12051443	intron_variant	0	0.34	3e-08	7.52288		1.06	[1.04-1.08]	Affymetrix, Illumina [up to 16852405] (imputed)	N
2009-12-29	19767753	Eeles RA	2009-09-20	Nat Genet	www.ncbi.nlm.nih.gov/pubmed/19767753	Identification of seven new prostate cancer susceptibility loci through a genome-wide association study.	Prostate cancer	1,854 European ancestry cases, 1,894 European ancestry controls	1,854 European ancestry cases, 1,895 European ancestry controls	1,854 European ancestry cases, 1,896 European ancestry controls	7	20954872	NR	LINC01162			104355138			rs12155172A	rs12155172	0	12155172	intron_variant	0	0.2	9e-06	5.04576		1.05	[1.00-1.10]	Illumina [541129]	N
2013-09-16	23535732	Eeles RA	2013-04-01	Nat Genet	www.ncbi.nlm.nih.gov/pubmed/23535732	Identification of 23 new prostate cancer susceptibility loci using the iCOGS custom genotyping array.	Prostate cancer	11,085 European ancestry cases, 11,463 European ancestry controls	11,085 European ancestry cases, 11,464 European ancestry controls	11,085 European ancestry cases, 11,465 European ancestry controls	1	154861707	ADAM15, ADAR, CKS1B, DCST1, DCST2, EFNA3, EFNA4, LOC10050, FLAD1, KCNN3, LENEP, LOC100505666, MIR4258, PBXIP1, DPM3, PYGO2, EFNA1, SHC1, SLC50A1, ZBTB7B, PMVK	KCNN3			3782			rs1218582G	rs1218582	0	1218582	intron_variant	0	0.45	2e-08	7.69897		1.06	[1.03-1.09]	Illumina [~ 2600000] (imputed)	N
2016-02-12	25939597	Berndt SI	2015-05-05	Nat Commun	www.ncbi.nlm.nih.gov/pubmed/25939597	Two susceptibility loci identified for prostate cancer aggressiveness.	Prostate cancer	4,600 European ancestry cases, 2,941 European ancestry controls	4,600 European ancestry cases, 2,942 European ancestry controls	4,600 European ancestry cases, 2,943 European ancestry controls	6	21330062	CDKAL1	CDKAL1 - LINC00581	54901	100874531		97658	155999	rs12198220T	rs12198220	0	12198220	intergenic_variant	1	0.74	2e-07	6.69897		1.12	[1.07鈥?.17]	Illumina [1531807] (imputed)	N
2012-03-31	22219177	Tao S	2012-01-04	Carcinogenesis	www.ncbi.nlm.nih.gov/pubmed/22219177	A genome-wide search for loci interacting with known prostate cancer risk-associated genetic variants.	Prostate cancer (SNP x SNP interaction)	4,723 European ancestry cases, 4,792 European ancestry controls	4,723 European ancestry cases, 4,793 European ancestry controls	4,723 European ancestry cases, 4,794 European ancestry controls	12 x 8	82770777 x 127112671	TMTC2 x NR	TMTC2 x PRNCR1 - LOC105375752						rs12317459A	rs12317459	0		intron_variant		NR	4e-06	5.39794		2.06	[1.52-2.80]	Affymetrix, Illumina [1117531] (imputed)	N
2012-03-31	22219177	Tao S	2012-01-04	Carcinogenesis	www.ncbi.nlm.nih.gov/pubmed/22219177	A genome-wide search for loci interacting with known prostate cancer risk-associated genetic variants.	Prostate cancer (SNP x SNP interaction)	4,723 European ancestry cases, 4,792 European ancestry controls	4,723 European ancestry cases, 4,793 European ancestry controls	4,723 European ancestry cases, 4,794 European ancestry controls	3 x 11	57409039 x 69167951	DNAH12 x MYEOV	DNAH12 x LOC338694, LOC105369366						rs12418451A	rs12418451	0		intron_variant		NR	1e-06	6		1.2658	[1.15-1.41]	Affymetrix, Illumina [1117531] (imputed)	N
2012-03-31	22219177	Tao S	2012-01-04	Carcinogenesis	www.ncbi.nlm.nih.gov/pubmed/22219177	A genome-wide search for loci interacting with known prostate cancer risk-associated genetic variants.	Prostate cancer (SNP x SNP interaction)	4,723 European ancestry cases, 4,792 European ancestry controls	4,723 European ancestry cases, 4,793 European ancestry controls	4,723 European ancestry cases, 4,794 European ancestry controls	14 x 11	20556460 x 69167951	RNASE9 x MYEOV	RNASE9 x LOC338694, LOC105369366						rs1243647A	rs1243647	0		exon_variant		NR	1e-06	6		1.3333	[1.19-1.49]	Affymetrix, Illumina [1117531] (imputed)	N
2015-05-07	25217961	Al Olama AA	2014-09-14	Nat Genet	www.ncbi.nlm.nih.gov/pubmed/25217961	A meta-analysis of 87,040 individuals identifies 23 new susceptibility loci for prostate cancer.	Prostate cancer	34,379 European ancestry cases, 33,164 European ancestry controls, 5,327 African ancestry cases, 5,136 African ancestry controls, 2,563 Japanese ancestry cases, 4,391 Japanese ancestry controls, 1,034 Latino cases, 1,046 Latino controls	34,379 European ancestry cases, 33,164 European ancestry controls, 5,327 African ancestry cases, 5,136 African ancestry controls, 2,563 Japanese ancestry cases, 4,391 Japanese ancestry controls, 1,034 Latino cases, 1,047 Latino controls	34,379 European ancestry cases, 33,164 European ancestry controls, 5,327 African ancestry cases, 5,136 African ancestry controls, 2,563 Japanese ancestry cases, 4,391 Japanese ancestry controls, 1,034 Latino cases, 1,048 Latino controls	20	50911385	ADNP	ADNP			23394			rs12480328T	rs12480328	0	12480328	intron_variant	0	0.93	2e-07	6.69897	(EA)	1.13	[1.08-1.17]	Affymetrix, Illumina [up to 16852405] (imputed)	N
2012-03-31	22219177	Tao S	2012-01-04	Carcinogenesis	www.ncbi.nlm.nih.gov/pubmed/22219177	A genome-wide search for loci interacting with known prostate cancer risk-associated genetic variants.	Prostate cancer (SNP x SNP interaction)	4,723 European ancestry cases, 4,792 European ancestry controls	4,723 European ancestry cases, 4,793 European ancestry controls	4,723 European ancestry cases, 4,794 European ancestry controls	3 x 7	108303 x 98187015	CHL1 x LMTK2	LOC107986040 - LOC101927174 x LMTK2						rs12485321A	rs12485321	0		intergenic_variant		NR	3e-06	5.52288		1.2346	[1.14-1.35]	Affymetrix, Illumina [1117531] (imputed)	N
2009-12-29	19767753	Eeles RA	2009-09-20	Nat Genet	www.ncbi.nlm.nih.gov/pubmed/19767753	Identification of seven new prostate cancer susceptibility loci through a genome-wide association study.	Prostate cancer	1,854 European ancestry cases, 1,894 European ancestry controls	1,854 European ancestry cases, 1,895 European ancestry controls	1,854 European ancestry cases, 1,896 European ancestry controls	4	94593458	PDLIM5	PDLIM5			10611			rs12500426A	rs12500426	0	12500426	intron_variant	0	0.46	1e-11	11		1.08	[1.05-1.12]	Illumina [541129]	N
2016-02-12	25939597	Berndt SI	2015-05-05	Nat Commun	www.ncbi.nlm.nih.gov/pubmed/25939597	Two susceptibility loci identified for prostate cancer aggressiveness.	Prostate cancer	4,600 European ancestry cases, 2,941 European ancestry controls	4,600 European ancestry cases, 2,942 European ancestry controls	4,600 European ancestry cases, 2,943 European ancestry controls	16	71997071	PKD1L3	PKD1L3			342372			rs12597458G	rs12597458	0	12597458	intron_variant	0	0.56	1e-07	7		1.11	[1.06鈥?.15]	Illumina [1531807] (imputed)	N
2012-03-31	22219177	Tao S	2012-01-04	Carcinogenesis	www.ncbi.nlm.nih.gov/pubmed/22219177	A genome-wide search for loci interacting with known prostate cancer risk-associated genetic variants.	Prostate cancer (SNP x SNP interaction)	4,723 European ancestry cases, 4,792 European ancestry controls	4,723 European ancestry cases, 4,793 European ancestry controls	4,723 European ancestry cases, 4,794 European ancestry controls	3 x 2	112779033 x 172446825	CD200R1L x ITAGA6	LOC101929694 - LOC100129297 x ITGA6						rs12621278G	rs12621278	0		intron_variant		NR	3e-06	5.52288		1.5873	[1.32-1.92]	Affymetrix, Illumina [1117531] (imputed)	N
2012-03-31	22219177	Tao S	2012-01-04	Carcinogenesis	www.ncbi.nlm.nih.gov/pubmed/22219177	A genome-wide search for loci interacting with known prostate cancer risk-associated genetic variants.	Prostate cancer (SNP x SNP interaction)	4,723 European ancestry cases, 4,792 European ancestry controls	4,723 European ancestry cases, 4,793 European ancestry controls	4,723 European ancestry cases, 4,794 European ancestry controls	22 x 11	40258272 x 2212344	TNRC6B x IGF2, IGF2AS, INS, TH	TNRC6B x TH - ASCL2						rs12628051C	rs12628051	0		intron_variant		NR	3e-06	5.52288		1.3	[1.17-1.46]	Affymetrix, Illumina [1117531] (imputed)	N
2010-09-11	20676098	Takata R	2010-08-01	Nat Genet	www.ncbi.nlm.nih.gov/pubmed/20676098	Genome-wide association study identifies five new susceptibility loci for prostate cancer in the Japanese population.	Prostate cancer	1,583 Japanese ancestry cases, 3,386 Japanese ancestry controls	1,583 Japanese ancestry cases, 3,387 Japanese ancestry controls	1,583 Japanese ancestry cases, 3,388 Japanese ancestry controls	5	1895715	intergenic	CTD-2194D22.4			101929081			rs12653946T	rs12653946	0	12653946	intron_variant	0	0.44	4e-18	17.3979		1.26	[1.20-1.33]	Illumina [510687]	N
2012-03-31	22219177	Tao S	2012-01-04	Carcinogenesis	www.ncbi.nlm.nih.gov/pubmed/22219177	A genome-wide search for loci interacting with known prostate cancer risk-associated genetic variants.	Prostate cancer (SNP x SNP interaction)	4,723 European ancestry cases, 4,792 European ancestry controls	4,723 European ancestry cases, 4,793 European ancestry controls	4,723 European ancestry cases, 4,794 European ancestry controls	9 x 8	8012418 x 127472793	C9orf123 x NR	LOC105375971 - PTPRD x CASC8						rs12682851G	rs12682851	0		intergenic_variant		NR	2e-06	5.69897		1.3889	[1.22-1.59]	Affymetrix, Illumina [1117531] (imputed)	N
2013-09-16	23535732	Eeles RA	2013-04-01	Nat Genet	www.ncbi.nlm.nih.gov/pubmed/23535732	Identification of 23 new prostate cancer susceptibility loci using the iCOGS custom genotyping array.	Prostate cancer	11,085 European ancestry cases, 11,463 European ancestry controls	11,085 European ancestry cases, 11,464 European ancestry controls	11,085 European ancestry cases, 11,465 European ancestry controls	12	114247766	TBX5, LOC255480	LOC105369996 - TBX5	105369996	6910		5586	106145	rs1270884A	rs1270884	0	1270884	intergenic_variant	1	0.49	7e-11	10.1549		1.07	[1.04-1.10]	Illumina [~ 2600000] (imputed)	N
2011-08-22	21743467	Kote-Jarai Z	2011-07-10	Nat Genet	www.ncbi.nlm.nih.gov/pubmed/21743467	Seven prostate cancer susceptibility loci identified by a multi-stage genome-wide association study.	Prostate cancer	6,621 European ancestry cases, 6,939 European ancestry controls	6,621 European ancestry cases, 6,940 European ancestry controls	6,621 European ancestry cases, 6,941 European ancestry controls	6	31150734	CCHCR1	CCHCR1			54535			rs130067G	rs130067	0	130067	exon_variant	0	0.21	3e-08	7.52288		1.05	[1.02-1.09]	NR [2600000] (imputed)	N
2012-03-31	22219177	Tao S	2012-01-04	Carcinogenesis	www.ncbi.nlm.nih.gov/pubmed/22219177	A genome-wide search for loci interacting with known prostate cancer risk-associated genetic variants.	Prostate cancer (SNP x SNP interaction)	4,723 European ancestry cases, 4,792 European ancestry controls	4,723 European ancestry cases, 4,793 European ancestry controls	4,723 European ancestry cases, 4,794 European ancestry controls	6 x 17	122961796 x 37714971	CLVS2 x HNF1B	ATP5LP2 - CLVS2 x LOC105371754, HNF1B						rs13192613T	rs13192613	0		intergenic_variant		NR	3e-06	5.52288		1.37	[1.20-1.56]	Affymetrix, Illumina [1117531] (imputed)	N
2016-07-15	26034056	Hoffmann TJ	2015-06-01	Cancer Discov	www.ncbi.nlm.nih.gov/pubmed/26034056	A large multi-ethnic genome-wide association study of prostate cancer identifies novel risk variants and substantial ethnic differences.	Prostate cancer	6,406 European ancestry cases, 601 African American cases, 288 East Asian ancestry cases, 488 Latino cases30,866 European ancestry controls, 1,650 African American controls, 2,938 East Asian ancestry controls, 3,141 Latino controls	6,406 European ancestry cases, 601 African American cases, 288 East Asian ancestry cases, 488 Latino cases30,866 European ancestry controls, 1,650 African American controls, 2,938 East Asian ancestry controls, 3,142 Latino controls	6,406 European ancestry cases, 601 African American cases, 288 East Asian ancestry cases, 488 Latino cases30,866 European ancestry controls, 1,650 African American controls, 2,938 East Asian ancestry controls, 3,143 Latino controls	8	127082911	NR	PRNCR1			101867536			rs13252298A	rs13252298	0	13252298	non_coding_transcript_exon_variant	0	0.71	2e-06	5.69897		1.11	[1.06-1.16]	Affymetrix [up to 19977088] (imputed)	N
2012-10-23	22923026	Cheng I	2012-08-24	Cancer Epidemiol Biomarkers Prev	www.ncbi.nlm.nih.gov/pubmed/22923026	Evaluating genetic risk for prostate cancer among Japanese and Latinos.	Prostate cancer	1,033 Japanese ancestry cases, 1,042 Japanese ancestry controls, 1,043 Latino cases, 1,057 Latino controls	1,033 Japanese ancestry cases, 1,042 Japanese ancestry controls, 1,043 Latino cases, 1,058 Latino controls	1,033 Japanese ancestry cases, 1,042 Japanese ancestry controls, 1,043 Latino cases, 1,059 Latino controls	8	127092098	NR	PRNCR1			101867536			rs13254738C	rs13254738	0	13254738	non_coding_transcript_exon_variant	0	0.54	4e-10	9.39794	(Japanese)	1.59	[1.38-1.84]	Illumina [528023]	N
2012-03-31	22219177	Tao S	2012-01-04	Carcinogenesis	www.ncbi.nlm.nih.gov/pubmed/22219177	A genome-wide search for loci interacting with known prostate cancer risk-associated genetic variants.	Prostate cancer (SNP x SNP interaction)	4,723 European ancestry cases, 4,792 European ancestry controls	4,723 European ancestry cases, 4,793 European ancestry controls	4,723 European ancestry cases, 4,794 European ancestry controls	8 x 11	123702482 x 2212344	ANXA13 x IGF2, IGF2AS, INS, TH	ANXA13 x TH - ASCL2						rs13258681C	rs13258681	0		intron_variant		NR	4e-06	5.39794		1.32	[1.17-1.48]	Affymetrix, Illumina [1117531] (imputed)	N
2012-03-31	22219177	Tao S	2012-01-04	Carcinogenesis	www.ncbi.nlm.nih.gov/pubmed/22219177	A genome-wide search for loci interacting with known prostate cancer risk-associated genetic variants.	Prostate cancer (SNP x SNP interaction)	4,723 European ancestry cases, 4,792 European ancestry controls	4,723 European ancestry cases, 4,793 European ancestry controls	4,723 European ancestry cases, 4,794 European ancestry controls	8 x 9	82161594 x 121665094	SNX16 x DAB2IC	LOC105375930 x DAB2IP						rs13264970C	rs13264970	0		upstream_gene_variant		NR	4e-06	5.39794		1.2987	[1.16-1.45]	Affymetrix, Illumina [1117531] (imputed)	N
2009-12-29	19767753	Eeles RA	2009-09-20	Nat Genet	www.ncbi.nlm.nih.gov/pubmed/19767753	Identification of seven new prostate cancer susceptibility loci through a genome-wide association study.	Prostate cancer	1,854 European ancestry cases, 1,894 European ancestry controls	1,854 European ancestry cases, 1,895 European ancestry controls	1,854 European ancestry cases, 1,896 European ancestry controls	X	51467205	NR	CXorf67 - NUDT11	340602	55190		58367	22806	rs1327301T	rs1327301	0	1327301	downstream_gene_variant	1	NR	2e-10	9.69897				Illumina [541129]	N
2010-09-11	20676098	Takata R	2010-08-01	Nat Genet	www.ncbi.nlm.nih.gov/pubmed/20676098	Genome-wide association study identifies five new susceptibility loci for prostate cancer in the Japanese population.	Prostate cancer	1,583 Japanese ancestry cases, 3,386 Japanese ancestry controls	1,583 Japanese ancestry cases, 3,387 Japanese ancestry controls	1,583 Japanese ancestry cases, 3,388 Japanese ancestry controls	2	20688505	C2orf43	C2orf43			60526			rs13385191G	rs13385191	0	13385191	intron_variant	0	0.44	8e-08	7.09691		1.15	[1.10-1.21]	Illumina [510687]	N
2012-03-31	22219177	Tao S	2012-01-04	Carcinogenesis	www.ncbi.nlm.nih.gov/pubmed/22219177	A genome-wide search for loci interacting with known prostate cancer risk-associated genetic variants.	Prostate cancer (SNP x SNP interaction)	4,723 European ancestry cases, 4,792 European ancestry controls	4,723 European ancestry cases, 4,793 European ancestry controls	4,723 European ancestry cases, 4,794 European ancestry controls	2 x 11	198304372 x 69227200	PLCL1 x MYEOV	LOC101927619 x LOC105369366 - LOC105369367						rs13398206C	rs13398206	0		intron_variant		NR	4e-06	5.39794		1.24	[1.13-1.36]	Affymetrix, Illumina [1117531] (imputed)	N
2018-08-14	29892016	Schumacher FR	2018-06-11	Nat Genet	www.ncbi.nlm.nih.gov/pubmed/29892016	Association analyses of more than 140,000 men identify 63 new prostate cancer susceptibility loci.	Prostate cancer	79,148 European ancestry cases, 61,106 European ancestry controls	NA	17q21.32	17	48728343	Intergenic	HOXB13			10481			rs138213197T	rs138213197	0	138213197	missense_variant	0	0.002	9e-63	62.0458		3.85	[3.29-4.51]	Illumina [20370935] (imputed)	N
2012-03-31	22219177	Tao S	2012-01-04	Carcinogenesis	www.ncbi.nlm.nih.gov/pubmed/22219177	A genome-wide search for loci interacting with known prostate cancer risk-associated genetic variants.	Prostate cancer (SNP x SNP interaction)	4,723 European ancestry cases, 4,792 European ancestry controls	4,723 European ancestry cases, 4,793 European ancestry controls	4,723 European ancestry cases, 4,794 European ancestry controls	10 x 8	114567791 x 127472793	ABLIM1 x NR	ABLIM1 x CASC8						rs1447295A	rs1447295	0		intron_variant		NR	4e-06	5.39794		1.3699	[1.20-1.59]	Affymetrix, Illumina [1117531] (imputed)	N
2010-09-11	20676098	Takata R	2010-08-01	Nat Genet	www.ncbi.nlm.nih.gov/pubmed/20676098	Genome-wide association study identifies five new susceptibility loci for prostate cancer in the Japanese population.	Prostate cancer	1,583 Japanese ancestry cases, 3,386 Japanese ancestry controls	1,583 Japanese ancestry cases, 3,387 Japanese ancestry controls	1,583 Japanese ancestry cases, 3,388 Japanese ancestry controls	8	127091692	intergenic	PRNCR1			101867536			rs1456315T	rs1456315	0	1456315	non_coding_transcript_exon_variant	0	NR	2e-29	28.699				Illumina [510687]	N
2009-12-29	19767753	Eeles RA	2009-09-20	Nat Genet	www.ncbi.nlm.nih.gov/pubmed/19767753	Identification of seven new prostate cancer susceptibility loci through a genome-wide association study.	Prostate cancer	1,854 European ancestry cases, 1,894 European ancestry controls	1,854 European ancestry cases, 1,895 European ancestry controls	1,854 European ancestry cases, 1,896 European ancestry controls	2	43326810	THADA	THADA			63892			rs1465618T	rs1465618	0	1465618	intron_variant	0	0.23	2e-08	7.69897		1.08	[1.03-1.12]	Illumina [541129]	N
2012-03-31	22219177	Tao S	2012-01-04	Carcinogenesis	www.ncbi.nlm.nih.gov/pubmed/22219177	A genome-wide search for loci interacting with known prostate cancer risk-associated genetic variants.	Prostate cancer (SNP x SNP interaction)	4,723 European ancestry cases, 4,792 European ancestry controls	4,723 European ancestry cases, 4,793 European ancestry controls	4,723 European ancestry cases, 4,794 European ancestry controls	6 x 8	29734733 x 23668950	LOC285830 x NKX3.1	HLA-F, HLA-F-AS1 x LOC107986930						rs1512268T	rs1512268	0		intron_variant		NR	2e-06	5.69897		1.24	[1.14-1.35]	Affymetrix, Illumina [1117531] (imputed)	N
2008-09-17	17903305	Murabito JM	2007-09-19	BMC Med Genet	www.ncbi.nlm.nih.gov/pubmed/17903305	A genome-wide association study of breast and prostate cancer in the NHLBI's Framingham Heart Study.	Prostate cancer	59 cases, 558 controls	60 cases, 558 controls	61 cases, 558 controls	13	103275657	intergenic	SLC10A2 - LOC105370338	6555	105370338		208811	15312	rs1529276A	rs1529276	0	1529276	intergenic_variant	1	NR	2e-06	5.69897				Affymetrix [70897]	N
2012-03-31	22219177	Tao S	2012-01-04	Carcinogenesis	www.ncbi.nlm.nih.gov/pubmed/22219177	A genome-wide search for loci interacting with known prostate cancer risk-associated genetic variants.	Prostate cancer (SNP x SNP interaction)	4,723 European ancestry cases, 4,792 European ancestry controls	4,723 European ancestry cases, 4,793 European ancestry controls	4,723 European ancestry cases, 4,794 European ancestry controls	8 x 9	82161594 x 121665094	SNX16 x DAB2IC	LOC105375930 x DAB2IP						rs1571801T	rs1571801	0		upstream_gene_variant		NR	4e-06	5.39794		1.2987	[1.16-1.45]	Affymetrix, Illumina [1117531] (imputed)	N
2012-03-31	22219177	Tao S	2012-01-04	Carcinogenesis	www.ncbi.nlm.nih.gov/pubmed/22219177	A genome-wide search for loci interacting with known prostate cancer risk-associated genetic variants.	Prostate cancer (SNP x SNP interaction)	4,723 European ancestry cases, 4,792 European ancestry controls	4,723 European ancestry cases, 4,793 European ancestry controls	4,723 European ancestry cases, 4,794 European ancestry controls	2 x 17	180176559 x 71112612	CWC22 x NR	LOC105373767 - LOC105373768 x CASC17						rs16867225A	rs16867225	0		intergenic_variant		NR	3e-06	5.52288		1.5625	[1.3-1.89]	Affymetrix, Illumina [1117531] (imputed)	N
2012-03-31	22219177	Tao S	2012-01-04	Carcinogenesis	www.ncbi.nlm.nih.gov/pubmed/22219177	A genome-wide search for loci interacting with known prostate cancer risk-associated genetic variants.	Prostate cancer (SNP x SNP interaction)	4,723 European ancestry cases, 4,792 European ancestry controls	4,723 European ancestry cases, 4,793 European ancestry controls	4,723 European ancestry cases, 4,794 European ancestry controls	12 x 8	82770777 x 127112671	TMTC2 x NR	TMTC2 x PRNCR1 - LOC105375752						rs16901979A	rs16901979	0		intron_variant		NR	4e-06	5.39794		2.06	[1.52-2.80]	Affymetrix, Illumina [1117531] (imputed)	N
2009-10-05	19767754	Gudmundsson J	2009-09-20	Nat Genet	www.ncbi.nlm.nih.gov/pubmed/19767754	Genome-wide association and replication studies identify four variants associated with prostate cancer susceptibility.	Prostate cancer	Up to 1,968 European ancestry cases, 35,382 European ancestry controls	Up to 1,968 European ancestry cases, 35,383 European ancestry controls	Up to 1,968 European ancestry cases, 35,384 European ancestry controls	8	127308101	intergenic	CASC21, CASC8			103021164, 727677			rs16902094G	rs16902094	0	16902094	intron_variant	0	0.15	6e-15	14.2218		1.21	[1.15-1.26]	Illumina [310520]	N
2016-07-15	26034056	Hoffmann TJ	2015-06-01	Cancer Discov	www.ncbi.nlm.nih.gov/pubmed/26034056	A large multiethnic genome-wide association study of prostate cancer identifies novel risk variants and substantial ethnic differences.	Prostate cancer	6,406 European ancestry cases, 601 African American cases, 288 East Asian ancestry cases, 488 Latino cases30,866 European ancestry controls, 1,650 African American controls, 2,938 East Asian ancestry controls, 3,141 Latino controls	4,599 European ancestry cases, 2,265 African American cases, 2,940 European ancestry controls, 2,414 African American controls	8q24.21	8	127328663	NR	CASC21, CASC8			103021164, 727677			rs16902104T	rs16902104	0	16902104	intron_variant	0	0.14	5e-10	9.30103	(European)	1.21	[1.14-1.28]	Affymetrix [up to 19977088] (imputed)	N
2012-03-31	22219177	Tao S	2012-01-04	Carcinogenesis	www.ncbi.nlm.nih.gov/pubmed/22219177	A genome-wide search for loci interacting with known prostate cancer risk-associated genetic variants.	Prostate cancer (SNP x SNP interaction)	4,723 European ancestry cases, 4,792 European ancestry controls	4,723 European ancestry cases, 4,793 European ancestry controls	4,723 European ancestry cases, 4,794 European ancestry controls	13 x 8	90213292 x 23668950	MIR622 x NKX3.1	FAR1P1 - KRT18P27 x LOC107986930						rs16944141A	rs16944141	0		intergenic_variant		NR	3e-06	5.52288		1.5385	[1.28-1.85]	Affymetrix, Illumina [1117531] (imputed)	N
2009-12-29	19767753	Eeles RA	2009-09-20	Nat Genet	www.ncbi.nlm.nih.gov/pubmed/19767753	Identification of seven new prostate cancer susceptibility loci through a genome-wide association study.	Prostate cancer	1,854 European ancestry cases, 1,894 European ancestry controls	1,854 European ancestry cases, 1,895 European ancestry controls	1,854 European ancestry cases, 1,896 European ancestry controls	4	94641726	PDLIM5	PDLIM5			10611			rs17021918T	rs17021918	0	17021918	intron_variant	0	0.65	4e-15	14.3979		1.11	[1.08-1.15]	Illumina [541129]	N
2012-10-23	22923026	Cheng I	2012-08-24	Cancer Epidemiol Biomarkers Prev	www.ncbi.nlm.nih.gov/pubmed/22923026	Evaluating genetic risk for prostate cancer among Japanese and Latinos.	Prostate cancer	1,033 Japanese ancestry cases, 1,042 Japanese ancestry controls, 1,043 Latino cases, 1,057 Latino controls	1,033 Japanese ancestry cases, 1,042 Japanese ancestry controls, 1,043 Latino cases, 1,058 Latino controls	1,033 Japanese ancestry cases, 1,042 Japanese ancestry controls, 1,043 Latino cases, 1,059 Latino controls	3	87085650	NR	LOC285232 - LINC00506	285232	100846978		32781	3630	rs17023900G	rs17023900	0	17023900	upstream_gene_variant	1	NR	6e-08	7.22185	(Japanese and Latin American)	1.41	NR	Illumina [528023]	N
2009-12-29	19767753	Eeles RA	2009-09-20	Nat Genet	www.ncbi.nlm.nih.gov/pubmed/19767753	Identification of seven new prostate cancer susceptibility loci through a genome-wide association study.	Prostate cancer	1,854 European ancestry cases, 1,894 European ancestry controls	1,854 European ancestry cases, 1,895 European ancestry controls	1,854 European ancestry cases, 1,896 European ancestry controls	3	87124174	NR	LINC00506			100846978			rs17181170G	rs17181170	0	17181170	intron_variant	0	NR	3e-08	7.52288				Illumina [541129]	N
2015-05-07	25217961	Al Olama AA	2014-09-14	Nat Genet	www.ncbi.nlm.nih.gov/pubmed/25217961	A meta-analysis of 87,040 individuals identifies 23 new susceptibility loci for prostate cancer.	Prostate cancer	34,379 European ancestry cases, 33,164 European ancestry controls, 5,327 African ancestry cases, 5,136 African ancestry controls, 2,563 Japanese ancestry cases, 4,391 Japanese ancestry controls, 1,034 Latino cases, 1,046 Latino controls	34,379 European ancestry cases, 33,164 European ancestry controls, 5,327 African ancestry cases, 5,136 African ancestry controls, 2,563 Japanese ancestry cases, 4,391 Japanese ancestry controls, 1,034 Latino cases, 1,047 Latino controls	34,379 European ancestry cases, 33,164 European ancestry controls, 5,327 African ancestry cases, 5,136 African ancestry controls, 2,563 Japanese ancestry cases, 4,391 Japanese ancestry controls, 1,034 Latino cases, 1,048 Latino controls	1	150685811	GOLPH3L	GOLPH3L			55204			rs17599629G	rs17599629	0	17599629	intron_variant	0	0.22	6e-11	10.2218	(EA)	1.1	[1.07-1.13]	Affymetrix, Illumina [up to 16852405] (imputed)	N
2014-11-09	24740154	Lange EM	2014-04-16	PLoS One	www.ncbi.nlm.nih.gov/pubmed/24740154	Genome-wide association scan for variants associated with early-onset prostate cancer.	Prostate cancer (early onset)	931 European ancestry cases, 4,120 European ancestry controls	932 European ancestry cases, 4,120 European ancestry controls	933 European ancestry cases, 4,120 European ancestry controls	19	50858501	KLK3	KLK3			354			rs17632542T	rs17632542	0	17632542	exon_variant	0	0.92	1e-07	7		1.85	[1.61-2.09]	Illumina [2639562] (imputed)	N
2015-05-07	25217961	Al Olama AA	2014-09-14	Nat Genet	www.ncbi.nlm.nih.gov/pubmed/25217961	A meta-analysis of 87,040 individuals identifies 23 new susceptibility loci for prostate cancer.	Prostate cancer	34,379 European ancestry cases, 33,164 European ancestry controls, 5,327 African ancestry cases, 5,136 African ancestry controls, 2,563 Japanese ancestry cases, 4,391 Japanese ancestry controls, 1,034 Latino cases, 1,046 Latino controls	34,379 European ancestry cases, 33,164 European ancestry controls, 5,327 African ancestry cases, 5,136 African ancestry controls, 2,563 Japanese ancestry cases, 4,391 Japanese ancestry controls, 1,034 Latino cases, 1,047 Latino controls	34,379 European ancestry cases, 33,164 European ancestry controls, 5,327 African ancestry cases, 5,136 African ancestry controls, 2,563 Japanese ancestry cases, 4,391 Japanese ancestry controls, 1,034 Latino cases, 1,048 Latino controls	9	22041999	CDKN2B-AS1	CDKN2B-AS1			100048912			rs17694493G	rs17694493	0	17694493	intron_variant	0	0.14	4e-08	7.39794	(EA)	1.1	[1.06-1.13]	Affymetrix, Illumina [up to 16852405] (imputed)	N
2015-05-07	25217961	Al Olama AA	2014-09-14	Nat Genet	www.ncbi.nlm.nih.gov/pubmed/25217961	A meta-analysis of 87,040 individuals identifies 23 new susceptibility loci for prostate cancer.	Prostate cancer	34,379 European ancestry cases, 33,164 European ancestry controls, 5,327 African ancestry cases, 5,136 African ancestry controls, 2,563 Japanese ancestry cases, 4,391 Japanese ancestry controls, 1,034 Latino cases, 1,046 Latino controls	34,379 European ancestry cases, 33,164 European ancestry controls, 5,327 African ancestry cases, 5,136 African ancestry controls, 2,563 Japanese ancestry cases, 4,391 Japanese ancestry controls, 1,034 Latino cases, 1,047 Latino controls	34,379 European ancestry cases, 33,164 European ancestry controls, 5,327 African ancestry cases, 5,136 African ancestry controls, 2,563 Japanese ancestry cases, 4,391 Japanese ancestry controls, 1,034 Latino cases, 1,048 Latino controls	1	205788696	SLC41A1	LOC105371702 - SLC41A1	105371702	254428		5073	397	rs1775148C	rs1775148	0	1775148	downstream_gene_variant	1	0.27	4e-08	7.39794		1.06	[1.04-1.08]	Affymetrix, Illumina [up to 16852405] (imputed)	N
2016-02-12	25939597	Berndt SI	2015-05-05	Nat Commun	www.ncbi.nlm.nih.gov/pubmed/25939597	Two susceptibility loci identified for prostate cancer aggressiveness.	Prostate cancer	4,600 European ancestry cases, 2,941 European ancestry controls	4,600 European ancestry cases, 2,942 European ancestry controls	4,600 European ancestry cases, 2,943 European ancestry controls	17	71110733	BC039327, CASC17	CASC17			101928165			rs17765344A	rs17765344	0	17765344	intron_variant	0	0.48	4e-21	20.3979		1.19	[1.15-1.23]	Illumina [1531807] (imputed)	N
2016-07-15	26034056	Hoffmann TJ	2015-06-01	Cancer Discov	www.ncbi.nlm.nih.gov/pubmed/26034056	A large multi-ethnic genome-wide association study of prostate cancer identifies novel risk variants and substantial ethnic differences.	Prostate cancer	6,406 European ancestry cases, 601 African American cases, 288 East Asian ancestry cases, 488 Latino cases30,866 European ancestry controls, 1,650 African American controls, 2,938 East Asian ancestry controls, 3,141 Latino controls	6,406 European ancestry cases, 601 African American cases, 288 East Asian ancestry cases, 488 Latino cases30,866 European ancestry controls, 1,650 African American controls, 2,938 East Asian ancestry controls, 3,142 Latino controls	6,406 European ancestry cases, 601 African American cases, 288 East Asian ancestry cases, 488 Latino cases30,866 European ancestry controls, 1,650 African American controls, 2,938 East Asian ancestry controls, 3,143 Latino controls	17	71112612	NR	CASC17			101928165			rs1859962G	rs1859962	0	1859962	intron_variant	0	0.48	2e-09	8.69897		1.13	[1.08-1.17]	Affymetrix [up to 19977088] (imputed)	N
2012-03-31	22219177	Tao S	2012-01-04	Carcinogenesis	www.ncbi.nlm.nih.gov/pubmed/22219177	A genome-wide search for loci interacting with known prostate cancer risk-associated genetic variants.	Prostate cancer (SNP x SNP interaction)	4,723 European ancestry cases, 4,792 European ancestry controls	4,723 European ancestry cases, 4,793 European ancestry controls	4,723 European ancestry cases, 4,794 European ancestry controls	1 x 19	29712815 x 38244973	PTPRU x NR	LOC107984934 - LOC101929406 x DPF1 - PPP1R14A						rs1866967A	rs1866967	0		upstream_gene_variant		NR	5e-06	5.30103		1.2195	[1.12-1.33]	Affymetrix, Illumina [1117531] (imputed)	N
2015-05-15	23104005	Gudmundsson J	2012-10-28	Nat Genet	www.ncbi.nlm.nih.gov/pubmed/23104005	A study based on whole-genome sequencing yields a rare variant at 8q24 associated with prostate cancer.	Prostate cancer	5,141 European ancestry cases, 54,444 European ancestry controls	5,141 European ancestry cases, 54,445 European ancestry controls	5,141 European ancestry cases, 54,446 European ancestry controls	8	127179427	HOXB13	LOC105375752 - CASC19	105375752	103021165		9909	8358	rs188140481A	rs188140481	0	188140481	non_coding_transcript_exon_variant	1	0.054	6e-34	33.2218		2.9	[2.44-3.44]	Illumina [~ 32500000] (imputed)	N
2013-09-16	23535732	Eeles RA	2013-04-01	Nat Genet	www.ncbi.nlm.nih.gov/pubmed/23535732	Identification of 23 new prostate cancer susceptibility loci using the iCOGS custom genotyping array.	Prostate cancer	11,085 European ancestry cases, 11,463 European ancestry controls	11,085 European ancestry cases, 11,464 European ancestry controls	11,085 European ancestry cases, 11,465 European ancestry controls	4	73483441	COX18, AFM, RASSF6, ALB, AFP, ANKRD17, LOC72804, LOC728040	AFM			173			rs1894292G	rs1894292	0	1894292	intron_variant	0	0.52	5e-13	12.301		1.1	[1.06-1.12]	Illumina [~ 2600000] (imputed)	N
2012-03-31	22219177	Tao S	2012-01-04	Carcinogenesis	www.ncbi.nlm.nih.gov/pubmed/22219177	A genome-wide search for loci interacting with known prostate cancer risk-associated genetic variants.	Prostate cancer (SNP x SNP interaction)	4,723 European ancestry cases, 4,792 European ancestry controls	4,723 European ancestry cases, 4,793 European ancestry controls	4,723 European ancestry cases, 4,794 European ancestry controls	3 x 11	57409039 x 69167951	DNAH12 x MYEOV	DNAH12 x LOC338694, LOC105369366						rs1916284T	rs1916284	0		intron_variant		NR	1e-06	6		1.2658	[1.15-1.41]	Affymetrix, Illumina [1117531] (imputed)	N
2013-09-16	23535732	Eeles RA	2013-04-01	Nat Genet	www.ncbi.nlm.nih.gov/pubmed/23535732	Identification of 23 new prostate cancer susceptibility loci using the iCOGS custom genotyping array.	Prostate cancer	11,085 European ancestry cases, 11,463 European ancestry controls	11,085 European ancestry cases, 11,464 European ancestry controls	11,085 European ancestry cases, 11,465 European ancestry controls	6	153119944	RGS17, FBXO5, MTRF1L	RGS17			26575			rs1933488A	rs1933488	0	1933488	intron_variant	0	0.59	4e-18	17.3979		1.12	[1.09-1.15]	Illumina [~ 2600000] (imputed)	N
2010-09-11	20676098	Takata R	2010-08-01	Nat Genet	www.ncbi.nlm.nih.gov/pubmed/20676098	Genome-wide association study identifies five new susceptibility loci for prostate cancer in the Japanese population.	Prostate cancer	1,583 Japanese ancestry cases, 3,386 Japanese ancestry controls	1,583 Japanese ancestry cases, 3,387 Japanese ancestry controls	1,583 Japanese ancestry cases, 3,388 Japanese ancestry controls	6	41568689	FOXP4	FOXP4			116113			rs1983891T	rs1983891	0	1983891	intron_variant	0	0.41	8e-08	7.09691		1.15	[1.09-1.21]	Illumina [510687]	N
2014-11-09	24740154	Lange EM	2014-04-16	PLoS One	www.ncbi.nlm.nih.gov/pubmed/24740154	Genome-wide association scan for variants associated with early-onset prostate cancer.	Prostate cancer (early onset)	931 European ancestry cases, 4,120 European ancestry controls	932 European ancestry cases, 4,120 European ancestry controls	933 European ancestry cases, 4,120 European ancestry controls	17	37736310	TCF2	HNF1B			6928			rs2005705G	rs2005705	0	2005705	intron_variant	0	0.56	1e-06	6		1.35	[1.23-1.47]	Illumina [2639562] (imputed)	N
2011-08-22	21743467	Kote-Jarai Z	2011-07-10	Nat Genet	www.ncbi.nlm.nih.gov/pubmed/21743467	Seven prostate cancer susceptibility loci identified by a multi-stage genome-wide association study.	Prostate cancer	6,621 European ancestry cases, 6,939 European ancestry controls	6,621 European ancestry cases, 6,940 European ancestry controls	6,621 European ancestry cases, 6,941 European ancestry controls	5	44365443	FGF10	FGF10			2255			rs2121875C	rs2121875	0	2121875	intron_variant	0	0.34	4e-08	7.39794		1.05	[1.02-1.08]	NR [2600000] (imputed)	N
2012-03-31	22219177	Tao S	2012-01-04	Carcinogenesis	www.ncbi.nlm.nih.gov/pubmed/22219177	A genome-wide search for loci interacting with known prostate cancer risk-associated genetic variants.	Prostate cancer (SNP x SNP interaction)	4,723 European ancestry cases, 4,792 European ancestry controls	4,723 European ancestry cases, 4,793 European ancestry controls	4,723 European ancestry cases, 4,794 European ancestry controls	8 x 9	78044423 x 121665094	PKIA x DAB2IC	LOC102724874 - LOC105375911 x DAB2IP						rs2219968A	rs2219968	0		intergenic_variant		NR	6e-07	6.22185		1.3	[1.17-1.43]	Affymetrix, Illumina [1117531] (imputed)	N
2015-05-07	25217961	Al Olama AA	2014-09-14	Nat Genet	www.ncbi.nlm.nih.gov/pubmed/25217961	A meta-analysis of 87,040 individuals identifies 23 new susceptibility loci for prostate cancer.	Prostate cancer	34,379 European ancestry cases, 33,164 European ancestry controls, 5,327 African ancestry cases, 5,136 African ancestry controls, 2,563 Japanese ancestry cases, 4,391 Japanese ancestry controls, 1,034 Latino cases, 1,046 Latino controls	34,379 European ancestry cases, 33,164 European ancestry controls, 5,327 African ancestry cases, 5,136 African ancestry controls, 2,563 Japanese ancestry cases, 4,391 Japanese ancestry controls, 1,034 Latino cases, 1,047 Latino controls	34,379 European ancestry cases, 33,164 European ancestry controls, 5,327 African ancestry cases, 5,136 African ancestry controls, 2,563 Japanese ancestry cases, 4,391 Japanese ancestry controls, 1,034 Latino cases, 1,048 Latino controls	22	19770369	TBX1	TBX1			6899			rs2238776G	rs2238776	0	2238776	intron_variant	0	0.8	2e-08	7.69897		1.08	[1.05-1.11]	Affymetrix, Illumina [up to 16852405] (imputed)	N
2011-08-22	21743467	Kote-Jarai Z	2011-07-10	Nat Genet	www.ncbi.nlm.nih.gov/pubmed/21743467	Seven prostate cancer susceptibility loci identified by a multi-stage genome-wide association study.	Prostate cancer	6,621 European ancestry cases, 6,939 European ancestry controls	6,621 European ancestry cases, 6,940 European ancestry controls	6,621 European ancestry cases, 6,941 European ancestry controls	5	1279913	TERT	TERT			7015			rs2242652G	rs2242652	0	2242652	intron_variant	0	0.81	3e-24	23.5229		1.15	[1.11-1.19]	NR [2600000] (imputed)	N
2013-09-16	23535732	Eeles RA	2013-04-01	Nat Genet	www.ncbi.nlm.nih.gov/pubmed/23535732	Identification of 23 new prostate cancer susceptibility loci using the iCOGS custom genotyping array.	Prostate cancer	11,085 European ancestry cases, 11,463 European ancestry controls	11,085 European ancestry cases, 11,464 European ancestry controls	11,085 European ancestry cases, 11,465 European ancestry controls	6	108963986	LACE1, LINC0022, LINC00222, ARMC2, SESN1, CEP57L1, FOXO3	ARMC2			84071			rs2273669G	rs2273669	0	2273669	intron_variant	0	0.15	8e-09	8.09691		1.07	[1.03-1.11]	Illumina [~ 2600000] (imputed)	N
2011-07-30	21743057	Schumacher FR	2011-07-08	Hum Mol Genet	www.ncbi.nlm.nih.gov/pubmed/21743057	Genome-wide association study identifies new prostate cancer susceptibility loci.	Prostate cancer	2,782 European ancestry cases, 4,458 European ancestry controls	2,782 European ancestry cases, 4,459 European ancestry controls	2,782 European ancestry cases, 4,460 European ancestry controls	2	237534583	MLPH	MLPH			79083			rs2292884G	rs2292884	0	2292884	intron_variant	0	0.25	4e-08	7.39794		1.14	[1.09-1.19]	Illumina [571243]	N
2012-03-31	22219177	Tao S	2012-01-04	Carcinogenesis	www.ncbi.nlm.nih.gov/pubmed/22219177	A genome-wide search for loci interacting with known prostate cancer risk-associated genetic variants.	Prostate cancer (SNP x SNP interaction)	4,723 European ancestry cases, 4,792 European ancestry controls	4,723 European ancestry cases, 4,793 European ancestry controls	4,723 European ancestry cases, 4,794 European ancestry controls	14 x 3	101260770 x 128319530	MIR656 x EEFSEC	LOC100128373 - LOC107984697 x EEFSEC						rs2400997T	rs2400997	0		intron_variant		NR	3e-06	5.52288		1.25	[1.14-1.38]	Affymetrix, Illumina [1117531] (imputed)	N
2013-09-16	23535732	Eeles RA	2013-04-01	Nat Genet	www.ncbi.nlm.nih.gov/pubmed/23535732	Identification of 23 new prostate cancer susceptibility loci using the iCOGS custom genotyping array.	Prostate cancer	11,085 European ancestry cases, 11,463 European ancestry controls	11,085 European ancestry cases, 11,464 European ancestry controls	11,085 European ancestry cases, 11,465 European ancestry controls	X	9846095	GPR143, LOC100288814, SHROOM2, TBL1X, WWC3	SHROOM2			357			rs2405942A	rs2405942	0	2405942	intron_variant	0	0.79	2e-10	9.69897		1.14	[1.09-1.2]	Illumina [~ 2600000] (imputed)	N
2013-09-16	23535732	Eeles RA	2013-04-01	Nat Genet	www.ncbi.nlm.nih.gov/pubmed/23535732	Identification of 23 new prostate cancer susceptibility loci using the iCOGS custom genotyping array.	Prostate cancer	11,085 European ancestry cases, 11,463 European ancestry controls	11,085 European ancestry cases, 11,464 European ancestry controls	11,085 European ancestry cases, 11,465 European ancestry controls	20	62440555	GTPBP5, HRH3, MIR1-1, MIR133A2, MIR4758, OSBPL2, RPS21, LAMA5, ADRM1, C20orf15, C20orf151, C20orf166, C20orf166-AS1, CABLES2, GATA5	LOC105372710			105372710			rs2427345C	rs2427345	0	2427345	intron_variant	0	0.63	4e-08	7.39794		1.06	[1.03-1.1]	Illumina [~ 2600000] (imputed)	N
2016-02-12	25939597	Berndt SI	2015-05-05	Nat Commun	www.ncbi.nlm.nih.gov/pubmed/25939597	Two susceptibility loci identified for prostate cancer aggressiveness.	Prostate cancer	4,600 European ancestry cases, 2,941 European ancestry controls	4,600 European ancestry cases, 2,942 European ancestry controls	4,600 European ancestry cases, 2,943 European ancestry controls	2	62950976	EHBP1	EHBP1			23301			rs2430386T	rs2430386	0	2430386	intron_variant	0	0.5	9e-12	11.0458		1.14	[1.10鈥?.18]	Illumina [1531807] (imputed)	N
2012-03-31	22219177	Tao S	2012-01-04	Carcinogenesis	www.ncbi.nlm.nih.gov/pubmed/22219177	A genome-wide search for loci interacting with known prostate cancer risk-associated genetic variants.	Prostate cancer (SNP x SNP interaction)	4,723 European ancestry cases, 4,792 European ancestry controls	4,723 European ancestry cases, 4,793 European ancestry controls	4,723 European ancestry cases, 4,794 European ancestry controls	6 x 8	29734733 x 23668950	LOC285830 x NKX3.1	HLA-F, HLA-F-AS1 x LOC107986930						rs2523395A	rs2523395	0		intron_variant		NR	2e-06	5.69897		1.24	[1.14-1.35]	Affymetrix, Illumina [1117531] (imputed)	N
2012-03-31	22219177	Tao S	2012-01-04	Carcinogenesis	www.ncbi.nlm.nih.gov/pubmed/22219177	A genome-wide search for loci interacting with known prostate cancer risk-associated genetic variants.	Prostate cancer (SNP x SNP interaction)	4,723 European ancestry cases, 4,792 European ancestry controls	4,723 European ancestry cases, 4,793 European ancestry controls	4,723 European ancestry cases, 4,794 European ancestry controls	5 x 3	67537429 x 87061524	CD180 x NR	LOC101928819 - RPL21P55 x LOC285232 - LINC00506						rs2660753T	rs2660753	0		intron_variant		NR	3e-06	5.52288		1.94	[1.47-2.56]	Affymetrix, Illumina [1117531] (imputed)	N
2012-03-31	22219177	Tao S	2012-01-04	Carcinogenesis	www.ncbi.nlm.nih.gov/pubmed/22219177	A genome-wide search for loci interacting with known prostate cancer risk-associated genetic variants.	Prostate cancer (SNP x SNP interaction)	4,723 European ancestry cases, 4,792 European ancestry controls	4,723 European ancestry cases, 4,793 European ancestry controls	4,723 European ancestry cases, 4,794 European ancestry controls	12 x 22	46978487 x 43104206	AMIGO2 x TTLL1, BIK, MCAT, PACSIN2	LOC107984466 - AMIGO2 x RPS25P10 - BIK						rs2711721T	rs2711721	0		intergenic_variant		NR	2e-06	5.69897		1.28	[1.16-1.42]	Affymetrix, Illumina [1117531] (imputed)	N
2016-07-15	26034056	Hoffmann TJ	2015-06-01	Cancer Discov	www.ncbi.nlm.nih.gov/pubmed/26034056	A large multi-ethnic genome-wide association study of prostate cancer identifies novel risk variants and substantial ethnic differences.	Prostate cancer	6,406 European ancestry cases, 601 African American cases, 288 East Asian ancestry cases, 488 Latino cases30,866 European ancestry controls, 1,650 African American controls, 2,938 East Asian ancestry controls, 3,141 Latino controls	6,406 European ancestry cases, 601 African American cases, 288 East Asian ancestry cases, 488 Latino cases30,866 European ancestry controls, 1,650 African American controls, 2,938 East Asian ancestry controls, 3,142 Latino controls	6,406 European ancestry cases, 601 African American cases, 288 East Asian ancestry cases, 488 Latino cases30,866 European ancestry controls, 1,650 African American controls, 2,938 East Asian ancestry controls, 3,143 Latino controls	19	50861367	NR	KLK3 - KLK2	354	3817		603	12066	rs2735839G	rs2735839	0	2735839	upstream_gene_variant	1	0.85	2e-08	7.69897	(European)	1.2	[1.13-1.28]	Affymetrix [up to 19977088] (imputed)	N
2015-07-08	25086665	Wolpin BM	2014-08-03	Nat Genet	www.ncbi.nlm.nih.gov/pubmed/25086665	Genome-wide association study identifies multiple susceptibility loci for pancreatic cancer.	Pancreatic cancer	1,582 European ancestry cases, 5,203 European ancestry controls	6,101 European ancestry cases, 9,194 European ancestry controls	5p15.33	5	1293971	ZDHHC11, BRD9, TRIP13, LOC100506688, NKD2, SLC12A7, MIR4635, SLC6A19, SLC6A18, MIR4457, TERT, SLC6A3, LPCAT1, CLPTM1L, SDHAP3, LOC728613, MIR4277	TERT			7015			rs2736098T	rs2736098	0	2736098	synonymous_variant	0	0.716	1e-13	13		1.25	[1.18-1.32]	Illumina [608202]	N
2015-05-07	25217961	Al Olama AA	2014-09-14	Nat Genet	www.ncbi.nlm.nih.gov/pubmed/25217961	A meta-analysis of 87,040 individuals identifies 23 new susceptibility loci for prostate cancer.	Prostate cancer	34,379 European ancestry cases, 33,164 European ancestry controls, 5,327 African ancestry cases, 5,136 African ancestry controls, 2,563 Japanese ancestry cases, 4,391 Japanese ancestry controls, 1,034 Latino cases, 1,046 Latino controls	34,379 European ancestry cases, 33,164 European ancestry controls, 5,327 African ancestry cases, 5,136 African ancestry controls, 2,563 Japanese ancestry cases, 4,391 Japanese ancestry controls, 1,034 Latino cases, 1,047 Latino controls	34,379 European ancestry cases, 33,164 European ancestry controls, 5,327 African ancestry cases, 5,136 African ancestry controls, 2,563 Japanese ancestry cases, 4,391 Japanese ancestry controls, 1,034 Latino cases, 1,048 Latino controls	X	52867918	XAGE3	XAGE3			170626			rs2807031C	rs2807031	0	2807031	intron_variant	0	0.18	9e-10	9.04576	(EA)	1.07	[1.04-1.09]	Affymetrix, Illumina [up to 16852405] (imputed)	N
2012-03-31	22219177	Tao S	2012-01-04	Carcinogenesis	www.ncbi.nlm.nih.gov/pubmed/22219177	A genome-wide search for loci interacting with known prostate cancer risk-associated genetic variants.	Prostate cancer (SNP x SNP interaction)	4,723 European ancestry cases, 4,792 European ancestry controls	4,723 European ancestry cases, 4,793 European ancestry controls	4,723 European ancestry cases, 4,794 European ancestry controls	9 x 4	90793457 x 105140377	SYK x TET2	OR7E108P - SYK x LOC100288146 - TET2						rs290258G	rs290258	0		intergenic_variant		NR	1e-06	6		1.3333	[1.19-1.49]	Affymetrix, Illumina [1117531] (imputed)	N
2018-08-14	29892016	Schumacher FR	2018-06-11	Nat Genet	www.ncbi.nlm.nih.gov/pubmed/29892016	Association analyses of more than 140,000 men identify 63 new prostate cancer susceptibility loci.	Prostate cancer	79,148 European ancestry cases, 61,106 European ancestry controls	NA	8p21.2	8	23581462	Intergenic	SLC25A37 - RNU4-71P	51312	106481194		5999	18564	rs2928679A	rs2928679	0	2928679	intergenic_variant	1	0.44	2e-11	10.699		1.05	[1.04-1.07]	Illumina [20370935] (imputed)	N
2013-09-16	23535732	Eeles RA	2013-04-01	Nat Genet	www.ncbi.nlm.nih.gov/pubmed/23535732	Identification of 23 new prostate cancer susceptibility loci using the iCOGS custom genotyping array.	Prostate cancer	11,085 European ancestry cases, 11,463 European ancestry controls	11,085 European ancestry cases, 11,464 European ancestry controls	11,085 European ancestry cases, 11,465 European ancestry controls	6	32224554	CYP21A2, DOM3Z, FKBPL, HLA-DRB6, HCG23, LOC10029, ATF6B, LOC100293534, AGER, LOC100507547, MIR1236, PPT2, PPT2-EGF, HLA-DRA, PPT2-EGFL8, RNF5, RNF5P1, CFB, RDBP, TNXA, TNXB, HLA-DQB1, NOTCH4, SKIV2L, STK19, GPSM3, PBX2, LOC10050, EGFL8, AGPAT1, C2, C4A, PRRT1, BTNL2, C4B, HLA-DRB5, C6orf10, HLA-DRB1, CYP21A1P, HLA-DQA1	NOTCH4 - LOC101929163	4855	101929163		487	30619	rs3096702A	rs3096702	0	3096702	upstream_gene_variant	1	0.4	5e-09	8.30103		1.07	[1.04-1.10]	Illumina [~ 2600000] (imputed)	N
2009-12-29	19767753	Eeles RA	2009-09-20	Nat Genet	www.ncbi.nlm.nih.gov/pubmed/19767753	Identification of seven new prostate cancer susceptibility loci through a genome-wide association study.	Prostate cancer	1,854 European ancestry cases, 1,894 European ancestry controls	1,854 European ancestry cases, 1,895 European ancestry controls	1,854 European ancestry cases, 1,896 European ancestry controls	10	46070851	NR	RPL23AP61 - AGAP7P	728484	653268		7131	38644	rs3123078T	rs3123078	0	3123078	intergenic_variant	1	NR	1e-19	19				Illumina [541129]	N
2010-09-11	20676098	Takata R	2010-08-01	Nat Genet	www.ncbi.nlm.nih.gov/pubmed/20676098	Genome-wide association study identifies five new susceptibility loci for prostate cancer in the Japanese population.	Prostate cancer	1,583 Japanese ancestry cases, 3,386 Japanese ancestry controls	3,001 Japanese ancestry cases, 5,415 Japanese ancestry controls	6q22.1	6	116888889	GPRC6A, RFX6	RFX6			222546			rs339331T	rs339331	0	339331	intron_variant	0	0.37	2e-12	11.699		1.22	[1.15-1.28]	Illumina [510687]	N
2008-09-17	17903305	Murabito JM	2007-09-19	BMC Med Genet	www.ncbi.nlm.nih.gov/pubmed/17903305	A genome-wide association study of breast and prostate cancer in the NHLBI's Framingham Heart Study.	Prostate cancer	59 cases, 558 controls	60 cases, 558 controls	61 cases, 558 controls	3	145456001	intergenic	LOC105374141 - LARP7P4	105374141	100421509		559760	67525	rs345013G	rs345013	0	345013	intergenic_variant	1	NR	5e-06	5.30103				Affymetrix [70897]	N
2016-02-13	25939597	Berndt SI	2015-05-05	Nat Commun	www.ncbi.nlm.nih.gov/pubmed/25939597	Two susceptibility loci identified for prostate cancer aggressiveness.	Prostate cancer aggressiveness	4,545 European ancestry cases	4,546 European ancestry cases	4,547 European ancestry cases	5	87315172	RASA1, CCNH	CCNH, RASA1			902, 5921			rs35148638C	rs35148638	0	35148638	intron_variant	0	0.255	6e-09	8.22185		0.088	[0.059-0.117] unit increase	Illumina [1531807] (imputed)	N
2016-07-15	26034056	Hoffmann TJ	2015-06-01	Cancer Discov	www.ncbi.nlm.nih.gov/pubmed/26034056	A large multiethnic genome-wide association study of prostate cancer identifies novel risk variants and substantial ethnic differences.	Prostate cancer	6,406 European ancestry cases, 601 African American cases, 288 East Asian ancestry cases, 488 Latino cases30,866 European ancestry controls, 1,650 African American controls, 2,938 East Asian ancestry controls, 3,141 Latino controls	4,599 European ancestry cases, 2,265 African American cases, 2,940 European ancestry controls, 2,414 African American controls	11q13.3	11	69244226	NR	LOC105369367 - LOC105369368	105369367	105369368		9290	3775	rs376592364T	rs376592364	0	376592364	intergenic_variant	1	0.52	6e-20	19.2218		1.2	[1.16-1.25]	Affymetrix [up to 19977088] (imputed)	N
2013-09-16	23535732	Eeles RA	2013-04-01	Nat Genet	www.ncbi.nlm.nih.gov/pubmed/23535732	Identification of 23 new prostate cancer susceptibility loci using the iCOGS custom genotyping array.	Prostate cancer	11,085 European ancestry cases, 11,463 European ancestry controls	11,085 European ancestry cases, 11,464 European ancestry controls	11,085 European ancestry cases, 11,465 European ancestry controls	2	241443449	BOK-AS1, DTYMK, FARP2, HDLBP, SEP2, STK25, THAP4, ANO7, ATG4B, BOK	FARP2			9855			rs3771570T	rs3771570	0	3771570	3_prime_UTR_variant	0	0.15	5e-09	8.30103		1.12	[1.08-1.17]	Illumina [~ 2600000] (imputed)	N
2012-03-31	22219177	Tao S	2012-01-04	Carcinogenesis	www.ncbi.nlm.nih.gov/pubmed/22219177	A genome-wide search for loci interacting with known prostate cancer risk-associated genetic variants.	Prostate cancer (SNP x SNP interaction)	4,723 European ancestry cases, 4,792 European ancestry controls	4,723 European ancestry cases, 4,793 European ancestry controls	4,723 European ancestry cases, 4,794 European ancestry controls	2 x 11	111039954 x 2212344	ACOXL x IGF2, IGF2AS, INS, TH	ACOXL x TH - ASCL2						rs3789080C	rs3789080	0		intron_variant		NR	4e-06	5.39794		1.4085	[1.22-1.64]	Affymetrix, Illumina [1117531] (imputed)	N
2013-09-16	23535732	Eeles RA	2013-04-01	Nat Genet	www.ncbi.nlm.nih.gov/pubmed/23535732	Identification of 23 new prostate cancer susceptibility loci using the iCOGS custom genotyping array.	Prostate cancer	11,085 European ancestry cases, 11,463 European ancestry controls	11,085 European ancestry cases, 11,464 European ancestry controls	11,085 European ancestry cases, 11,465 European ancestry controls	10	102654464	CNNM2, CUEDC2, CYP17A1, FBXL15, LOC100505761, MIR146B, PSD, SFXN2, SUFU, TMEM180, ARL3, ACTR1A, AS3MT, TRIM8, C10orf32, C10orf32-AS3MT, WBP1L, C10orf95	TRIM8, LOC105378460			81603, 105378460			rs3850699A	rs3850699	0	3850699	intron_variant	0	0.71	5e-10	9.30103		1.1	[1.06-1.12]	Illumina [~ 2600000] (imputed)	N
2016-02-12	25939597	Berndt SI	2015-05-05	Nat Commun	www.ncbi.nlm.nih.gov/pubmed/25939597	Two susceptibility loci identified for prostate cancer aggressiveness.	Prostate cancer	4,600 European ancestry cases, 2,941 European ancestry controls	4,600 European ancestry cases, 2,942 European ancestry controls	4,600 European ancestry cases, 2,943 European ancestry controls	8	127505328	LOC727677, CASC8	CASC8 - LOC105375754	727677	105375754		23189	159211	rs4242382A	rs4242382	0	4242382	intergenic_variant	1	0.1	1e-34	34		1.45	[1.35-1.54]	Illumina [1531807] (imputed)	N
2009-12-29	19767753	Eeles RA	2009-09-20	Nat Genet	www.ncbi.nlm.nih.gov/pubmed/19767753	Identification of seven new prostate cancer susceptibility loci through a genome-wide association study.	Prostate cancer	1,854 European ancestry cases, 1,894 European ancestry controls	1,854 European ancestry cases, 1,895 European ancestry controls	1,854 European ancestry cases, 1,896 European ancestry controls	8	127506309	NR	CASC8 - LOC105375754	727677	105375754		24170	158230	rs4242384C	rs4242384	0	4242384	intergenic_variant	1	NR	2e-24	23.699				Illumina [541129]	N
2013-09-16	23535732	Eeles RA	2013-04-01	Nat Genet	www.ncbi.nlm.nih.gov/pubmed/23535732	Identification of 23 new prostate cancer susceptibility loci using the iCOGS custom genotyping array.	Prostate cancer	11,085 European ancestry cases, 11,463 European ancestry controls	11,085 European ancestry cases, 11,464 European ancestry controls	11,085 European ancestry cases, 11,465 European ancestry controls	1	204549714	LRRN2, PIK3C2B, LOC127841, MDM4, PPP1R15B, PLEKHA6	MDM4			4194			rs4245739A	rs4245739	0	4245739	3_prime_UTR_variant	0	0.75	2e-11	10.699		1.1	[1.05-1.14]	Illumina [~ 2600000] (imputed)	N
2012-03-31	22219177	Tao S	2012-01-04	Carcinogenesis	www.ncbi.nlm.nih.gov/pubmed/22219177	A genome-wide search for loci interacting with known prostate cancer risk-associated genetic variants.	Prostate cancer (SNP x SNP interaction)	4,723 European ancestry cases, 4,792 European ancestry controls	4,723 European ancestry cases, 4,793 European ancestry controls	4,723 European ancestry cases, 4,794 European ancestry controls	12 x 17	48417317 x 37738049	ANP32D x HNF1B	OR8S21P, C12orf54 x HNF1B						rs4430796G	rs4430796	0		non_coding_transcript_exon_variant		NR	1e-06	6		1.47	[1.25-1.72]	Affymetrix, Illumina [1117531] (imputed)	N
2011-07-30	21743057	Schumacher FR	2011-07-08	Hum Mol Genet	www.ncbi.nlm.nih.gov/pubmed/21743057	Genome-wide association study identifies new prostate cancer susceptibility loci.	Prostate cancer	2,782 European ancestry cases, 4,458 European ancestry controls	2,782 European ancestry cases, 4,459 European ancestry controls	2,782 European ancestry cases, 4,460 European ancestry controls	8	127310936	intergenic	CASC21, CASC8			103021164, 727677			rs445114T	rs445114	0	445114	intron_variant	0	NR	5e-07	6.30103		1.22	[1.12-1.32]	Illumina [571243]	N
2012-03-31	22219177	Tao S	2012-01-04	Carcinogenesis	www.ncbi.nlm.nih.gov/pubmed/22219177	A genome-wide search for loci interacting with known prostate cancer risk-associated genetic variants.	Prostate cancer (SNP x SNP interaction)	4,723 European ancestry cases, 4,792 European ancestry controls	4,723 European ancestry cases, 4,793 European ancestry controls	4,723 European ancestry cases, 4,794 European ancestry controls	5 x 19	13505322 x 41479716	DNAH5 x PPP1R14A	LOC105374660 x PCAT19						rs4463179A	rs4463179	0		intergenic_variant		NR	2e-06	5.69897		1.5625	[1.3-1.89]	Affymetrix, Illumina [1117531] (imputed)	N
2008-09-17	17903305	Murabito JM	2007-09-19	BMC Med Genet	www.ncbi.nlm.nih.gov/pubmed/17903305	A genome-wide association study of breast and prostate cancer in the NHLBI's Framingham Heart Study.	Prostate cancer	59 cases, 558 controls	60 cases, 558 controls	61 cases, 558 controls	5	83689920	HAPLN1	HAPLN1			1404			rs4466137T	rs4466137	0	4466137	intron_variant	0	NR	3e-06	5.52288				Affymetrix [70897]	N
2012-03-31	22219177	Tao S	2012-01-04	Carcinogenesis	www.ncbi.nlm.nih.gov/pubmed/22219177	A genome-wide search for loci interacting with known prostate cancer risk-associated genetic variants.	Prostate cancer (SNP x SNP interaction)	4,723 European ancestry cases, 4,792 European ancestry controls	4,723 European ancestry cases, 4,793 European ancestry controls	4,723 European ancestry cases, 4,794 European ancestry controls	12 x 17	48417317 x 37738049	ANP32D x HNF1B	OR8S21P, C12orf54 x HNF1B						rs4489787C	rs4489787	0		non_coding_transcript_exon_variant		NR	1e-06	6		1.47	[1.25-1.72]	Affymetrix, Illumina [1117531] (imputed)	N
2016-07-15	26034056	Hoffmann TJ	2015-06-01	Cancer Discov	www.ncbi.nlm.nih.gov/pubmed/26034056	A large multiethnic genome-wide association study of prostate cancer identifies novel risk variants and substantial ethnic differences.	Prostate cancer	6,406 European ancestry cases, 601 African American cases, 288 East Asian ancestry cases, 488 Latino cases30,866 European ancestry controls, 1,650 African American controls, 2,938 East Asian ancestry controls, 3,141 Latino controls	4,599 European ancestry cases, 2,265 African American cases, 2,940 European ancestry controls, 2,414 African American controls	6q25.3	6	160160512	SLC22A2, SLC22A1	SLC22A1 - SLC22A2	6580	6582		1311	56250	rs4646284TG	rs4646284	0	4646284	regulatory_region_variant	1	0.298	1e-19	19		1.18	[1.14-1.22]	Affymetrix [up to 19977088] (imputed)	N
2015-05-07	25217961	Al Olama AA	2014-09-14	Nat Genet	www.ncbi.nlm.nih.gov/pubmed/25217961	A meta-analysis of 87,040 individuals identifies 23 new susceptibility loci for prostate cancer.	Prostate cancer	34,379 European ancestry cases, 33,164 European ancestry controls, 5,327 African ancestry cases, 5,136 African ancestry controls, 2,563 Japanese ancestry cases, 4,391 Japanese ancestry controls, 1,034 Latino cases, 1,046 Latino controls	34,379 European ancestry cases, 33,164 European ancestry controls, 5,327 African ancestry cases, 5,136 African ancestry controls, 2,563 Japanese ancestry cases, 4,391 Japanese ancestry controls, 1,034 Latino cases, 1,047 Latino controls	34,379 European ancestry cases, 33,164 European ancestry controls, 5,327 African ancestry cases, 5,136 African ancestry controls, 2,563 Japanese ancestry cases, 4,391 Japanese ancestry controls, 1,034 Latino cases, 1,048 Latino controls	6	11218797	NEDD9	NEDD9			4739			rs4713266C	rs4713266	0	4713266	intron_variant	0	0.52	4e-08	7.39794	(EA)	1.07	[1.04-1.09]	Affymetrix, Illumina [up to 16852405] (imputed)	N
2012-01-11	22130093	Nam RK	2011-12-01	Cancer Biol Ther	www.ncbi.nlm.nih.gov/pubmed/22130093	New variants at 10q26 and 15q21 are associated with aggressive prostate cancer in a genome-wide association study from a prostate biopsy screening cohort.	Prostate cancer	316 cases, 229 controls	317 cases, 229 controls	318 cases, 229 controls	15	46347610	intergenic	LOC100419366 - LOC105370803	100419366	105370803		247236	260140	rs4775302A	rs4775302	0	4775302	downstream_gene_variant	1	NR	4e-08	7.39794				Affymetrix [443816]	N
2014-11-07	24753544	Knipe DW	2014-04-21	Cancer Epidemiol Biomarkers Prev	www.ncbi.nlm.nih.gov/pubmed/24753544	Genetic variation in prostate-specific antigen-detected prostate cancer and the effect of control selection on genetic association studies.	Prostate cancer	1,146 European ancestry cases, 1,804 European ancestry controls	1,146 European ancestry cases, 1,805 European ancestry controls	1,146 European ancestry cases, 1,806 European ancestry controls	17	71122495	SOX9, CALM2P1	CASC17			101928165			rs4793529T	rs4793529	0	4793529	intron_variant	0		2e-13	12.699		0.28	[0.20-0.35] unit increase	Illumina [514432] (imputed)	N
2012-03-31	22219177	Tao S	2012-01-04	Carcinogenesis	www.ncbi.nlm.nih.gov/pubmed/22219177	A genome-wide search for loci interacting with known prostate cancer risk-associated genetic variants.	Prostate cancer (SNP x SNP interaction)	4,723 European ancestry cases, 4,792 European ancestry controls	4,723 European ancestry cases, 4,793 European ancestry controls	4,723 European ancestry cases, 4,794 European ancestry controls	22 x 11	40279087 x 2212344	TNRC6B x IGF2, IGF2AS, INS, TH	TNRC6B x TH - ASCL2						rs4821941G	rs4821941	0		intron_variant		NR	4e-06	5.39794		1.3	[1.16-1.46]	Affymetrix, Illumina [1117531] (imputed)	N
2015-05-07	25217961	Al Olama AA	2014-09-14	Nat Genet	www.ncbi.nlm.nih.gov/pubmed/25217961	A meta-analysis of 87,040 individuals identifies 23 new susceptibility loci for prostate cancer.	Prostate cancer	34,379 European ancestry cases, 33,164 European ancestry controls, 5,327 African ancestry cases, 5,136 African ancestry controls, 2,563 Japanese ancestry cases, 4,391 Japanese ancestry controls, 1,034 Latino cases, 1,046 Latino controls	34,379 European ancestry cases, 33,164 European ancestry controls, 5,327 African ancestry cases, 5,136 African ancestry controls, 2,563 Japanese ancestry cases, 4,391 Japanese ancestry controls, 1,034 Latino cases, 1,047 Latino controls	34,379 European ancestry cases, 33,164 European ancestry controls, 5,327 African ancestry cases, 5,136 African ancestry controls, 2,563 Japanese ancestry cases, 4,391 Japanese ancestry controls, 1,034 Latino cases, 1,048 Latino controls	X	71188133	NLGN3, BCYRN1	LOC107985688			107985688			rs4844289G	rs4844289	0	4844289	intron_variant	0	0.39	1e-09	9	(EA)	1.05	[1.04-1.07]	Affymetrix, Illumina [up to 16852405] (imputed)	N
2017-02-02	27515689	Kerns SL	2016-07-20	EBioMedicine	www.ncbi.nlm.nih.gov/pubmed/27515689	Meta-analysis of Genome Wide Association Studies Identifies Genetic Markers of Late Toxicity Following Radiotherapy for Prostate Cancer.	Response to radiotherapy in prostate cancer (overall toxicity)	1,346 European ancestry individuals	NA	15q12	15	25730061	Intergenic	ATP10A			57194			rs4906759-T	rs4906759	0	4906759	intron_variant	0	0.06	2e-07	6.69897		0.55	[0.34-0.75] unit increase	NR [~ 38000000] (imputed)	N
2012-03-31	22219177	Tao S	2012-01-04	Carcinogenesis	www.ncbi.nlm.nih.gov/pubmed/22219177	A genome-wide search for loci interacting with known prostate cancer risk-associated genetic variants.	Prostate cancer (SNP x SNP interaction)	4,723 European ancestry cases, 4,792 European ancestry controls	4,723 European ancestry cases, 4,793 European ancestry controls	4,723 European ancestry cases, 4,794 European ancestry controls	5 x 10	57834991 x 125008303	ACTBL2 x CTBP2	LOC101928505 - LOC101928539 x CTBP2						rs4962416C	rs4962416	0		intron_variant		NR	4e-06	5.39794		1.32	[1.18-1.49]	Affymetrix, Illumina [1117531] (imputed)	N
2012-03-31	22219177	Tao S	2012-01-04	Carcinogenesis	www.ncbi.nlm.nih.gov/pubmed/22219177	A genome-wide search for loci interacting with known prostate cancer risk-associated genetic variants.	Prostate cancer (SNP x SNP interaction)	4,723 European ancestry cases, 4,792 European ancestry controls	4,723 European ancestry cases, 4,793 European ancestry controls	4,723 European ancestry cases, 4,794 European ancestry controls	15 x 8	34776108 x 127401060	ACTC1 x NR	LOC101928174 x CCAT2, CASC8						rs543686T	rs543686	0		intron_variant		NR	4e-06	5.39794		1.24	[1.13-1.35]	Affymetrix, Illumina [1117531] (imputed)	N
2015-05-07	25217961	Al Olama AA	2014-09-14	Nat Genet	www.ncbi.nlm.nih.gov/pubmed/25217961	A meta-analysis of 87,040 individuals identifies 23 new susceptibility loci for prostate cancer.	Prostate cancer	34,379 European ancestry cases, 33,164 European ancestry controls, 5,327 African ancestry cases, 5,136 African ancestry controls, 2,563 Japanese ancestry cases, 4,391 Japanese ancestry controls, 1,034 Latino cases, 1,046 Latino controls	34,379 European ancestry cases, 33,164 European ancestry controls, 5,327 African ancestry cases, 5,136 African ancestry controls, 2,563 Japanese ancestry cases, 4,391 Japanese ancestry controls, 1,034 Latino cases, 1,047 Latino controls	34,379 European ancestry cases, 33,164 European ancestry controls, 5,327 African ancestry cases, 5,136 African ancestry controls, 2,563 Japanese ancestry cases, 4,391 Japanese ancestry controls, 1,034 Latino cases, 1,048 Latino controls	7	47397647	TNS3	TNS3			64759			rs56232506A	rs56232506	0	56232506	intron_variant	0	0.45	2e-09	8.69897	(EA)	1.07	[1.05-1.09]	Affymetrix, Illumina [up to 16852405] (imputed)	N
2012-03-31	22219177	Tao S	2012-01-04	Carcinogenesis	www.ncbi.nlm.nih.gov/pubmed/22219177	A genome-wide search for loci interacting with known prostate cancer risk-associated genetic variants.	Prostate cancer (SNP x SNP interaction)	4,723 European ancestry cases, 4,792 European ancestry controls	4,723 European ancestry cases, 4,793 European ancestry controls	4,723 European ancestry cases, 4,794 European ancestry controls	22 x 4	22490916 x 105140377	ZNF280B x TET2	ZNF280B, IGL x LOC100288146 - TET2						rs5751168T	rs5751168	0		intron_variant		NR	4e-06	5.39794		1.44	[1.23-1.67]	Affymetrix, Illumina [1117531] (imputed)	N
2016-07-15	26034056	Hoffmann TJ	2015-06-01	Cancer Discov	www.ncbi.nlm.nih.gov/pubmed/26034056	A large multi-ethnic genome-wide association study of prostate cancer identifies novel risk variants and substantial ethnic differences.	Prostate cancer	6,406 European ancestry cases, 601 African American cases, 288 East Asian ancestry cases, 488 Latino cases30,866 European ancestry controls, 1,650 African American controls, 2,938 East Asian ancestry controls, 3,141 Latino controls	6,406 European ancestry cases, 601 African American cases, 288 East Asian ancestry cases, 488 Latino cases30,866 European ancestry controls, 1,650 African American controls, 2,938 East Asian ancestry controls, 3,142 Latino controls	6,406 European ancestry cases, 601 African American cases, 288 East Asian ancestry cases, 488 Latino cases30,866 European ancestry controls, 1,650 African American controls, 2,938 East Asian ancestry controls, 3,143 Latino controls	22	43104206	NR	RPS25P10 - BIK	100271372	638		11618	6542	rs5759167T	rs5759167	0	5759167	intergenic_variant	1	0.505	2e-09	8.69897		1.13	[1.09-1.18]	Affymetrix [up to 19977088] (imputed)	N
2011-08-22	21743467	Kote-Jarai Z	2011-07-10	Nat Genet	www.ncbi.nlm.nih.gov/pubmed/21743467	Seven prostate cancer susceptibility loci identified by a multi-stage genome-wide association study.	Prostate cancer	6,621 European ancestry cases, 6,939 European ancestry controls	6,621 European ancestry cases, 6,940 European ancestry controls	6,621 European ancestry cases, 6,941 European ancestry controls	X	67801708	AR	BMI1P1 - OPHN1	100127902	4983		8659	240636	rs5919432T	rs5919432	0	5919432	intergenic_variant	1	0.81	1e-08	8		1.06	[1.02-1.12]	NR [2600000] (imputed)	N
2008-06-16	18264098	Gudmundsson J	2008-02-10	Nat Genet	www.ncbi.nlm.nih.gov/pubmed/18264098	Common sequence variants on 2p15 and Xp11.22 confer susceptibility to prostate cancer.	Prostate cancer	1,854 European ancestry cases, 21,372 European ancestry controls	1,854 European ancestry cases, 21,373 European ancestry controls	1,854 European ancestry cases, 21,374 European ancestry controls	X	51486831	LOC340602, NUDT10, NUDT11	CXorf67 - NUDT11	340602	55190		77993	3180	rs5945572A	rs5945572	0	5945572	downstream_gene_variant	1	0.35	4e-13	12.3979		1.23	[1.16-1.30]	Illumina [310520]	N
2008-06-16	18264097	Eeles RA	2008-02-10	Nat Genet	www.ncbi.nlm.nih.gov/pubmed/18264097	Multiple newly identified loci associated with prostate cancer susceptibility.	Prostate cancer	1,854 European ancestry cases, 1,894 European ancestry controls	1,854 European ancestry cases, 1,895 European ancestry controls	1,854 European ancestry cases, 1,896 European ancestry controls	X	51498820	NUDT10, NUDT11	NUDT11 - LINC01496	55190	102723426		2213	1089	rs5945619C	rs5945619	0	5945619	upstream_gene_variant	1	0.36	2e-09	8.69897		1.19	[1.07-1.31]	Illumina [541129]	N
2012-03-31	22219177	Tao S	2012-01-04	Carcinogenesis	www.ncbi.nlm.nih.gov/pubmed/22219177	A genome-wide search for loci interacting with known prostate cancer risk-associated genetic variants.	Prostate cancer (SNP x SNP interaction)	4,723 European ancestry cases, 4,792 European ancestry controls	4,723 European ancestry cases, 4,793 European ancestry controls	4,723 European ancestry cases, 4,794 European ancestry controls	22 x 8	27456222 x 127310936	MN1 x NR	LOC105372980 - LOC105372981 x CASC21, CASC8						rs6005451C	rs6005451	0		downstream_gene_variant		NR	4e-06	5.39794		1.42	[1.22-1.65]	Affymetrix, Illumina [1117531] (imputed)	N
2013-09-16	23535732	Eeles RA	2013-04-01	Nat Genet	www.ncbi.nlm.nih.gov/pubmed/23535732	Identification of 23 new prostate cancer susceptibility loci using the iCOGS custom genotyping array.	Prostate cancer	11,085 European ancestry cases, 11,463 European ancestry controls	11,085 European ancestry cases, 11,464 European ancestry controls	11,085 European ancestry cases, 11,465 European ancestry controls	20	63731211	STMN3, ZBTB46, ZGPAT, ABHD16B, ARFRP1, C20orf195, DNAJC5, EEF1A2, GMEB2, LIME1, LOC100505815, MIR1914, MIR647, MIR941-1, MIR941-2, MIR941-3, MIR941-4, PPDPF, PRIC285, PRPF6, PTK6, RTEL1, RTEL1-TN, RTEL1-TNFRSF6B, SAMD10, SRMS, TNFRSF6B, TPD52L2, UCKL1, SLC2A4RG, UCKL1-AS1, ZNF512B	ZGPAT			84619			rs6062509T	rs6062509	0	6062509	intron_variant	0	0.7	4e-16	15.3979		1.12	[1.09-1.16]	Illumina [~ 2600000] (imputed)	N
2012-03-31	22219177	Tao S	2012-01-04	Carcinogenesis	www.ncbi.nlm.nih.gov/pubmed/22219177	A genome-wide search for loci interacting with known prostate cancer risk-associated genetic variants.	Prostate cancer (SNP x SNP interaction)	4,723 European ancestry cases, 4,792 European ancestry controls	4,723 European ancestry cases, 4,793 European ancestry controls	4,723 European ancestry cases, 4,794 European ancestry controls	20 x 19	63037684 x 50861367	LOC63930 x KLK3	LOC63930 x KLK3 - KLK2						rs6089829A	rs6089829	0		intron_variant		NR	3e-06	5.52288		1.3514	[1.19-1.54]	Affymetrix, Illumina [1117531] (imputed)	N
2019-02-08	30595370	Kichaev G	2018-12-27	Am J Hum Genet	www.ncbi.nlm.nih.gov/pubmed/30595370	Leveraging Polygenic Functional Enrichment to Improve GWAS Power.	Waist-hip ratio	approximately 458,000 European ancestry individuals	NA	8q24.21	8	127323428		PCAT1, CASC8, POU5F1B			ENSG00000253438, ENSG00000246228, ENSG00000212993			rs620861G	rs620861	0	620861	intron_variant	0	NR	6e-17	16.2218				NR [~ 8900000] (imputed)	N
2016-02-13	25939597	Berndt SI	2015-05-05	Nat Commun	www.ncbi.nlm.nih.gov/pubmed/25939597	Two susceptibility loci identified for prostate cancer aggressiveness.	Prostate cancer aggressiveness	4,545 European ancestry cases	4,546 European ancestry cases	4,547 European ancestry cases	19	50857584	KLK3	KLK3			354			rs62113212T	rs62113212	0	62113212	non_coding_transcript_exon_variant	0	0.061	6e-09	8.22185		0.138	[0.091-0.185] unit increase	Illumina [1531807] (imputed)	N
2015-05-07	25217961	Al Olama AA	2014-09-14	Nat Genet	www.ncbi.nlm.nih.gov/pubmed/25217961	A meta-analysis of 87,040 individuals identifies 23 new susceptibility loci for prostate cancer.	Prostate cancer	34,379 European ancestry cases, 33,164 European ancestry controls, 5,327 African ancestry cases, 5,136 African ancestry controls, 2,563 Japanese ancestry cases, 4,391 Japanese ancestry controls, 1,034 Latino cases, 1,046 Latino controls	34,379 European ancestry cases, 33,164 European ancestry controls, 5,327 African ancestry cases, 5,136 African ancestry controls, 2,563 Japanese ancestry cases, 4,391 Japanese ancestry controls, 1,034 Latino cases, 1,047 Latino controls	34,379 European ancestry cases, 33,164 European ancestry controls, 5,327 African ancestry cases, 5,136 African ancestry controls, 2,563 Japanese ancestry cases, 4,391 Japanese ancestry controls, 1,034 Latino cases, 1,048 Latino controls	1	10496040	PEX14	PEX14			5195			rs636291A	rs636291	0	636291	intron_variant	0	0.16	2e-08	7.69897	(EA, early-onset)	1.18	[1.12-1.24]	Affymetrix, Illumina [up to 16852405] (imputed)	N
2009-12-29	19767753	Eeles RA	2009-09-20	Nat Genet	www.ncbi.nlm.nih.gov/pubmed/19767753	Identification of seven new prostate cancer susceptibility loci through a genome-wide association study.	Prostate cancer	1,854 European ancestry cases, 1,894 European ancestry controls	1,854 European ancestry cases, 1,895 European ancestry controls	1,854 European ancestry cases, 1,896 European ancestry controls	7	98187015	NR	LMTK2			22853			rs6465657T	rs6465657	0	6465657	intron_variant	0	NR	2e-08	7.69897				Illumina [541129]	N
2012-03-31	22219177	Tao S	2012-01-04	Carcinogenesis	www.ncbi.nlm.nih.gov/pubmed/22219177	A genome-wide search for loci interacting with known prostate cancer risk-associated genetic variants.	Prostate cancer (SNP x SNP interaction)	4,723 European ancestry cases, 4,792 European ancestry controls	4,723 European ancestry cases, 4,793 European ancestry controls	4,723 European ancestry cases, 4,794 European ancestry controls	18 x X	33347811 x 51498820	C18orf34 x NUDT10	CCDC178 x NUDT11 - LINC01496						rs6507016T	rs6507016	0		intron_variant		NR	4e-06	5.39794		1.2821	[1.15-1.41]	Affymetrix, Illumina [1117531] (imputed)	N
2009-12-29	19767753	Eeles RA	2009-09-20	Nat Genet	www.ncbi.nlm.nih.gov/pubmed/19767753	Identification of seven new prostate cancer susceptibility loci through a genome-wide association study.	Prostate cancer	1,854 European ancestry cases, 1,894 European ancestry controls	1,854 European ancestry cases, 1,895 European ancestry controls	1,854 European ancestry cases, 1,896 European ancestry controls	6	160160342	NR	SLC22A1 - SLC22A2	6580	6582		1141	56420	rs651164A	rs651164	0	651164	downstream_gene_variant	1	NR	2e-09	8.69897				Illumina [541129]	N
2009-12-29	19767753	Eeles RA	2009-09-20	Nat Genet	www.ncbi.nlm.nih.gov/pubmed/19767753	Identification of seven new prostate cancer susceptibility loci through a genome-wide association study.	Prostate cancer	1,854 European ancestry cases, 1,894 European ancestry controls	1,854 European ancestry cases, 1,895 European ancestry controls	1,854 European ancestry cases, 1,896 European ancestry controls	2	63074029	EHBP1	LOC107985769			107985769			rs6545977A	rs6545977	0	6545977	intergenic_variant	0	NR	5e-07	6.30103				Illumina [541129]	N
2015-05-07	25217961	Al Olama AA	2014-09-14	Nat Genet	www.ncbi.nlm.nih.gov/pubmed/25217961	A meta-analysis of 87,040 individuals identifies 23 new susceptibility loci for prostate cancer.	Prostate cancer	34,379 European ancestry cases, 33,164 European ancestry controls, 5,327 African ancestry cases, 5,136 African ancestry controls, 2,563 Japanese ancestry cases, 4,391 Japanese ancestry controls, 1,034 Latino cases, 1,046 Latino controls	34,379 European ancestry cases, 33,164 European ancestry controls, 5,327 African ancestry cases, 5,136 African ancestry controls, 2,563 Japanese ancestry cases, 4,391 Japanese ancestry controls, 1,034 Latino cases, 1,047 Latino controls	34,379 European ancestry cases, 33,164 European ancestry controls, 5,327 African ancestry cases, 5,136 African ancestry controls, 2,563 Japanese ancestry cases, 4,391 Japanese ancestry controls, 1,034 Latino cases, 1,048 Latino controls	X	70920000	SLC7A	TEX11 - SLC7A3	56159	84889		11283	5579	rs6625711A	rs6625711	0	6625711	intergenic_variant	1	0.41	6e-12	11.2218	(EA)	1.07	[1.05-1.08]	Affymetrix, Illumina [up to 16852405] (imputed)	N
2012-03-31	22219177	Tao S	2012-01-04	Carcinogenesis	www.ncbi.nlm.nih.gov/pubmed/22219177	A genome-wide search for loci interacting with known prostate cancer risk-associated genetic variants.	Prostate cancer (SNP x SNP interaction)	4,723 European ancestry cases, 4,792 European ancestry controls	4,723 European ancestry cases, 4,793 European ancestry controls	4,723 European ancestry cases, 4,794 European ancestry controls	3 x 22	1470903 x 40056115	CNTN6 x TNRC6B	CNTN6 - RPL23AP38 x TNRC6B						rs6763848A	rs6763848	0		intergenic_variant		NR	4e-06	5.39794		1.3	[1.16-1.45]	Affymetrix, Illumina [1117531] (imputed)	N
2011-08-22	21743467	Kote-Jarai Z	2011-07-10	Nat Genet	www.ncbi.nlm.nih.gov/pubmed/21743467	Seven prostate cancer susceptibility loci identified by a multi-stage genome-wide association study.	Prostate cancer	6,621 European ancestry cases, 6,939 European ancestry controls	6,621 European ancestry cases, 6,940 European ancestry controls	6,621 European ancestry cases, 6,941 European ancestry controls	3	141383991	ZBTB38	ZBTB38			253461			rs6763931A	rs6763931	0	6763931	intron_variant	0	0.45	2e-08	7.69897		1.04	[1.01-1.07]	NR [2600000] (imputed)	N
2012-03-31	22219177	Tao S	2012-01-04	Carcinogenesis	www.ncbi.nlm.nih.gov/pubmed/22219177	A genome-wide search for loci interacting with known prostate cancer risk-associated genetic variants.	Prostate cancer (SNP x SNP interaction)	4,723 European ancestry cases, 4,792 European ancestry controls	4,723 European ancestry cases, 4,793 European ancestry controls	4,723 European ancestry cases, 4,794 European ancestry controls	3 x 10	12510308 x 46046326	TSEN2 x MSMB	TSEN2 x MSMB - RPL23AP61						rs6766510C	rs6766510	0		intron_variant		NR	2e-06	5.69897		1.58	[1.31-1.91]	Affymetrix, Illumina [1117531] (imputed)	N
2013-09-16	23535732	Eeles RA	2013-04-01	Nat Genet	www.ncbi.nlm.nih.gov/pubmed/23535732	Identification of 23 new prostate cancer susceptibility loci using the iCOGS custom genotyping array.	Prostate cancer	11,085 European ancestry cases, 11,463 European ancestry controls	11,085 European ancestry cases, 11,464 European ancestry controls	11,085 European ancestry cases, 11,465 European ancestry controls	17	715725	DBIL5P, FAM57A, GEMIN4, GLOD4, NXN, RNMTL1, VPS53	VPS53 - FAM57A	55275	79850		869	16821	rs684232C	rs684232	0	684232	intron_variant	1	0.36	5e-15	14.301		1.1	[1.07-1.14]	Illumina [~ 2600000] (imputed)	N
2013-09-16	23535732	Eeles RA	2013-04-01	Nat Genet	www.ncbi.nlm.nih.gov/pubmed/23535732	Identification of 23 new prostate cancer susceptibility loci using the iCOGS custom genotyping array.	Prostate cancer	11,085 European ancestry cases, 11,463 European ancestry controls	11,085 European ancestry cases, 11,464 European ancestry controls	11,085 European ancestry cases, 11,465 European ancestry controls	5	173512423	BOD1, FAM44B, LOC285593, STC2	LOC105377732			105377732			rs6869841T	rs6869841	0	6869841	intergenic_variant	0	0.21	5e-08	7.30103		1.07	[1.04-1.11]	Illumina [~ 2600000] (imputed)	N
2016-07-15	26034056	Hoffmann TJ	2015-06-01	Cancer Discov	www.ncbi.nlm.nih.gov/pubmed/26034056	A large multi-ethnic genome-wide association study of prostate cancer identifies novel risk variants and substantial ethnic differences.	Prostate cancer	6,406 European ancestry cases, 601 African American cases, 288 East Asian ancestry cases, 488 Latino cases30,866 European ancestry controls, 1,650 African American controls, 2,938 East Asian ancestry controls, 3,141 Latino controls	6,406 European ancestry cases, 601 African American cases, 288 East Asian ancestry cases, 488 Latino cases30,866 European ancestry controls, 1,650 African American controls, 2,938 East Asian ancestry controls, 3,142 Latino controls	6,406 European ancestry cases, 601 African American cases, 288 East Asian ancestry cases, 488 Latino cases30,866 European ancestry controls, 1,650 African American controls, 2,938 East Asian ancestry controls, 3,143 Latino controls	8	127401060	NR	CASC8, CCAT2			727677, 101805488			rs6983267G	rs6983267	0	6983267	non_coding_transcript_exon_variant	0	0.51	3e-27	26.5229		1.25	[1.20-1.30]	Affymetrix [up to 19977088] (imputed)	N
2016-07-15	26034056	Hoffmann TJ	2015-06-01	Cancer Discov	www.ncbi.nlm.nih.gov/pubmed/26034056	A large multi-ethnic genome-wide association study of prostate cancer identifies novel risk variants and substantial ethnic differences.	Prostate cancer	6,406 European ancestry cases, 601 African American cases, 288 East Asian ancestry cases, 488 Latino cases30,866 European ancestry controls, 1,650 African American controls, 2,938 East Asian ancestry controls, 3,141 Latino controls	6,406 European ancestry cases, 601 African American cases, 288 East Asian ancestry cases, 488 Latino cases30,866 European ancestry controls, 1,650 African American controls, 2,938 East Asian ancestry controls, 3,142 Latino controls	6,406 European ancestry cases, 601 African American cases, 288 East Asian ancestry cases, 488 Latino cases30,866 European ancestry controls, 1,650 African American controls, 2,938 East Asian ancestry controls, 3,143 Latino controls	8	127094635	NR	PRNCR1 - LOC105375752	101867536	105375752		2040	45423	rs6983561C	rs6983561	0	6983561	intron_variant	1	0.035	6e-22	21.2218		1.45	[1.34-1.56]	Affymetrix [up to 19977088] (imputed)	N
2014-11-09	24740154	Lange EM	2014-04-16	PLoS One	www.ncbi.nlm.nih.gov/pubmed/24740154	Genome-wide association scan for variants associated with early-onset prostate cancer.	Prostate cancer (early onset)	931 European ancestry cases, 4,120 European ancestry controls	932 European ancestry cases, 4,120 European ancestry controls	933 European ancestry cases, 4,120 European ancestry controls	11	2207722	TH	TH - ASCL2	7054	430		33641	60776	rs7126629C	rs7126629	0	7126629	intergenic_variant	1	0.21	2e-08	7.69897		1.44	[1.31-1.57]	Illumina [2639562] (imputed)	N
2016-02-12	25939597	Berndt SI	2015-05-05	Nat Commun	www.ncbi.nlm.nih.gov/pubmed/25939597	Two susceptibility loci identified for prostate cancer aggressiveness.	Prostate cancer	4,600 European ancestry cases, 2,941 European ancestry controls	4,600 European ancestry cases, 2,942 European ancestry controls	4,600 European ancestry cases, 2,943 European ancestry controls	3	170281428	PRKCI	PRKCI			5584			rs71277158T	rs71277158	0	71277158	non_coding_transcript_exon_variant	0	0.82	8e-14	13.0969		1.22	[1.15-1.28]	Illumina [1531807] (imputed)	N
2012-03-31	22219177	Tao S	2012-01-04	Carcinogenesis	www.ncbi.nlm.nih.gov/pubmed/22219177	A genome-wide search for loci interacting with known prostate cancer risk-associated genetic variants.	Prostate cancer (SNP x SNP interaction)	4,723 European ancestry cases, 4,792 European ancestry controls	4,723 European ancestry cases, 4,793 European ancestry controls	4,723 European ancestry cases, 4,794 European ancestry controls	22 x 11	40279087 x 2212344	TNRC6B x IGF2, IGF2AS, INS, TH	TNRC6B x TH - ASCL2						rs7127900A	rs7127900	0		intron_variant		NR	4e-06	5.39794		1.3	[1.16-1.46]	Affymetrix, Illumina [1117531] (imputed)	N
2011-07-30	21743057	Schumacher FR	2011-07-08	Hum Mol Genet	www.ncbi.nlm.nih.gov/pubmed/21743057	Genome-wide association study identifies new prostate cancer susceptibility loci.	Prostate cancer	2,782 European ancestry cases, 4,458 European ancestry controls	2,782 European ancestry cases, 4,459 European ancestry controls	2,782 European ancestry cases, 4,460 European ancestry controls	11	69228491	intergenic	LOC105369366 - LOC105369367	105369366	105369367		50484	258	rs7130881G	rs7130881	0	7130881	intergenic_variant	1	NR	9e-09	8.04576		1.31	[1.20-1.44]	Illumina [571243]	N
2013-09-16	23535732	Eeles RA	2013-04-01	Nat Genet	www.ncbi.nlm.nih.gov/pubmed/23535732	Identification of 23 new prostate cancer susceptibility loci using the iCOGS custom genotyping array.	Prostate cancer	11,085 European ancestry cases, 11,463 European ancestry controls	11,085 European ancestry cases, 11,464 European ancestry controls	11,085 European ancestry cases, 11,465 European ancestry controls	14	68660027	RAD51B, ZFP36L1, ACTN1	RAD51B			5890			rs7141529C	rs7141529	0	7141529	intron_variant	0	0.5	3e-10	9.52288		1.09	[1.06-1.12]	Illumina [~ 2600000] (imputed)	N
2015-05-07	25217961	Al Olama AA	2014-09-14	Nat Genet	www.ncbi.nlm.nih.gov/pubmed/25217961	A meta-analysis of 87,040 individuals identifies 23 new susceptibility loci for prostate cancer.	Prostate cancer	34,379 European ancestry cases, 33,164 European ancestry controls, 5,327 African ancestry cases, 5,136 African ancestry controls, 2,563 Japanese ancestry cases, 4,391 Japanese ancestry controls, 1,034 Latino cases, 1,046 Latino controls	34,379 European ancestry cases, 33,164 European ancestry controls, 5,327 African ancestry cases, 5,136 African ancestry controls, 2,563 Japanese ancestry cases, 4,391 Japanese ancestry controls, 1,034 Latino cases, 1,047 Latino controls	34,379 European ancestry cases, 33,164 European ancestry controls, 5,327 African ancestry cases, 5,136 African ancestry controls, 2,563 Japanese ancestry cases, 4,391 Japanese ancestry controls, 1,034 Latino cases, 1,048 Latino controls	14	60655808	SIX1	SIX1 - SIX4	6495	51804		6319	53730	rs7153648C	rs7153648	0	7153648	intron_variant	1	0.06	2e-09	8.69897		1.11	[1.07-1.14]	Affymetrix, Illumina [up to 16852405] (imputed)	N
2011-06-03	21602798	Haiman CA	2011-05-22	Nat Genet	www.ncbi.nlm.nih.gov/pubmed/21602798	Genome-wide association study of prostate cancer in men of African ancestry identifies a susceptibility locus at 17q21.	Prostate cancer	3,425 African American cases, 3,290 African American controls	3,425 African American cases, 3,291 African American controls	3,425 African American cases, 3,292 African American controls	17	49359387	ZNF652	ZNF652			22834			rs7210100A	rs7210100	0	7210100	intron_variant	0	0.05	3e-13	12.5229		1.51	[1.35-1.69]	Illumina [10471986]	N
2008-06-16	18264098	Gudmundsson J	2008-02-10	Nat Genet	www.ncbi.nlm.nih.gov/pubmed/18264098	Common sequence variants on 2p15 and Xp11.22 confer susceptibility to prostate cancer.	Prostate cancer	1,854 European ancestry cases, 21,372 European ancestry controls	1,854 European ancestry cases, 21,373 European ancestry controls	1,854 European ancestry cases, 21,374 European ancestry controls	2	62904596	EHBP1	EHBP1			23301			rs721048A	rs721048	0	721048	intron_variant	0	0.19	8e-09	8.09691		1.15	[1.10-1.21]	Illumina [310520]	N
2013-09-16	23535732	Eeles RA	2013-04-01	Nat Genet	www.ncbi.nlm.nih.gov/pubmed/23535732	Identification of 23 new prostate cancer susceptibility loci using the iCOGS custom genotyping array.	Prostate cancer	11,085 European ancestry cases, 11,463 European ancestry controls	11,085 European ancestry cases, 11,464 European ancestry controls	11,085 European ancestry cases, 11,465 European ancestry controls	18	79013973	SALL3, ATP9B	LOC105372225			105372225			rs7241993C	rs7241993	0	7241993	intergenic_variant	0	0.7	2e-09	8.69897		1.09	[1.05-1.12]	Illumina [~ 2600000] (imputed)	N
2012-03-31	22219177	Tao S	2012-01-04	Carcinogenesis	www.ncbi.nlm.nih.gov/pubmed/22219177	A genome-wide search for loci interacting with known prostate cancer risk-associated genetic variants.	Prostate cancer (SNP x SNP interaction)	4,723 European ancestry cases, 4,792 European ancestry controls	4,723 European ancestry cases, 4,793 European ancestry controls	4,723 European ancestry cases, 4,794 European ancestry controls	1 x 17	37731169 x 37738049	EPHA10 x HNF1B	EPHA10 x HNF1B						rs731174C	rs731174	0		intron_variant		NR	5e-06	5.30103		1.27	[1.15-1.40]	Affymetrix, Illumina [1117531] (imputed)	N
2012-03-31	22219177	Tao S	2012-01-04	Carcinogenesis	www.ncbi.nlm.nih.gov/pubmed/22219177	A genome-wide search for loci interacting with known prostate cancer risk-associated genetic variants.	Prostate cancer (SNP x SNP interaction)	4,723 European ancestry cases, 4,792 European ancestry controls	4,723 European ancestry cases, 4,793 European ancestry controls	4,723 European ancestry cases, 4,794 European ancestry controls	4 x 19	5757142 x 41479716	EVC x PPP1R14A	EVC x PCAT19						rs735172C	rs735172	0		intron_variant		NR	2e-06	5.69897		1.31	[1.17-1.46]	Affymetrix, Illumina [1117531] (imputed)	N
2011-07-30	21743057	Schumacher FR	2011-07-08	Hum Mol Genet	www.ncbi.nlm.nih.gov/pubmed/21743057	Genome-wide association study identifies new prostate cancer susceptibility loci.	Prostate cancer	2,782 European ancestry cases, 4,458 European ancestry controls	2,782 European ancestry cases, 4,459 European ancestry controls	2,782 European ancestry cases, 4,460 European ancestry controls	22	43122269	BIK	BIK			638			rs742134G	rs742134	0	742134	intron_variant	0	NR	6e-06	5.22185	(conditioned on rs5759167)	1.16	[1.01-1.23]	Illumina [571243]	N
2016-07-15	26034056	Hoffmann TJ	2015-06-01	Cancer Discov	www.ncbi.nlm.nih.gov/pubmed/26034056	A large multi-ethnic genome-wide association study of prostate cancer identifies novel risk variants and substantial ethnic differences.	Prostate cancer	6,406 European ancestry cases, 601 African American cases, 288 East Asian ancestry cases, 488 Latino cases30,866 European ancestry controls, 1,650 African American controls, 2,938 East Asian ancestry controls, 3,141 Latino controls	6,406 European ancestry cases, 601 African American cases, 288 East Asian ancestry cases, 488 Latino cases30,866 European ancestry controls, 1,650 African American controls, 2,938 East Asian ancestry controls, 3,142 Latino controls	6,406 European ancestry cases, 601 African American cases, 288 East Asian ancestry cases, 488 Latino cases30,866 European ancestry controls, 1,650 African American controls, 2,938 East Asian ancestry controls, 3,143 Latino controls	17	37741165	NR	HNF1B			6928			rs7501939C	rs7501939	0	7501939	intron_variant	0	0.6	4e-15	14.3979		1.17	[1.13-1.22]	Affymetrix [up to 19977088] (imputed)	N
2011-08-22	21743467	Kote-Jarai Z	2011-07-10	Nat Genet	www.ncbi.nlm.nih.gov/pubmed/21743467	Seven prostate cancer susceptibility loci identified by a multi-stage genome-wide association study.	Prostate cancer	6,621 European ancestry cases, 6,939 European ancestry controls	6,621 European ancestry cases, 6,940 European ancestry controls	6,621 European ancestry cases, 6,941 European ancestry controls	2	237478585	intergenic	COL6A3 - LOC105373957	1293	105373957		43763	7115	rs7584330G	rs7584330	0	7584330	intergenic_variant	1	0.22	3e-09	8.52288		1.06	[1.02-1.09]	NR [2600000] (imputed)	N
2013-09-16	23535732	Eeles RA	2013-04-01	Nat Genet	www.ncbi.nlm.nih.gov/pubmed/23535732	Identification of 23 new prostate cancer susceptibility loci using the iCOGS custom genotyping array.	Prostate cancer	11,085 European ancestry cases, 11,463 European ancestry controls	11,085 European ancestry cases, 11,464 European ancestry controls	11,085 European ancestry cases, 11,465 European ancestry controls			WDR52-AS1, ATP6V1A, BOC, KIAA2018, MIR4446, NAA50, SIDT1, SPICE1, WDR52, WDR52-AS							rs7611694A	rs7611694	0	7611694	intron_variant	1	0.59	4e-13	12.3979		1.1	[1.08-1.14]	Illumina [~ 2600000] (imputed)	N
2011-07-30	21743057	Schumacher FR	2011-07-08	Hum Mol Genet	www.ncbi.nlm.nih.gov/pubmed/21743057	Genome-wide association study identifies new prostate cancer susceptibility loci.	Prostate cancer	2,782 European ancestry cases, 4,458 European ancestry controls	2,782 European ancestry cases, 4,459 European ancestry controls	2,782 European ancestry cases, 4,460 European ancestry controls	3	87192347	intergenic	LINC00506 - MIR4795	100846978	100616161		35278	33842	rs7629490T	rs7629490	0	7629490	intergenic_variant	1	NR	1e-07	7	(conditioned on rs2660753)	1.06	[1.04-1.09]	Illumina [571243]	N
2012-03-31	22219177	Tao S	2012-01-04	Carcinogenesis	www.ncbi.nlm.nih.gov/pubmed/22219177	A genome-wide search for loci interacting with known prostate cancer risk-associated genetic variants.	Prostate cancer (SNP x SNP interaction)	4,723 European ancestry cases, 4,792 European ancestry controls	4,723 European ancestry cases, 4,793 European ancestry controls	4,723 European ancestry cases, 4,794 European ancestry controls	22 x 4	22490916 x 105140377	ZNF280B x TET2	ZNF280B, IGL x LOC100288146 - TET2						rs7679673A	rs7679673	0		intron_variant		NR	4e-06	5.39794		1.44	[1.23-1.67]	Affymetrix, Illumina [1117531] (imputed)	N
2015-05-07	25217961	Al Olama AA	2014-09-14	Nat Genet	www.ncbi.nlm.nih.gov/pubmed/25217961	A meta-analysis of 87,040 individuals identifies 23 new susceptibility loci for prostate cancer.	Prostate cancer	34,379 European ancestry cases, 33,164 European ancestry controls, 5,327 African ancestry cases, 5,136 African ancestry controls, 2,563 Japanese ancestry cases, 4,391 Japanese ancestry controls, 1,034 Latino cases, 1,046 Latino controls	34,379 European ancestry cases, 33,164 European ancestry controls, 5,327 African ancestry cases, 5,136 African ancestry controls, 2,563 Japanese ancestry cases, 4,391 Japanese ancestry controls, 1,034 Latino cases, 1,047 Latino controls	34,379 European ancestry cases, 33,164 European ancestry controls, 5,327 African ancestry cases, 5,136 African ancestry controls, 2,563 Japanese ancestry cases, 4,391 Japanese ancestry controls, 1,034 Latino cases, 1,048 Latino controls	10	45587537	43167	43167			220972			rs76934034T	rs76934034	0	76934034	intron_variant	0	0.91	5e-09	8.30103	(EA)	1.14	[1.10-1.18]	Affymetrix, Illumina [up to 16852405] (imputed)	N
2012-03-31	22219177	Tao S	2012-01-04	Carcinogenesis	www.ncbi.nlm.nih.gov/pubmed/22219177	A genome-wide search for loci interacting with known prostate cancer risk-associated genetic variants.	Prostate cancer (SNP x SNP interaction)	4,723 European ancestry cases, 4,792 European ancestry controls	4,723 European ancestry cases, 4,793 European ancestry controls	4,723 European ancestry cases, 4,794 European ancestry controls	4 x 8	113079800 x 126999692	ANK2 x NR	ANK2 x LOC105375751						rs7694725T	rs7694725	0		intron_variant		NR	2e-06	5.69897		1.36	[1.20-1.55]	Affymetrix, Illumina [1117531] (imputed)	N
2012-03-31	22219177	Tao S	2012-01-04	Carcinogenesis	www.ncbi.nlm.nih.gov/pubmed/22219177	A genome-wide search for loci interacting with known prostate cancer risk-associated genetic variants.	Prostate cancer (SNP x SNP interaction)	4,723 European ancestry cases, 4,792 European ancestry controls	4,723 European ancestry cases, 4,793 European ancestry controls	4,723 European ancestry cases, 4,794 European ancestry controls	5 x 3	67537429 x 87061524	CD180 x NR	LOC101928819 - RPL21P55 x LOC285232 - LINC00506						rs7717572A	rs7717572	0		intron_variant		NR	3e-06	5.52288		1.94	[1.47-2.56]	Affymetrix, Illumina [1117531] (imputed)	N
2016-02-12	25939597	Berndt SI	2015-05-05	Nat Commun	www.ncbi.nlm.nih.gov/pubmed/25939597	Two susceptibility loci identified for prostate cancer aggressiveness.	Prostate cancer	4,600 European ancestry cases, 2,941 European ancestry controls	4,600 European ancestry cases, 2,942 European ancestry controls	4,600 European ancestry cases, 2,943 European ancestry controls	5	1282299	TERT, hTERT	TERT			7015			rs7725218G	rs7725218	0	7725218	intron_variant	0	0.64	3e-11	10.5229		1.15	[1.10-1.19]	Illumina [1531807] (imputed)	N
2016-02-12	25939597	Berndt SI	2015-05-05	Nat Commun	www.ncbi.nlm.nih.gov/pubmed/25939597	Two susceptibility loci identified for prostate cancer aggressiveness.	Prostate cancer	4,600 European ancestry cases, 2,941 European ancestry controls	4,600 European ancestry cases, 2,942 European ancestry controls	4,600 European ancestry cases, 2,943 European ancestry controls	6	160419220	SLC22A3	SLC22A3			6581			rs7758229T	rs7758229	0	7758229	intron_variant	0	0.31	4e-12	11.3979		1.15	[1.10鈥?.20]	Illumina [1531807] (imputed)	N
2012-03-31	22219177	Tao S	2012-01-04	Carcinogenesis	www.ncbi.nlm.nih.gov/pubmed/22219177	A genome-wide search for loci interacting with known prostate cancer risk-associated genetic variants.	Prostate cancer (SNP x SNP interaction)	4,723 European ancestry cases, 4,792 European ancestry controls	4,723 European ancestry cases, 4,793 European ancestry controls	4,723 European ancestry cases, 4,794 European ancestry controls	7 x 8	40925528 x 127472793	INHBA x NR	LOC105375242 - LINC01450 x CASC8						rs7789197A	rs7789197	0		intergenic_variant		NR	3e-06	5.52288		1.5152	[1.27-1.79]	Affymetrix, Illumina [1117531] (imputed)	N
2010-09-11	20676098	Takata R	2010-08-01	Nat Genet	www.ncbi.nlm.nih.gov/pubmed/20676098	Genome-wide association study identifies five new susceptibility loci for prostate cancer in the Japanese population.	Prostate cancer	1,583 Japanese ancestry cases, 3,386 Japanese ancestry controls	1,583 Japanese ancestry cases, 3,387 Japanese ancestry controls	1,583 Japanese ancestry cases, 3,388 Japanese ancestry controls	8	127527115	intergenic	CASC8 - LOC105375754	727677	105375754		44976	137424	rs7837688T	rs7837688	0	7837688	intergenic_variant	1	NR	1e-25	25				Illumina [510687]	N
2012-03-31	22219177	Tao S	2012-01-04	Carcinogenesis	www.ncbi.nlm.nih.gov/pubmed/22219177	A genome-wide search for loci interacting with known prostate cancer risk-associated genetic variants.	Prostate cancer (SNP x SNP interaction)	4,723 European ancestry cases, 4,792 European ancestry controls	4,723 European ancestry cases, 4,793 European ancestry controls	4,723 European ancestry cases, 4,794 European ancestry controls	15 x 11	48747600 x 69167951	CEP152 x MYEOV	CEP152 x LOC338694, LOC105369366						rs784411C	rs784411	0		intron_variant		NR	1e-07	7		1.42	[1.25-1.61]	Affymetrix, Illumina [1117531] (imputed)	N
2012-03-31	22219177	Tao S	2012-01-04	Carcinogenesis	www.ncbi.nlm.nih.gov/pubmed/22219177	A genome-wide search for loci interacting with known prostate cancer risk-associated genetic variants.	Prostate cancer (SNP x SNP interaction)	4,723 European ancestry cases, 4,792 European ancestry controls	4,723 European ancestry cases, 4,793 European ancestry controls	4,723 European ancestry cases, 4,794 European ancestry controls	9 x 3	115068533 x 128319530	TNC x EEFSEC	TNC x EEFSEC						rs7847271A	rs7847271	0		intron_variant		NR	4e-06	5.39794		1.4925	[1.27-1.79]	Affymetrix, Illumina [1117531] (imputed)	N
2016-02-13	25939597	Berndt SI	2015-05-05	Nat Commun	www.ncbi.nlm.nih.gov/pubmed/25939597	Two susceptibility loci identified for prostate cancer aggressiveness.	Prostate cancer aggressiveness	4,545 European ancestry cases	4,546 European ancestry cases	4,547 European ancestry cases	3	175534948	NAALADL2	NAALADL2			254827			rs78943174C	rs78943174	0	78943174	intron_variant	0	0.987	4e-08	7.39794		0.289	[0.19-0.39] unit increase	Illumina [1531807] (imputed)	N
2016-02-12	25939597	Berndt SI	2015-05-05	Nat Commun	www.ncbi.nlm.nih.gov/pubmed/25939597	Two susceptibility loci identified for prostate cancer aggressiveness.	Prostate cancer	4,600 European ancestry cases, 2,941 European ancestry controls	4,600 European ancestry cases, 2,942 European ancestry controls	4,600 European ancestry cases, 2,943 European ancestry controls	11	69218116	LOC338694, MYEOV	LOC105369366 - LOC105369367	105369366	105369367		40109	10633	rs7929962T	rs7929962	0	7929962	intergenic_variant	1	0.51	2e-13	12.699		1.15	[1.11鈥?.19]	Illumina [1531807] (imputed)	N
2017-02-03	27197191	Fehringer G	2016-04-20	Cancer Res	www.ncbi.nlm.nih.gov/pubmed/27197191	Cross-cancer genome-wide analysis of lung, ovary, breast, prostate and colorectal cancer reveals novel pleiotropic associations.	Cancer (pleiotropy)	5,020 European ancestry lung cancer cases, 3,718 European ancestry lung adenocarcinoma cases, 3,422 European ancestry lung squamous cell carcinoma cases, 15,414 European ancestry colorectal cancer cases, 10,809 European ancestry breast cancer cases, 4,939 European ancestry estrogen receptor negative breast cancer cases, 1,098 European ancestry ovarian cancer cases, 2,556 European ancestry serous …	5,020 European ancestry lung cancer cases, 3,718 European ancestry lung adenocarcinoma cases, 3,422 European ancestry lung squamous cell carcinoma cases, 15,414 European ancestry colorectal cancer cases, 10,809 European ancestry breast cancer cases, 4,939 European ancestry estrogen receptor negative breast cancer cases, 1,098 European ancestry ovarian cancer cases, 2,556 European ancestry serous …	5,020 European ancestry lung cancer cases, 3,718 European ancestry lung adenocarcinoma cases, 3,422 European ancestry lung squamous cell carcinoma cases, 15,414 European ancestry colorectal cancer cases, 10,809 European ancestry breast cancer cases, 4,939 European ancestry estrogen receptor negative breast cancer cases, 1,098 European ancestry ovarian cancer cases, 2,556 European ancestry serous …	11	69227030	Intergenic	LOC105369366 - LOC105369367	105369366	105369367		49023	1719	rs7931342G	rs7931342	0	7931342	intergenic_variant	1	NR	4e-14	13.3979	(subset analysis)			Affymetrix, Illumina [9916564] (imputed)	N
2013-09-16	23535732	Eeles RA	2013-04-01	Nat Genet	www.ncbi.nlm.nih.gov/pubmed/23535732	Identification of 23 new prostate cancer susceptibility loci using the iCOGS custom genotyping array.	Prostate cancer	11,085 European ancestry cases, 11,463 European ancestry controls	11,085 European ancestry cases, 11,464 European ancestry controls	11,085 European ancestry cases, 11,465 European ancestry controls	14	52905612	DDHD1, ERO1L, TXNDC16, FERMT2, GNPNAT1, GPR137C, PSMC6, STYX	FERMT2, LOC105370500			10979, 105370500			rs8008270C	rs8008270	0	8008270	intron_variant	0	0.82	2e-14	13.699		1.12	[1.08-1.16]	Illumina [~ 2600000] (imputed)	N
2015-05-07	25217961	Al Olama AA	2014-09-14	Nat Genet	www.ncbi.nlm.nih.gov/pubmed/25217961	A meta-analysis of 87,040 individuals identifies 23 new susceptibility loci for prostate cancer.	Prostate cancer	34,379 European ancestry cases, 33,164 European ancestry controls, 5,327 African ancestry cases, 5,136 African ancestry controls, 2,563 Japanese ancestry cases, 4,391 Japanese ancestry controls, 1,034 Latino cases, 1,046 Latino controls	34,379 European ancestry cases, 33,164 European ancestry controls, 5,327 African ancestry cases, 5,136 African ancestry controls, 2,563 Japanese ancestry cases, 4,391 Japanese ancestry controls, 1,034 Latino cases, 1,047 Latino controls	34,379 European ancestry cases, 33,164 European ancestry controls, 5,327 African ancestry cases, 5,136 African ancestry controls, 2,563 Japanese ancestry cases, 4,391 Japanese ancestry controls, 1,034 Latino cases, 1,048 Latino controls	12	48025835	RP1-228P16.4	LOC105369750			105369750			rs80130819A	rs80130819	0	80130819	upstream_gene_variant	0	0.91	4e-08	7.39794	(EA)	1.13	[1.08-1.17]	Affymetrix, Illumina [up to 16852405] (imputed)	N
2015-05-07	25217961	Al Olama AA	2014-09-14	Nat Genet	www.ncbi.nlm.nih.gov/pubmed/25217961	A meta-analysis of 87,040 individuals identifies 23 new susceptibility loci for prostate cancer.	Prostate cancer	34,379 European ancestry cases, 33,164 European ancestry controls, 5,327 African ancestry cases, 5,136 African ancestry controls, 2,563 Japanese ancestry cases, 4,391 Japanese ancestry controls, 1,034 Latino cases, 1,046 Latino controls	34,379 European ancestry cases, 33,164 European ancestry controls, 5,327 African ancestry cases, 5,136 African ancestry controls, 2,563 Japanese ancestry cases, 4,391 Japanese ancestry controls, 1,034 Latino cases, 1,047 Latino controls	34,379 European ancestry cases, 33,164 European ancestry controls, 5,327 African ancestry cases, 5,136 African ancestry controls, 2,563 Japanese ancestry cases, 4,391 Japanese ancestry controls, 1,034 Latino cases, 1,048 Latino controls	14	70625539	TTC9	LOC101928075			101928075			rs8014671G	rs8014671	0	8014671	intron_variant	0	0.59	1e-08	8	(EA)	1.07	[1.05-1.10]	Affymetrix, Illumina [up to 16852405] (imputed)	N
2012-03-31	22219177	Tao S	2012-01-04	Carcinogenesis	www.ncbi.nlm.nih.gov/pubmed/22219177	A genome-wide search for loci interacting with known prostate cancer risk-associated genetic variants.	Prostate cancer (SNP x SNP interaction)	4,723 European ancestry cases, 4,792 European ancestry controls	4,723 European ancestry cases, 4,793 European ancestry controls	4,723 European ancestry cases, 4,794 European ancestry controls	16 x 7	49360365 x 98187015	C16orf78 x LMTK2	LOC105371243 - C16orf78 x LMTK2						rs8057939C	rs8057939	0		intergenic_variant		NR	5e-06	5.30103		1.37	[1.20-1.57]	Affymetrix, Illumina [1117531] (imputed)	N
2016-02-12	25939597	Berndt SI	2015-05-05	Nat Commun	www.ncbi.nlm.nih.gov/pubmed/25939597	Two susceptibility loci identified for prostate cancer aggressiveness.	Prostate cancer	4,600 European ancestry cases, 2,941 European ancestry controls	4,600 European ancestry cases, 2,942 European ancestry controls	4,600 European ancestry cases, 2,943 European ancestry controls	17	37741595	HNF1B	HNF1B			6928			rs8064454C	rs8064454	0	8064454	intron_variant	0	0.52	8e-29	28.0969		1.24	[1.19鈥?.29]	Illumina [1531807] (imputed)	N
2012-03-31	22219177	Tao S	2012-01-04	Carcinogenesis	www.ncbi.nlm.nih.gov/pubmed/22219177	A genome-wide search for loci interacting with known prostate cancer risk-associated genetic variants.	Prostate cancer (SNP x SNP interaction)	4,723 European ancestry cases, 4,792 European ancestry controls	4,723 European ancestry cases, 4,793 European ancestry controls	4,723 European ancestry cases, 4,794 European ancestry controls	1 x 19	29712815 x 38244973	PTPRU x NR	LOC107984934 - LOC101929406 x DPF1 - PPP1R14A						rs8102476C	rs8102476	0		upstream_gene_variant		NR	5e-06	5.30103		1.2195	[1.12-1.33]	Affymetrix, Illumina [1117531] (imputed)	N
2012-12-11	23023329	Xu J	2012-09-30	Nat Genet	www.ncbi.nlm.nih.gov/pubmed/23023329	Genome-wide association study in Chinese men identifies two new prostate cancer risk loci at 9q31.2 and 19q13.4.	Prostate cancer	1,417 Han Chinese ancestry cases, 1,008 Han Chinese ancestry controls	1,417 Han Chinese ancestry cases, 1,009 Han Chinese ancestry controls	1,417 Han Chinese ancestry cases, 1,010 Han Chinese ancestry controls	9	107394019	KLF4, RAD23B	LOC107987111 - LINC01509	107987111	101928720		10562	26265	rs817826C	rs817826	0	817826	intergenic_variant	1	0.084	5e-14	13.301		1.41	[1.29-1.54]	Illumina [587294]	N
2012-03-31	22219177	Tao S	2012-01-04	Carcinogenesis	www.ncbi.nlm.nih.gov/pubmed/22219177	A genome-wide search for loci interacting with known prostate cancer risk-associated genetic variants.	Prostate cancer (SNP x SNP interaction)	4,723 European ancestry cases, 4,792 European ancestry controls	4,723 European ancestry cases, 4,793 European ancestry controls	4,723 European ancestry cases, 4,794 European ancestry controls	5 x 19	13505322 x 41479716	DNAH5 x PPP1R14A	LOC105374660 x PCAT19						rs887391T	rs887391	0		intergenic_variant		NR	2e-06	5.69897		1.5625	[1.3-1.89]	Affymetrix, Illumina [1117531] (imputed)	N
2016-07-15	26034056	Hoffmann TJ	2015-06-01	Cancer Discov	www.ncbi.nlm.nih.gov/pubmed/26034056	A large multi-ethnic genome-wide association study of prostate cancer identifies novel risk variants and substantial ethnic differences.	Prostate cancer	6,406 European ancestry cases, 601 African American cases, 288 East Asian ancestry cases, 488 Latino cases30,866 European ancestry controls, 1,650 African American controls, 2,938 East Asian ancestry controls, 3,141 Latino controls	6,406 European ancestry cases, 601 African American cases, 288 East Asian ancestry cases, 488 Latino cases30,866 European ancestry controls, 1,650 African American controls, 2,938 East Asian ancestry controls, 3,142 Latino controls	6,406 European ancestry cases, 601 African American cases, 288 East Asian ancestry cases, 488 Latino cases30,866 European ancestry controls, 1,650 African American controls, 2,938 East Asian ancestry controls, 3,143 Latino controls	12	52880120	NR	KRT78 - RPL7P41	196374	100271222		31126	5639	rs902774A	rs902774	0	902774	intergenic_variant	1	0.15	9e-08	7.04576		1.16	[1.10-1.23]	Affymetrix [up to 19977088] (imputed)	N
2010-09-11	20676098	Takata R	2010-08-01	Nat Genet	www.ncbi.nlm.nih.gov/pubmed/20676098	Genome-wide association study identifies five new susceptibility loci for prostate cancer in the Japanese population.	Prostate cancer	1,583 Japanese ancestry cases, 3,386 Japanese ancestry controls	1,583 Japanese ancestry cases, 3,387 Japanese ancestry controls	1,583 Japanese ancestry cases, 3,388 Japanese ancestry controls	3	87103019	intergenic	LINC00506			100846978			rs9284813G	rs9284813	0	9284813	intron_variant	0	NR	5e-09	8.30103				Illumina [510687]	N
2015-05-07	25217961	Al Olama AA	2014-09-14	Nat Genet	www.ncbi.nlm.nih.gov/pubmed/25217961	A meta-analysis of 87,040 individuals identifies 23 new susceptibility loci for prostate cancer.	Prostate cancer	34,379 European ancestry cases, 33,164 European ancestry controls, 5,327 African ancestry cases, 5,136 African ancestry controls, 2,563 Japanese ancestry cases, 4,391 Japanese ancestry controls, 1,034 Latino cases, 1,046 Latino controls	34,379 European ancestry cases, 33,164 European ancestry controls, 5,327 African ancestry cases, 5,136 African ancestry controls, 2,563 Japanese ancestry cases, 4,391 Japanese ancestry controls, 1,034 Latino cases, 1,047 Latino controls	34,379 European ancestry cases, 33,164 European ancestry controls, 5,327 African ancestry cases, 5,136 African ancestry controls, 2,563 Japanese ancestry cases, 4,391 Japanese ancestry controls, 1,034 Latino cases, 1,048 Latino controls	2	10570604	NOL10	LOC105373426 - NOL10	105373426	79954		23634	162	rs9287719C	rs9287719	0	9287719	downstream_gene_variant	1	0.46	3e-08	7.52288		1.06	[1.04-1.08]	Affymetrix, Illumina [up to 16852405] (imputed)	N
2008-09-17	17903305	Murabito JM	2007-09-19	BMC Med Genet	www.ncbi.nlm.nih.gov/pubmed/17903305	A genome-wide association study of breast and prostate cancer in the NHLBI's Framingham Heart Study.	Prostate cancer	59 cases, 558 controls	60 cases, 558 controls	61 cases, 558 controls	3	37954986	CTDSPL	CTDSPL			10217			rs9311171T	rs9311171	0	9311171	intron_variant	0	NR	2e-06	5.69897				Affymetrix [70897]	N
2012-03-31	22219177	Tao S	2012-01-04	Carcinogenesis	www.ncbi.nlm.nih.gov/pubmed/22219177	A genome-wide search for loci interacting with known prostate cancer risk-associated genetic variants.	Prostate cancer (SNP x SNP interaction)	4,723 European ancestry cases, 4,792 European ancestry controls	4,723 European ancestry cases, 4,793 European ancestry controls	4,723 European ancestry cases, 4,794 European ancestry controls	6 x 6	68584593 x 160412632	BAI3 x NR	LOC101928280 - LOC101928307 x SLC22A3						rs9351730G	rs9351730	0		intergenic_variant		NR	5e-06	5.30103		1.25	[1.13-1.37]	Affymetrix, Illumina [1117531] (imputed)	N
2016-07-15	26034056	Hoffmann TJ	2015-06-01	Cancer Discov	www.ncbi.nlm.nih.gov/pubmed/26034056	A large multi-ethnic genome-wide association study of prostate cancer identifies novel risk variants and substantial ethnic differences.	Prostate cancer	6,406 European ancestry cases, 601 African American cases, 288 East Asian ancestry cases, 488 Latino cases30,866 European ancestry controls, 1,650 African American controls, 2,938 East Asian ancestry controls, 3,141 Latino controls	6,406 European ancestry cases, 601 African American cases, 288 East Asian ancestry cases, 488 Latino cases30,866 European ancestry controls, 1,650 African American controls, 2,938 East Asian ancestry controls, 3,142 Latino controls	6,406 European ancestry cases, 601 African American cases, 288 East Asian ancestry cases, 488 Latino cases30,866 European ancestry controls, 1,650 African American controls, 2,938 East Asian ancestry controls, 3,143 Latino controls	6	160412632	SLC22A3	SLC22A3			6581			rs9364554T	rs9364554	0	9364554	intron_variant	0	0.279	6e-12	11.2218		1.14	[1.10-1.18]	Affymetrix [up to 19977088] (imputed)	N
2015-05-07	25217961	Al Olama AA	2014-09-14	Nat Genet	www.ncbi.nlm.nih.gov/pubmed/25217961	A meta-analysis of 87,040 individuals identifies 23 new susceptibility loci for prostate cancer.	Prostate cancer	34,379 European ancestry cases, 33,164 European ancestry controls, 5,327 African ancestry cases, 5,136 African ancestry controls, 2,563 Japanese ancestry cases, 4,391 Japanese ancestry controls, 1,034 Latino cases, 1,046 Latino controls	34,379 European ancestry cases, 33,164 European ancestry controls, 5,327 African ancestry cases, 5,136 African ancestry controls, 2,563 Japanese ancestry cases, 4,391 Japanese ancestry controls, 1,034 Latino cases, 1,047 Latino controls	34,379 European ancestry cases, 33,164 European ancestry controls, 5,327 African ancestry cases, 5,136 African ancestry controls, 2,563 Japanese ancestry cases, 4,391 Japanese ancestry controls, 1,034 Latino cases, 1,048 Latino controls	6	75786165	MYO6	MYO6			4646			rs9443189G	rs9443189	0	9443189	intron_variant	0	0.14	4e-08	7.39794		1.08	[1.05-1.11]	Affymetrix, Illumina [up to 16852405] (imputed)	N
2012-03-31	22219177	Tao S	2012-01-04	Carcinogenesis	www.ncbi.nlm.nih.gov/pubmed/22219177	A genome-wide search for loci interacting with known prostate cancer risk-associated genetic variants.	Prostate cancer (SNP x SNP interaction)	4,723 European ancestry cases, 4,792 European ancestry controls	4,723 European ancestry cases, 4,793 European ancestry controls	4,723 European ancestry cases, 4,794 European ancestry controls	13 x 2	44063269 x 43326810	NCRNA00284 x THADA	LINC00284 - LOC105370183 x THADA						rs9567349G	rs9567349	0		intergenic_variant		NR	4e-06	5.39794		1.6393	[1.33-2.04]	Affymetrix, Illumina [1117531] (imputed)	N
2010-09-11	20676098	Takata R	2010-08-01	Nat Genet	www.ncbi.nlm.nih.gov/pubmed/20676098	Genome-wide association study identifies five new susceptibility loci for prostate cancer in the Japanese population.	Prostate cancer	1,583 Japanese ancestry cases, 3,386 Japanese ancestry controls	1,583 Japanese ancestry cases, 3,387 Japanese ancestry controls	1,583 Japanese ancestry cases, 3,388 Japanese ancestry controls	13	73154002	intergenic	RNU6-66P - RNU7-89P	100873770	100873844		40984	14087	rs9600079T	rs9600079	0	9600079	intergenic_variant	1	0.38	3e-09	8.52288		1.18	[1.12-1.24]	Illumina [510687]	N
2009-02-26	19117981	Sun J	2009-01-01	Cancer Res	www.ncbi.nlm.nih.gov/pubmed/19117981	Sequence variants at 22q13 are associated with prostate cancer risk.	Prostate cancer	1,235 European ancestry aggressive cases, 1,599 European ancestry controls	1,235 European ancestry aggressive cases, 1,600 European ancestry controls	1,235 European ancestry aggressive cases, 1,601 European ancestry controls	22	40056115	TNRC6B	TNRC6B			23112			rs9623117C	rs9623117	0	9623117	intron_variant	0	0.21	5e-07	6.30103		1.18	[1.11-1.26]	Affymetrix, Illumina [~ 2000000] (imputed)	N
2012-03-31	22219177	Tao S	2012-01-04	Carcinogenesis	www.ncbi.nlm.nih.gov/pubmed/22219177	A genome-wide search for loci interacting with known prostate cancer risk-associated genetic variants.	Prostate cancer (SNP x SNP interaction)	4,723 European ancestry cases, 4,792 European ancestry controls	4,723 European ancestry cases, 4,793 European ancestry controls	4,723 European ancestry cases, 4,794 European ancestry controls	7 x 10	98391899 x 125008303	BAIAP2L1 x CTBP2	BAIAP2L1 x CTBP2						rs9649213G	rs9649213	0		intron_variant		NR	1e-06	6		1.28	[1.16-1.42]	Affymetrix, Illumina [1117531] (imputed)	N
2012-03-31	22219177	Tao S	2012-01-04	Carcinogenesis	www.ncbi.nlm.nih.gov/pubmed/22219177	A genome-wide search for loci interacting with known prostate cancer risk-associated genetic variants.	Prostate cancer (SNP x SNP interaction)	4,723 European ancestry cases, 4,792 European ancestry controls	4,723 European ancestry cases, 4,793 European ancestry controls	4,723 European ancestry cases, 4,794 European ancestry controls	3 x 4	86845328 x 94641726	VGLL3 x PDLIM5	LOC101927518 - LOC105377196 x PDLIM5						rs9757252T	rs9757252	0		intergenic_variant		NR	5e-06	5.30103		1.25	[1.13-1.37]	Affymetrix, Illumina [1117531] (imputed)	N
2012-03-31	22219177	Tao S	2012-01-04	Carcinogenesis	www.ncbi.nlm.nih.gov/pubmed/22219177	A genome-wide search for loci interacting with known prostate cancer risk-associated genetic variants.	Prostate cancer (SNP x SNP interaction)	4,723 European ancestry cases, 4,792 European ancestry controls	4,723 European ancestry cases, 4,793 European ancestry controls	4,723 European ancestry cases, 4,794 European ancestry controls	18 x 3	45145697 x 128319530	MIR4319 x EEFSEC	LOC105372091 x EEFSEC						rs998124G	rs998124	0		intron_variant		NR	5e-06	5.30103		1.33	[1.18-1.51]	Affymetrix, Illumina [1117531] (imputed)	N

## Sheet: Table S2
Code	Primer name	Sequence(5'--3')
Pcoc1	1218582A-F	TCCCAAGCACCAACACCATAAACCACCATCCGCCTGGGATGGATGCCATCTGGGT
Pcoc2	1218582A-R	GATCACCCAGATGGCATCCATCCCAGGCGGATGGTGGTTTATGGTGTTGGTGCTTGGGA
Pcoc3	1218582G-F	TCCCAAGCACCAACACCATAAACCACCGTCCGCCTGGGATGGATGCCATCTGGGT
Pcoc4	1218582G-R:	GATCACCCAGATGGCATCCATCCCAGGCGGACGGTGGTTTATGGTGTTGGTGCTTGGGA
Pcoc5	4245739A-F:	AGTACGAACATAAAAATGCATTTATTCAGTTCACTTACCACATTATTTGAAAATC
Pcoc6	4245739A-R	GATCGATTTTCAAATAATGTGGTAAGTGAACTGAATAAATGCATTTTTATGTTCGTACT
Pcoc7	4245739C-F	AGTACGAACATAAAAATGCATTTATTCCGTTCACTTACCACATTATTTGAAAATC
Pcoc8	4245739C-R	GATCGATTTTCAAATAATGTGGTAAGTGAACGGAATAAATGCATTTTTATGTTCGTACT
Pcoc9	11902236C-F	GAGGTGAATGTTAAGGTTCTCACTCCGCCCTCCGTGTCCTTGATCCAGGTGATGA
Pcoc10	11902236C-R:	GATCTCATCACCTGGATCAAGGACACGGAGGGCGGAGTGAGAACCTTAACATTCACCTC
Pcoc11	11902236T-F:	GAGGTGAATGTTAAGGTTCTCACTCCGTCCTCCGTGTCCTTGATCCAGGTGATGA
Pcoc12	11902236T-R:	GATCTCATCACCTGGATCAAGGACACGGAGGACGGAGTGAGAACCTTAACATTCACCTC
Pcoc13	1465618C-F:	CTCAATATTGTGAAGCCTTGGTGGGCTCCCTGGAAGAGAGAGGGAATTCACTTTG
Pcoc14	1465618C-R:	GATCCAAAGTGAATTCCCTCTCTCTTCCAGGGAGCCCACCAAGGCTTCACAATATTGAG
Pcoc15	1465618T-F	CTCAATATTGTGAAGCCTTGGTGGGCTTCCTGGAAGAGAGAGGGAATTCACTTTG
Pcoc16	1465618T-R	GATCCAAAGTGAATTCCCTCTCTCTTCCAGGAAGCCCACCAAGGCTTCACAATATTGAG
Pcoc17	721048A-F	CCCCTGAGGATTATCAAGGTCCCTTGGAGAATAAGGACCTCAGTGTGGAACAGGA
Pcoc18	721048A-R:	GATCTCCTGTTCCACACTGAGGTCCTTATTCTCCAAGGGACCTTGATAATCCTCAGGGG
Pcoc19	721048G-F	CCCCTGAGGATTATCAAGGTCCCTTGGGGAATAAGGACCTCAGTGTGGAACAGGA
Pcoc20	721048G-R	GATCTCCTGTTCCACACTGAGGTCCTTATTCCCCAAGGGACCTTGATAATCCTCAGGGG
Pcoc21	10187424C-F	TTGAAGACCCCAGGAGTTTCTAGGCCACCCACCGAGAACTATTGTCCTAAAGGAA
Pcoc22	10187424C-R:	GATCTTCCTTTAGGACAATAGTTCTCGGTGGGTGGCCTAGAAACTCCTGGGGTCTTCAA
Pcoc23	10187424T-F:	TTGAAGACCCCAGGAGTTTCTAGGCCATCCACCGAGAACTATTGTCCTAAAGGAA
Pcoc24	10187424T-R:	GATCTTCCTTTAGGACAATAGTTCTCGGTGGATGGCCTAGAAACTCCTGGGGTCTTCAA
Pcoc25	12621278A-F:	TTTCCTTGCTGCAGTAGACAGTGTTTTATTGTGGCTCTTTAAGAGATGTCTTAGT
Pcoc26	12621278A-R	GATCACTAAGACATCTCTTAAAGAGCCACAATAAAACACTGTCTACTGCAGCAAGGAAA
Pcoc27	12621278G-F	TTTCCTTGCTGCAGTAGACAGTGTTTTGTTGTGGCTCTTTAAGAGATGTCTTAGT
Pcoc28	12621278G-R:	GATCACTAAGACATCTCTTAAAGAGCCACAACAAAACACTGTCTACTGCAGCAAGGAAA
Pcoc29	7584330A-F:	AAAAACTGGTTTAGATATGGAAACTGAATGAGGGATTGTGATTTTTCATTGCAGC
Pcoc30	7584330A-R:	GATCGCTGCAATGAAAAATCACAATCCCTCATTCAGTTTCCATATCTAAACCAGTTTTT
Pcoc31	7584330G-F	AAAAACTGGTTTAGATATGGAAACTGAGTGAGGGATTGTGATTTTTCATTGCAGC
Pcoc32	7584330G-R	GATCGCTGCAATGAAAAATCACAATCCCTCACTCAGTTTCCATATCTAAACCAGTTTTT
Pcoc33	2292884A-F	TGCTGCAGATCTTTGAGCTGAATAAGCATATTTCAGCTGTGGAATGCCTGCTGAC
Pcoc34	2292884A-R	GATCGTCAGCAGGCATTCCACAGCTGAAATATGCTTATTCAGCTCAAAGATCTGCAGCA
Pcoc35	2292884G-F:	TGCTGCAGATCTTTGAGCTGAATAAGCGTATTTCAGCTGTGGAATGCCTGCTGAC
Pcoc36	2292884G-R	GATCGTCAGCAGGCATTCCACAGCTGAAATACGCTTATTCAGCTCAAAGATCTGCAGCA
Pcoc37	3771570C-F:	TGGTTGCAAAAAAAGCAGAACCAGACACACCATGGGCATCATTCTGTCCCAGGAC
Pcoc38	3771570C-R:	GATCGTCCTGGGACAGAATGATGCCCATGGTGTGTCTGGTTCTGCTTTTTTTGCAACCA
Pcoc39	3771570T-F:	TGGTTGCAAAAAAAGCAGAACCAGACATACCATGGGCATCATTCTGTCCCAGGAC
Pcoc40	3771570T-R:	GATCGTCCTGGGACAGAATGATGCCCATGGTATGTCTGGTTCTGCTTTTTTTGCAACCA
Pcoc41	2660753C-F:	AGCAAGGGCAAACAATCTGTCCTAAGTCATAGAAATAATAAGCAATAGACCCTCA
Pcoc42	2660753C-R:	GATCTGAGGGTCTATTGCTTATTATTTCTATGACTTAGGACAGATTGTTTGCCCTTGCT
Pcoc43	2660753T-F:	AGCAAGGGCAAACAATCTGTCCTAAGTTATAGAAATAATAAGCAATAGACCCTCA
Pcoc44	2660753T-R	GATCTGAGGGTCTATTGCTTATTATTTCTATAACTTAGGACAGATTGTTTGCCCTTGCT
Pcoc45	9284813A-F:	GCAGTTCATCAACTTTAATGTGTGGACATAGATAGAGCCATATACTATTATCTCC
Pcoc46	9284813A-R	GATCGGAGATAATAGTATATGGCTCTATCTATGTCCACACATTAAAGTTGATGAACTGC
Pcoc47	9284813G-F	GCAGTTCATCAACTTTAATGTGTGGACGTAGATAGAGCCATATACTATTATCTCC
Pcoc48	9284813G-R:	GATCGGAGATAATAGTATATGGCTCTATCTACGTCCACACATTAAAGTTGATGAACTGC
Pcoc49	17181170A-F	CTCTCAGATACTTTTACATGTGCGGGCATTCTTCATTCTTTTCATTCTCATGGTA
Pcoc50	17181170A-R:	GATCTACCATGAGAATGAAAAGAATGAAGAATGCCCGCACATGTAAAAGTATCTGAGAG
Pcoc51	17181170G-F:	CTCTCAGATACTTTTACATGTGCGGGCGTTCTTCATTCTTTTCATTCTCATGGTA
Pcoc52	17181170G-R:	GATCTACCATGAGAATGAAAAGAATGAAGAACGCCCGCACATGTAAAAGTATCTGAGAG
Pcoc53	7611694A-F:	TGGAAAGTTCCTAGTTACAGAGCTGTAAGTTAGTCTGTGGCTTCTGATTGGTATG
Pcoc54	7611694A-R:	GATCCATACCAATCAGAAGCCACAGACTAACTTACAGCTCTGTAACTAGGAACTTTCCA
Pcoc55	7611694C-F:	TGGAAAGTTCCTAGTTACAGAGCTGTACGTTAGTCTGTGGCTTCTGATTGGTATG
Pcoc56	7611694C-R	GATCCATACCAATCAGAAGCCACAGACTAACGTACAGCTCTGTAACTAGGAACTTTCCA
Pcoc57	7611694T-F:	TGGAAAGTTCCTAGTTACAGAGCTGTATGTTAGTCTGTGGCTTCTGATTGGTATG
Pcoc58	7611694T-R:	GATCTGGAAAGTTCCTAGTTACAGAGCTGTAAGTTAGTCTGTGGCTTCTGATTGGTATG
Pcoc59	10934853A-F:	TGGCCTGTGTGTTACAGGTTCTACCCTAAACAGACTTTGCACAAAGCGTATGCCC
Pcoc60	10934853A-R:	GATCGGGCATACGCTTTGTGCAAAGTCTGTTTAGGGTAGAACCTGTAACACACAGGCCA
Pcoc61	10934853C-F	TGGCCTGTGTGTTACAGGTTCTACCCTCAACAGACTTTGCACAAAGCGTATGCCC
Pcoc62	10934853C-R	GATCGGGCATACGCTTTGTGCAAAGTCTGTTGAGGGTAGAACCTGTAACACACAGGCCA
Pcoc63	6763931A-F	TGACAAAGCTTAAGTAATTCAGGCATGAGCATGGTTTTCTGAAAGTATAAAACAG
Pcoc64	6763931A-R	GATCCTGTTTTATACTTTCAGAAAACCATGCTCATGCCTGAATTACTTAAGCTTTGTCA
Pcoc65	6763931G-F	TGACAAAGCTTAAGTAATTCAGGCATGGGCATGGTTTTCTGAAAGTATAAAACAG
Pcoc66	6763931G-R	GATCCTGTTTTATACTTTCAGAAAACCATGCCCATGCCTGAATTACTTAAGCTTTGTCA
Pcoc67	10936632A-F	TTACAGGTGTGAACCACTGCGCCTGGCAGACAAACACCTGTTCTTTATTATTATT
Pcoc68	10936632A-R	GATCAATAATAATAAAGAACAGGTGTTTGTCTGCCAGGCGCAGTGGTTCACACCTGTAA
Pcoc69	10936632C-F:	TTACAGGTGTGAACCACTGCGCCTGGCCGACAAACACCTGTTCTTTATTATTATT
Pcoc70	10936632C-R	GATCAATAATAATAAAGAACAGGTGTTTGTCGGCCAGGCGCAGTGGTTCACACCTGTAA
Pcoc71	1894292A-F	AACAAACATAAATATGCTCCAATTAGTATATGCTCATTGGGAGGGAATCCATGAT
Pcoc72	1894292A-R：	GATCATCATGGATTCCCTCCCAATGAGCATATACTAATTGGAGCATATTTATGTTTGTT
Pcoc73	1894292G-F：	AACAAACATAAATATGCTCCAATTAGTGTATGCTCATTGGGAGGGAATCCATGAT
Pcoc74	1894292G-R：	GATCATCATGGATTCCCTCCCAATGAGCATACACTAATTGGAGCATATTTATGTTTGTT
Pcoc75	12500426A-F:	GAGTTGGTGTCTGTTGAGGCCTTTCCTAACGGTTGTGTATGGCCACTGTCTCACT
Pcoc76	12500426A-R	GATCAGTGAGACAGTGGCCATACACAACCGTTAGGAAAGGCCTCAACAGACACCAACTC
Pcoc77	12500426C-F	GAGTTGGTGTCTGTTGAGGCCTTTCCTCACGGTTGTGTATGGCCACTGTCTCACT
Pcoc78	12500426C-R	GATCAGTGAGACAGTGGCCATACACAACCGTGAGGAAAGGCCTCAACAGACACCAACTC
Pcoc79	17021918C-F	GCTATTTTTCCTTTAAATTGTATTTTTCAGAGTGAGCACCTGCTTAGTAAGAATT
Pcoc80	17021918C-R	GATCAATTCTTACTAAGCAGGTGCTCACTCTGAAAAATACAATTTAAAGGAAAAATAGC
Pcoc81	17021918T-F	GCTATTTTTCCTTTAAATTGTATTTTTTAGAGTGAGCACCTGCTTAGTAAGAATT
Pcoc82	17021918T-R	GATCAATTCTTACTAAGCAGGTGCTCACTCTAAAAAATACAATTTAAAGGAAAAATAGC
Pcoc83	7679673A-F	GGCTTAAAAACTTTAAAATTTTTGACAAAACTCTATCAGTAGAATTTTCCCATGA
Pcoc84	7679673A-R	GATCTCATGGGAAAATTCTACTGATAGAGTTTTGTCAAAAATTTTAAAGTTTTTAAGCC
Pcoc85	7679673C-F	GGCTTAAAAACTTTAAAATTTTTGACACAACTCTATCAGTAGAATTTTCCCATGA
Pcoc86	7679673C-R	GATCTCATGGGAAAATTCTACTGATAGAGTTGTGTCAAAAATTTTAAAGTTTTTAAGCC
Pcoc87	2242652G-F	GGCCGTGCTGCATCCAGGCCCTGGCCCGGCTGCTTCTTGTGGTCCTCAGAGCCTG
Pcoc88	2242652G-R	GATCCAGGCTCTGAGGACCACAAGAAGCAGCCGGGCCAGGGCCTGGATGCAGCACGGCC
Pcoc89	2242652A-F	GGCCGTGCTGCATCCAGGCCCTGGCCCAGCTGCTTCTTGTGGTCCTCAGAGCCTG
Pcoc90	2242652A-R	GATCCAGGCTCTGAGGACCACAAGAAGCAGCTGGGCCAGGGCCTGGATGCAGCACGGCC
Pcoc91	12653946C-F	GTGCTTATGTGTAGCTGGTTAGCTTTGCCATATTCTGTTCATCACAAGCAAGTTG
Pcoc92	12653946C-R	GATCCAACTTGCTTGTGATGAACAGAATATGGCAAAGCTAACCAGCTACACATAAGCAC
Pcoc93	12653946T-F	GTGCTTATGTGTAGCTGGTTAGCTTTGTCATATTCTGTTCATCACAAGCAAGTTG
Pcoc94	12653946T-R	GATCCAACTTGCTTGTGATGAACAGAATATGACAAAGCTAACCAGCTACACATAAGCAC
Pcoc95	2121875C-F:	CTGATGCTGTAATGCTATTTAAAAATACATTTAGTAGGAAACTCAAAACCTTCTT
Pcoc96	2121875C-R	GATCAAGAAGGTTTTGAGTTTCCTACTAAATGTATTTTTAAATAGCATTACAGCATCAG
Pcoc97	2121875A-F	CTGATGCTGTAATGCTATTTAAAAATAAATTTAGTAGGAAACTCAAAACCTTCTT
Pcoc98	2121875A-R	GATCAAGAAGGTTTTGAGTTTCCTACTAAATTTATTTTTAAATAGCATTACAGCATCAG
Pcoc99	6869841C-F:	TTGTTTATGCTATCTTCAGAATATATTCGTAATATGACCACTTTCCACCACTTCC
Pcoc100	6869841C-F	GATCGGAAGTGGTGGAAAGTGGTCATATTACGAATATATTCTGAAGATAGCATAAACAA
Pcoc101	6869841T-F	TTGTTTATGCTATCTTCAGAATATATTTGTAATATGACCACTTTCCACCACTTCC
Pcoc102	6869841T-F	GATCGGAAGTGGTGGAAAGTGGTCATATTACAAATATATTCTGAAGATAGCATAAACAA
Pcoc103	130067T-F	ACATTCCTGCACCCTCACCTGCATGGTTTCCAGAAGCTTCTGTCGCTCCAGTTCC
Pcoc104	130067T-R	GATCGGAACTGGAGCGACAGAAGCTTCTGGAAACCATGCAGGTGAGGGTGCAGGAATGT
Pcoc105	130067G-F	ACATTCCTGCACCCTCACCTGCATGGTGTCCAGAAGCTTCTGTCGCTCCAGTTCC
Pcoc106	130067G-R	GATCGGAACTGGAGCGACAGAAGCTTCTGGACACCATGCAGGTGAGGGTGCAGGAATGT
Pcoc107	3096702G-F	GCCAGGACTTATTTTTCTCCTTCTGGCGAATGGGCAAGATGCTGGCCGGTTTTGG
Pcoc108	3096702G-R	GATCCCAAAACCGGCCAGCATCTTGCCCATTCGCCAGAAGGAGAAAAATAAGTCCTGGC
Pcoc109	3096702A-F:	GCCAGGACTTATTTTTCTCCTTCTGGCAAATGGGCAAGATGCTGGCCGGTTTTGG
Pcoc110	3096702A-R:	GATCCCAAAACCGGCCAGCATCTTGCCCATTTGCCAGAAGGAGAAAAATAAGTCCTGGC
Pcoc111	2273669A-F:	TTGCAGTATCTGTCGATTGGGGGAGCCAACTCTGGGAGTGGTGGGTATTGGGGAA
Pcoc112	2273669A-R:	GATCTTCCCCAATACCCACCACTCCCAGAGTTGGCTCCCCCAATCGACAGATACTGCAA
Pcoc113	2273669G-F:	TTGCAGTATCTGTCGATTGGGGGAGCCGACTCTGGGAGTGGTGGGTATTGGGGAA
Pcoc114	2273669G-R:	GATCTTCCCCAATACCCACCACTCCCAGAGTCGGCTCCCCCAATCGACAGATACTGCAA
Pcoc115	339331C-F	TTTGCATGAACTCTCTCTCCCCAGTTTCATGAGGTTTATCTTTAGTGACTAGGAG
Pcoc116	339331C-R；	GATCCTCCTAGTCACTAAAGATAAACCTCATGAAACTGGGGAGAGAGAGTTCATGCAAA
Pcoc117	339331T-F；	TTTGCATGAACTCTCTCTCCCCAGTTTTATGAGGTTTATCTTTAGTGACTAGGAG
Pcoc118	339331T-R；	GATCCTCCTAGTCACTAAAGATAAACCTCATAAAACTGGGGAGAGAGAGTTCATGCAAA
Pcoc119	1933488A-F	GGCTTTTCTCCAAATGGTGAAACACACATATCTTCCAGGGAAACCACTGTCTTCC
Pcoc120	1933488A-R	GATCGGAAGACAGTGGTTTCCCTGGAAGATATGTGTGTTTCACCATTTGGAGAAAAGCC
Pcoc121	1933488G-F	GGCTTTTCTCCAAATGGTGAAACACACGTATCTTCCAGGGAAACCACTGTCTTCC
Pcoc122	1933488G-R	GATCGGAAGACAGTGGTTTCCCTGGAAGATACGTGTGTTTCACCATTTGGAGAAAAGCC
Pcoc123	651164A-F:	CAAAGAACTCTCAATGGTGGAGTGAACATAGCCCTTCATTTCAGTGTTGGAAGCA
Pcoc124	651164A-R	GATCTGCTTCCAACACTGAAATGAAGGGCTATGTTCACTCCACCATTGAGAGTTCTTTG
Pcoc125	651164G-F	CAAAGAACTCTCAATGGTGGAGTGAACGTAGCCCTTCATTTCAGTGTTGGAAGCA
Pcoc126	651164G-R:	GATCTGCTTCCAACACTGAAATGAAGGGCTACGTTCACTCCACCATTGAGAGTTCTTTG
Pcoc127	9364554C-F	CACTATGATTAGTCCATCCTTGTCACTCTTTGAGTGAACACATTTGAGCTGTGTG
Pcoc128	9364554C-R	GATCCACACAGCTCAAATGTGTTCACTCAAAGAGTGACAAGGATGGACTAATCATAGTG
Pcoc129	9364554T-F	CACTATGATTAGTCCATCCTTGTCACTTTTTGAGTGAACACATTTGAGCTGTGTG
Pcoc130	9364554T-R	GATCCACACAGCTCAAATGTGTTCACTCAAAAAGTGACAAGGATGGACTAATCATAGTG
Pcoc131	12155172A-F	GTGTTTGGCCTGTTCCTCTCTGCCCACAACATTCCTCCACACCCCTCGCACTTTA
Pcoc132	12155172A-R	GATCTAAAGTGCGAGGGGTGTGGAGGAATGTTGTGGGCAGAGAGGAACAGGCCAAACAC
Pcoc133	12155172G-F	GTGTTTGGCCTGTTCCTCTCTGCCCACGACATTCCTCCACACCCCTCGCACTTTA
Pcoc134	12155172G-R	GATCTAAAGTGCGAGGGGTGTGGAGGAATGTCGTGGGCAGAGAGGAACAGGCCAAACAC
Pcoc135	6465657C-F	AGTAATATCTGGTACGTATTGGCTTACCGTTTTATTAGTCATTTCTTTGGCAAAG
Pcoc136	6465657C-R	GATCCTTTGCCAAAGAAATGACTAATAAAACGGTAAGCCAATACGTACCAGATATTACT
Pcoc137	6465657T-F	AGTAATATCTGGTACGTATTGGCTTACTGTTTTATTAGTCATTTCTTTGGCAAAG
Pcoc138	6465657T-R	GATCCTTTGCCAAAGAAATGACTAATAAAACAGTAAGCCAATACGTACCAGATATTACT
Pcoc139	1512268T-F	CATGTGAAGCAAACCCTTTCTGTAGATTGTGCAAATTTAACTCAATCTGCATTGG
Pcoc140	1512268T-R	GATCCCAATGCAGATTGAGTTAAATTTGCACAATCTACAGAAAGGGTTTGCTTCACATG
Pcoc141	1512268C-F	CATGTGAAGCAAACCCTTTCTGTAGATCGTGCAAATTTAACTCAATCTGCATTGG
Pcoc142	1512268C-R	GATCCCAATGCAGATTGAGTTAAATTTGCACGATCTACAGAAAGGGTTTGCTTCACATG
Pcoc143	11135910C-F	CTCCCTTACCACCAGGGAGCCCATCTGCTGCCTATCAGGGCTACAGACTTCTGAA
Pcoc144	11135910C-R	GATCTTCAGAAGTCTGTAGCCCTGATAGGCAGCAGATGGGCTCCCTGGTGGTAAGGGAG
Pcoc145	11135910T-F	CTCCCTTACCACCAGGGAGCCCATCTGTTGCCTATCAGGGCTACAGACTTCTGAA
Pcoc146	11135910T-R	GATCTTCAGAAGTCTGTAGCCCTGATAGGCAACAGATGGGCTCCCTGGTGGTAAGGGAG
Pcoc147	1016343C-F	TCCAAGACCATGTGTTACATTTCCCTCCCATGATTACTCACAGCTTCACAGTTCT
Pcoc148	1016343C-R	GATCAGAACTGTGAAGCTGTGAGTAATCATGGGAGGGAAATGTAACACATGGTCTTGGA
Pcoc149	1016343T-F	TCCAAGACCATGTGTTACATTTCCCTCTCATGATTACTCACAGCTTCACAGTTCT
Pcoc150	1016343T-R	GATCAGAACTGTGAAGCTGTGAGTAATCATGAGAGGGAAATGTAACACATGGTCTTGGA
Pcoc151	1456315A-F	GAAGAACTGAGGTTGCTAATAAATCTAAACAACTTATAAGTAAATATTTAATTTA
Pcoc152	1456315A-R	GATCTAAATTAAATATTTACTTATAAGTTGTTTAGATTTATTAGCAACCTCAGTTCTTC
Pcoc153	1456315G-F	GAAGAACTGAGGTTGCTAATAAATCTAGACAACTTATAAGTAAATATTTAATTTA
Pcoc154	1456315G-R	GATCTAAATTAAATATTTACTTATAAGTTGTGTAGATTTATTAGCAACCTCAGTTCTTC
Pcoc155	13254738A-F	TCCTCCTCATGGCCTCCTGCAGAATGCAATTCTAAAATTAGGTTCTATTTTCCTC
Pcoc156	13254738A-R	GATCGAGGAAAATAGAACCTAATTTTAGAATTGCATTCTGCAGGAGGCCATGAGGAGGA
Pcoc157	13254738C-F	TCCTCCTCATGGCCTCCTGCAGAATGCCATTCTAAAATTAGGTTCTATTTTCCTC
Pcoc158	13254738C-R	GATCGAGGAAAATAGAACCTAATTTTAGAATGGCATTCTGCAGGAGGCCATGAGGAGGA
Pcoc159	6983561A-F	ATTGCAAACTAATAGAACATATAGCACAAAATGATTATATCAATAGAATGCTAAT
Pcoc160	6983561A-R	GATCATTAGCATTCTATTGATATAATCATTTTGTGCTATATGTTCTATTAGTTTGCAAT
Pcoc161	6983561C-F	ATTGCAAACTAATAGAACATATAGCACCAAATGATTATATCAATAGAATGCTAAT
Pcoc162	6983561C-R	GATCATTAGCATTCTATTGATATAATCATTTGGTGCTATATGTTCTATTAGTTTGCAAT
Pcoc163	16901979A-F	CAGTGTTAATGATTTAGCATTACTTATATCTGGCAAATGGTATTTTTGAGATAAC
Pcoc164	16901979A-R	GATCGTTATCTCAAAAATACCATTTGCCAGATATAAGTAATGCTAAATCATTAACACTG
Pcoc165	16901979C-F	CAGTGTTAATGATTTAGCATTACTTATCTCTGGCAAATGGTATTTTTGAGATAAC
Pcoc166	16901979C-R	GATCGTTATCTCAAAAATACCATTTGCCAGAGATAAGTAATGCTAAATCATTAACACTG
Pcoc167	10505483T-F	TGTCAGCATAGGGCCCTGGGCTTACAATGGTGCCATGAGCCTTAGAACAGAGGAA
Pcoc168	10505483T-R	GATCTTCCTCTGTTCTAAGGCTCATGGCACCATTGTAAGCCCAGGGCCCTATGCTGACA
Pcoc169	10505483C-F	TGTCAGCATAGGGCCCTGGGCTTACAACGGTGCCATGAGCCTTAGAACAGAGGAA
Pcoc170	10505483C-R	GATCTTCCTCTGTTCTAAGGCTCATGGCACCGTTGTAAGCCCAGGGCCCTATGCTGACA
Pcoc171	16902094A-F	AACGTTAAATTATGCTACTGGTGAAATAAGTCCATTTGGGTTATTGTGGAATTTT
Pcoc172	16902094A-R	GATCAAAATTCCACAATAACCCAAATGGACTTATTTCACCAGTAGCATAATTTAACGTT
Pcoc173	16902094G-F	AACGTTAAATTATGCTACTGGTGAAATGAGTCCATTTGGGTTATTGTGGAATTTT
Pcoc174	16902094G-R	GATCAAAATTCCACAATAACCCAAATGGACTCATTTCACCAGTAGCATAATTTAACGTT
Pcoc175	445114C-F	TCCGTTTATCCCCTTTATTTGTTAGCACAGATTACCTTTATTTTAGCACTTACTT
Pcoc176	445114C-R	GATCAAGTAAGTGCTAAAATAAAGGTAATCTGTGCTAACAAATAAAGGGGATAAACGGA
Pcoc177	445114T-F	TCCGTTTATCCCCTTTATTTGTTAGCATAGATTACCTTTATTTTAGCACTTACTT
Pcoc178	445114T-R	GATCAAGTAAGTGCTAAAATAAAGGTAATCTATGCTAACAAATAAAGGGGATAAACGGA
Pcoc179	6983267G-F	TCGTCCTTTGAGCTCAGCAGATGAAAGGCACTGAGAAAAGTACAAAGAATTTTTA
Pcoc180	6983267G-R	GATCTAAAAATTCTTTGTACTTTTCTCAGTGCCTTTCATCTGCTGAGCTCAAAGGACGA
Pcoc181	6983267T-F	TCGTCCTTTGAGCTCAGCAGATGAAAGTCACTGAGAAAAGTACAAAGAATTTTTA
Pcoc182	6983267T-R	GATCTAAAAATTCTTTGTACTTTTCTCAGTGACTTTCATCTGCTGAGCTCAAAGGACGA
Pcoc183	1447295A-F	GAAGTGCCATTGGGGAGGTATGTAAAAAGTGCTATGGAAAAAAAGCAACAGGAAC
Pcoc184	1447295A-R	GATCGTTCCTGTTGCTTTTTTTCCATAGCACTTTTTACATACCTCCCCAATGGCACTTC
Pcoc185	1447295C-F	GAAGTGCCATTGGGGAGGTATGTAAAACGTGCTATGGAAAAAAAGCAACAGGAAC
Pcoc186	1447295C-R	GATCGTTCCTGTTGCTTTTTTTCCATAGCACGTTTTACATACCTCCCCAATGGCACTTC
Pcoc187	4242382A-F	ACATTTTGTCCCTCTAGTTATCTTCCCACAGGCCCATCAAGAATCAGGCAGTAGG
Pcoc188	4242382A-R	GATCCCTACTGCCTGATTCTTGATGGGCCTGTGGGAAGATAACTAGAGGGACAAAATGT
Pcoc189	4242382G-F	ACATTTTGTCCCTCTAGTTATCTTCCCGCAGGCCCATCAAGAATCAGGCAGTAGG
Pcoc190	4242382G-R	GATCCCTACTGCCTGATTCTTGATGGGCCTGCGGGAAGATAACTAGAGGGACAAAATGT
Pcoc191	4242384A-F	ACAGTCCCATGCTAGAAGCTGCTTTACAAACACAGTCAGCTGCTATCTCCACAAC
Pcoc192	4242384A-R	GATCGTTGTGGAGATAGCAGCTGACTGTGTTTGTAAAGCAGCTTCTAGCATGGGACTGT
Pcoc193	4242384C-F	ACAGTCCCATGCTAGAAGCTGCTTTACCAACACAGTCAGCTGCTATCTCCACAAC
Pcoc194	4242384C-R	GATCGTTGTGGAGATAGCAGCTGACTGTGTTGGTAAAGCAGCTTCTAGCATGGGACTGT
Pcoc195	7837688G-F	AACATTTCCCACTAGAGTGGTGCATTTGGTACAATTGGGTCTATGTTGACACGTC
Pcoc196	7837688G-R	GATCGACGTGTCAACATAGACCCAATTGTACCAAATGCACCACTCTAGTGGGAAATGTT
Pcoc197	7837688T-F	AACATTTCCCACTAGAGTGGTGCATTTTGTACAATTGGGTCTATGTTGACACGTC
Pcoc198	7837688T-R	GATCGACGTGTCAACATAGACCCAATTGTACAAAATGCACCACTCTAGTGGGAAATGTT
Pcoc199	817826C-F	GCCTGATGCTACAGAGGCCCTAGTAAACGATTGTGCATCTACACTAAGTCTCAAC
Pcoc200	817826C-R	GATCGTTGAGACTTAGTGTAGATGCACAATCGTTTACTAGGGCCTCTGTAGCATCAGGC
Pcoc201	817826T-F	GCCTGATGCTACAGAGGCCCTAGTAAATGATTGTGCATCTACACTAAGTCTCAAC
Pcoc202	817826T-R	GATCGTTGAGACTTAGTGTAGATGCACAATCATTTACTAGGGCCTCTGTAGCATCAGGC
Pcoc203	3123078C-F	CACTTTTCTAAAGGAATCCTATGTCCCCGGATCTCGAGGAAGCAGCAAAGAGTCA
Pcoc204	3123078C-R	GATCTGACTCTTTGCTGCTTCCTCGAGATCCGGGGACATAGGATTCCTTTAGAAAAGTG
Pcoc205	3123078T-F	CACTTTTCTAAAGGAATCCTATGTCCCTGGATCTCGAGGAAGCAGCAAAGAGTCA
Pcoc206	3123078T-R	GATCTGACTCTTTGCTGCTTCCTCGAGATCCAGGGACATAGGATTCCTTTAGAAAAGTG
Pcoc207	10993994C-F	ACTGGAGAGGGCAACCACGCATTCGACCTCATTGGGAATGATAACAAGGTGAGAA
Pcoc208	10993994C-R	GATCTTCTCACCTTGTTATCATTCCCAATGAGGTCGAATGCGTGGTTGCCCTCTCCAGT
Pcoc209	10993994T-F	ACTGGAGAGGGCAACCACGCATTCGACTTCATTGGGAATGATAACAAGGTGAGAA
Pcoc210	10993994T-R	GATCTTCTCACCTTGTTATCATTCCCAATGAAGTCGAATGCGTGGTTGCCCTCTCCAGT
Pcoc211	3850699G-F	AAAAAATAATAAGATAAATAAATATGCGTGGGAAGCTATTCTGGGGAGAGCTGGG
Pcoc212	3850699G-R	GATCCCCAGCTCTCCCCAGAATAGCTTCCCACGCATATTTATTTATCTTATTATTTTTT
Pcoc213	3850699A-F	AAAAAATAATAAGATAAATAAATATGCATGGGAAGCTATTCTGGGGAGAGCTGGG
Pcoc214	3850699A-R	GATCCCCAGCTCTCCCCAGAATAGCTTCCCATGCATATTTATTTATCTTATTATTTTTT
Pcoc215	11199874A-F	GAGTAGGAAAACCTGGATTCTAATTCTATCTGCCACCAGCTACTTCTATGGCCTT
Pcoc216	11199874A-R	GATCAAGGCCATAGAAGTAGCTGGTGGCAGATAGAATTAGAATCCAGGTTTTCCTACTC
Pcoc217	11199874G-F	GAGTAGGAAAACCTGGATTCTAATTCTGTCTGCCACCAGCTACTTCTATGGCCTT
Pcoc218	11199874G-R	GATCAAGGCCATAGAAGTAGCTGGTGGCAGACAGAATTAGAATCCAGGTTTTCCTACTC
Pcoc219	7127900A-F	TATTGGGCCATGCGAGGAATGATGGACAGATGCAGGCTGCAGCATGGACAGGCCT
Pcoc220	7127900A-R	GATCAGGCCTGTCCATGCTGCAGCCTGCATCTGTCCATCATTCCTCGCATGGCCCAATA
Pcoc221	7127900C-F	TATTGGGCCATGCGAGGAATGATGGACCGATGCAGGCTGCAGCATGGACAGGCCT
Pcoc222	7127900C-R	GATCAGGCCTGTCCATGCTGCAGCCTGCATCGGTCCATCATTCCTCGCATGGCCCAATA
Pcoc223	7127900G-F	TATTGGGCCATGCGAGGAATGATGGACGGATGCAGGCTGCAGCATGGACAGGCCT
Pcoc224	7127900G-R	GATCAGGCCTGTCCATGCTGCAGCCTGCATCCGTCCATCATTCCTCGCATGGCCCAATA
Pcoc225	11228565A-F	AGCCAAACCTCTGAATTCCATGGAGTTATTGGGTCAAAGAGCTTGCCTAGGTCTG
Pcoc226	11228565A-R	GATCCAGACCTAGGCAAGCTCTTTGACCCAATAACTCCATGGAATTCAGAGGTTTGGCT
Pcoc227	11228565G-F	AGCCAAACCTCTGAATTCCATGGAGTTGTTGGGTCAAAGAGCTTGCCTAGGTCTG
Pcoc228	11228565G-R	GATCCAGACCTAGGCAAGCTCTTTGACCCAACAACTCCATGGAATTCAGAGGTTTGGCT
Pcoc229	7931342T-F	TACAGGATCAGGGAAGTTGCCCTGAAGTTGATAAGCAGAATGTGGAAGGATGGGC
Pcoc230	7931342T-R	GATCGCCCATCCTTCCACATTCTGCTTATCAACTTCAGGGCAACTTCCCTGATCCTGTA
Pcoc231	7931342G-F	TACAGGATCAGGGAAGTTGCCCTGAAGGTGATAAGCAGAATGTGGAAGGATGGGC
Pcoc232	7931342G-R	GATCGCCCATCCTTCCACATTCTGCTTATCACCTTCAGGGCAACTTCCCTGATCCTGTA
Pcoc233	10896449A-F	AGCAGTTTAACTTTACAGGAGCTGAAAATTTAAGAAGGGGAATGTCAAGAGATGA
Pcoc234	10896449A-R	GATCTCATCTCTTGACATTCCCCTTCTTAAATTTTCAGCTCCTGTAAAGTTAAACTGCT
Pcoc235	10896449G-F	AGCAGTTTAACTTTACAGGAGCTGAAAGTTTAAGAAGGGGAATGTCAAGAGATGA
Pcoc236	10896449G-R	GATCTCATCTCTTGACATTCCCCTTCTTAAACTTTCAGCTCCTGTAAAGTTAAACTGCT
Pcoc237	7130881A-F	GCTCCAGAACCCATACACTGATAGAGTATATTTCTGTTCAATATTTATTAAACTC
Pcoc238	7130881A-R	GATCGAGTTTAATAAATATTGAACAGAAATATACTCTATCAGTGTATGGGTTCTGGAGC
Pcoc239	7130881G-F	GCTCCAGAACCCATACACTGATAGAGTGTATTTCTGTTCAATATTTATTAAACTC
Pcoc240	7130881G-R	GATCGAGTTTAATAAATATTGAACAGAAATACACTCTATCAGTGTATGGGTTCTGGAGC
Pcoc241	11568818T-F	TTATTGGCAGGAAGCACACAATGTATTTGTCTTTCAAAGGATTTTTTTTTCTGTC
Pcoc242	11568818T-R	GATCGACAGAAAAAAAAATCCTTTGAAAGACAAATACATTGTGTGCTTCCTGCCAATAA
Pcoc243	11568818C-F	TTATTGGCAGGAAGCACACAATGTATTCGTCTTTCAAAGGATTTTTTTTTCTGTC
Pcoc244	11568818C-R	GATCGACAGAAAAAAAAATCCTTTGAAAGACGAATACATTGTGTGCTTCCTGCCAATAA
Pcoc245	10875943C-F	AGGTACCTATCAAAATGAGCCTGACCCCAGGGCAATGCCACAGCTTCCAGAGCCT
Pcoc246	10875943C-R	GATCAGGCTCTGGAAGCTGTGGCATTGCCCTGGGGTCAGGCTCATTTTGATAGGTACCT
Pcoc247	10875943T-F	AGGTACCTATCAAAATGAGCCTGACCCTAGGGCAATGCCACAGCTTCCAGAGCCT
Pcoc248	10875943T-R	GATCAGGCTCTGGAAGCTGTGGCATTGCCCTAGGGTCAGGCTCATTTTGATAGGTACCT
Pcoc249	902774G-F	CTGCTCCTCTGCTGCCTCCTAGTGGATGTCTGATGTCTCTCCGGTTTGCACAAAT
Pcoc250	902774G-R	GATCATTTGTGCAAACCGGAGAGACATCAGACATCCACTAGGAGGCAGCAGAGGAGCAG
Pcoc251	902774A-F	CTGCTCCTCTGCTGCCTCCTAGTGGATATCTGATGTCTCTCCGGTTTGCACAAAT
Pcoc252	902774A-R	GATCATTTGTGCAAACCGGAGAGACATCAGATATCCACTAGGAGGCAGCAGAGGAGCAG
Pcoc253	1270884G-F	GTAGGTAAAATGGGCCCAATAATGCCCGTCTTAGAACATATGAGATTTTGTGAGC
Pcoc254	1270884G-R	GATCGCTCACAAAATCTCATATGTTCTAAGACGGGCATTATTGGGCCCATTTTACCTAC
Pcoc255	1270884A-F	GTAGGTAAAATGGGCCCAATAATGCCCATCTTAGAACATATGAGATTTTGTGAGC
Pcoc256	1270884A-R	GATCGCTCACAAAATCTCATATGTTCTAAGATGGGCATTATTGGGCCCATTTTACCTAC
Pcoc257	9600079G-F	CAGAGGAGGTTGCACCCACTTACAATTGTTAAAGACTTATTCTGACATCTTTTTT
Pcoc258	9600079G-R	GATCAAAAAAGATGTCAGAATAAGTCTTTAACAATTGTAAGTGGGTGCAACCTCCTCTG
Pcoc259	9600079T-F	CAGAGGAGGTTGCACCCACTTACAATTTTTAAAGACTTATTCTGACATCTTTTTT
Pcoc260	9600079T-R	GATCAAAAAAGATGTCAGAATAAGTCTTTAAAAATTGTAAGTGGGTGCAACCTCCTCTG
Pcoc261	8008270C-F	GACTGAAGACATATCCTCGAGACAAAACGAACATTTCGAGGTGATGAGATGTGTA
Pcoc262	8008270C-R	GATCTACACATCTCATCACCTCGAAATGTTCGTTTTGTCTCGAGGATATGTCTTCAGTC
Pcoc263	8008270T-F	GACTGAAGACATATCCTCGAGACAAAATGAACATTTCGAGGTGATGAGATGTGTA
Pcoc264	8008270T-R	GATCTACACATCTCATCACCTCGAAATGTTCATTTTGTCTCGAGGATATGTCTTCAGTC
Pcoc265	7141529C-F	GTTCTGTGAGATTCCTATTGATGTCAGCAGCTTTTAAACGAATAAGCCATGGATT
Pcoc266	7141529C-R	GATCAATCCATGGCTTATTCGTTTAAAAGCTGCTGACATCAATAGGAATCTCACAGAAC
Pcoc267	7141529T-F	GTTCTGTGAGATTCCTATTGATGTCAGTAGCTTTTAAACGAATAAGCCATGGATT
Pcoc268	7141529T-R	GATCAATCCATGGCTTATTCGTTTAAAAGCTACTGACATCAATAGGAATCTCACAGAAC
Pcoc269	4775302A-F	ATTATCTGACTGAGGTCATACTTTCAGATTTTTCCACTGTAGTCCATGTGATATA
Pcoc270	4775302A-R	GATCTATATCACATGGACTACAGTGGAAAAATCTGAAAGTATGACCTCAGTCAGATAAT
Pcoc271	4775302G-F	ATTATCTGACTGAGGTCATACTTTCAGGTTTTTCCACTGTAGTCCATGTGATATA
Pcoc272	4775302G-R	GATCTATATCACATGGACTACAGTGGAAAAACCTGAAAGTATGACCTCAGTCAGATAAT
Pcoc273	684232T-F	TGGGGAGACGTTTACTGAGGTTGAATATCCGGGATCTAAGTCCTGAATAGTCCAC
Pcoc274	684232T-R	GATCGTGGACTATTCAGGACTTAGATCCCGGATATTCAACCTCAGTAAACGTCTCCCCA
Pcoc275	684232C-F	TGGGGAGACGTTTACTGAGGTTGAATACCCGGGATCTAAGTCCTGAATAGTCCAC
Pcoc276	684232C-R	GATCGTGGACTATTCAGGACTTAGATCCCGGGTATTCAACCTCAGTAAACGTCTCCCCA
Pcoc277	4430796A-F	GAATACAGAGAGGCAGCACAGACTGGAAATGCTGCATAAAGCTTAAATTGGGCAG
Pcoc278	4430796A-R	GATCCTGCCCAATTTAAGCTTTATGCAGCATTTCCAGTCTGTGCTGCCTCTCTGTATTC
Pcoc279	4430796G-F	GAATACAGAGAGGCAGCACAGACTGGAGATGCTGCATAAAGCTTAAATTGGGCAG
Pcoc280	4430796G-R	GATCCTGCCCAATTTAAGCTTTATGCAGCATCTCCAGTCTGTGCTGCCTCTCTGTATTC
Pcoc281	7501939C-F	CGGTGTAGAGGCTGAAATAGATACAGCATTGCAACATAATAAGCAATTTTATTT
Pcoc282	7501939C-R	GATCAAATAAAATTGCTTATTATGTTGCAATGCTGTATCTATTTCAGCCTCTACACCGT
Pcoc283	7501939T-F	ACGGTGTAGAGGCTGAAATAGATACAGTATTGCAACATAATAAGCAATTTTATTT
Pcoc284	7501939T-R	GATCAAATAAAATTGCTTATTATGTTGCAATACTGTATCTATTTCAGCCTCTACACCGT
Pcoc285	11650494A-F	TGCCTAATTTTAAAAACAATGGGAAACAGTGTCCCCAGGTAATTGTCCTACACAT
Pcoc286	11650494A-R	GATCATGTGTAGGACAATTACCTGGGGACACTGTTTCCCATTGTTTTTAAAATTAGGCA
Pcoc287	11650494G-F	TGCCTAATTTTAAAAACAATGGGAAACGGTGTCCCCAGGTAATTGTCCTACACAT
Pcoc288	11650494G-R	GATCATGTGTAGGACAATTACCTGGGGACACCGTTTCCCATTGTTTTTAAAATTAGGCA
Pcoc289	7210100A-F	AATTAGTAGAATAAATGCTATTCTTCAAGTGTATGGAACAGGTTCTATAGGCAAG
Pcoc290	7210100A-R	GATCCTTGCCTATAGAACCTGTTCCATACACTTGAAGAATAGCATTTATTCTACTAATT
Pcoc291	7210100G-F	AATTAGTAGAATAAATGCTATTCTTCAGGTGTATGGAACAGGTTCTATAGGCAAG
Pcoc292	7210100G-R	GATCCTTGCCTATAGAACCTGTTCCATACACCTGAAGAATAGCATTTATTCTACTAATT
Pcoc293	1859962G-F	GCAGACTTTTCCAAATCCCTGCCCGTGGGATGAACACTTTAAAGGTCCCAAGATT
Pcoc294	1859962G-R	GATCAATCTTGGGACCTTTAAAGTGTTCATCCCACGGGCAGGGATTTGGAAAAGTCTGC
Pcoc295	1859962T-F	GCAGACTTTTCCAAATCCCTGCCCGTGTGATGAACACTTTAAAGGTCCCAAGATT
Pcoc296	1859962T-R	GATCAATCTTGGGACCTTTAAAGTGTTCATCACACGGGCAGGGATTTGGAAAAGTCTGC
Pcoc297	7241993C-F	TATAAAGGTAACATTTTTCTTAAATGCCGAAAGCAAACTCTTGAAGTCCCATCAG
Pcoc298	7241993C-R	GATCCTGATGGGACTTCAAGAGTTTGCTTTCGGCATTTAAGAAAAATGTTACCTTTATA
Pcoc299	7241993T-F	TATAAAGGTAACATTTTTCTTAAATGCTGAAAGCAAACTCTTGAAGTCCCATCAG
Pcoc300	7241993T-R	GATCCTGATGGGACTTCAAGAGTTTGCTTTCAGCATTTAAGAAAAATGTTACCTTTATA
Pcoc301	8102476C-F	GAACTGCAGGCAGAGGCAATGTGGCCACGGGTCATGGAGGGGCCGGTAGGTGGGT
Pcoc302	8102476C-R	GATCACCCACCTACCGGCCCCTCCATGACCCGTGGCCACATTGCCTCTGCCTGCAGTTC
Pcoc303	8102476T-F	GAACTGCAGGCAGAGGCAATGTGGCCATGGGTCATGGAGGGGCCGGTAGGTGGGT
Pcoc304	8102476T-R	GATCACCCACCTACCGGCCCCTCCATGACCCATGGCCACATTGCCTCTGCCTGCAGTTC
Pcoc305	11672691A-F	AGTAAATGAGCTCACAAAAAGTGTAATAAGTGTTCTGTCGGTTTCACGTAAAGAT
Pcoc306	11672691A-R	GATCATCTTTACGTGAAACCGACAGAACACTTATTACACTTTTTGTGAGCTCATTTACT
Pcoc307	11672691G-F	AGTAAATGAGCTCACAAAAAGTGTAATGAGTGTTCTGTCGGTTTCACGTAAAGAT
Pcoc308	11672691G-R	GATCATCTTTACGTGAAACCGACAGAACACTCATTACACTTTTTGTGAGCTCATTTACT
Pcoc309	2735839A-F	CTAGGGATCTGGTTCTGTCTTGTGGCCAAGTGGACCATGGGGCTATCCCAAGAAG
Pcoc310	2735839A-R	GATCCTTCTTGGGATAGCCCCATGGTCCACTTGGCCACAAGACAGAACCAGATCCCTAG
Pcoc311	2735839G-F	CTAGGGATCTGGTTCTGTCTTGTGGCCGAGTGGACCATGGGGCTATCCCAAGAAG
Pcoc312	2735839G-R	GATCCTTCTTGGGATAGCCCCATGGTCCACTCGGCCACAAGACAGAACCAGATCCCTAG
Pcoc313	103294C-F	GGGATCACCATATCTATTCCCAAGGTTCCACCACTCTGAGAGATGCATTGTCCTC
Pcoc314	103294C-R	GATCGAGGACAATGCATCTCTCAGAGTGGTGGAACCTTGGGAATAGATATGGTGATCCC
Pcoc315	103294T-F	GGGATCACCATATCTATTCCCAAGGTTTCACCACTCTGAGAGATGCATTGTCCTC
Pcoc316	103294T-R	GATCGAGGACAATGCATCTCTCAGAGTGGTGAAACCTTGGGAATAGATATGGTGATCCC
Pcoc317	2427345C-F	TGGAGTTGTGATTGCTTTTTAGTTCCACGCGTTTCCCCGGTCAACAGAGGCTGAG
Pcoc318	2427345C-R	GATCCTCAGCCTCTGTTGACCGGGGAAACGCGTGGAACTAAAAAGCAATCACAACTCCA
Pcoc319	2427345T-F	TGGAGTTGTGATTGCTTTTTAGTTCCATGCGTTTCCCCGGTCAACAGAGGCTGAG
Pcoc320	2427345T-R	GATCCTCAGCCTCTGTTGACCGGGGAAACGCATGGAACTAAAAAGCAATCACAACTCCA
Pcoc321	6062509G-F	CTGCCACACTGTGACTCCAGCAGAGGCGATGGGACACACGGGGCATATTCTGGAG
Pcoc322	6062509G-R	GATCCTCCAGAATATGCCCCGTGTGTCCCATCGCCTCTGCTGGAGTCACAGTGTGGCAG
Pcoc323	6062509T-F	CTGCCACACTGTGACTCCAGCAGAGGCTATGGGACACACGGGGCATATTCTGGAG
Pcoc324	6062509T-R	GATCCTCCAGAATATGCCCCGTGTGTCCCATAGCCTCTGCTGGAGTCACAGTGTGGCAG
Pcoc325	5759167G-F	ACGTGACAGGGAGCCTTTCCCTTTGTGGTTGCTAAAGCAGAGAGGGAGGATAGCA
Pcoc326	5759167G-R	GATCTGCTATCCTCCCTCTCTGCTTTAGCAACCACAAAGGGAAAGGCTCCCTGTCACGT
Pcoc327	5759167T-F	ACGTGACAGGGAGCCTTTCCCTTTGTGTTTGCTAAAGCAGAGAGGGAGGATAGCA
Pcoc328	5759167T-R	GATCTGCTATCCTCCCTCTCTGCTTTAGCAAACACAAAGGGAAAGGCTCCCTGTCACGT
Pcoc329	2405942A-F	GGTGGCAGTTGTAGTTTATTCATTTTTATTGCTGTGAACCTCAGTTTGTTTGGTT
Pcoc330	2405942A-R	GATCAACCAAACAAACTGAGGTTCACAGCAATAAAAATGAATAAACTACAACTGCCACC
Pcoc331	2405942G-F	GGTGGCAGTTGTAGTTTATTCATTTTTGTTGCTGTGAACCTCAGTTTGTTTGGTT
Pcoc332	2405942G-R	GATCAACCAAACAAACTGAGGTTCACAGCAACAAAAATGAATAAACTACAACTGCCACC
Pcoc333	1327301C-F	AGGGAGGTAAGGTAACTTGGCTGAGATCACATGGATAGTAAATGGTTGAGCCAGT
Pcoc334	1327301C-R	GATCACTGGCTCAACCATTTACTATCCATGTGATCTCAGCCAAGTTACCTTACCTCCCT
Pcoc335	1327301T-F	AGGGAGGTAAGGTAACTTGGCTGAGATTACATGGATAGTAAATGGTTGAGCCAGT
Pcoc336	1327301T-R	GATCACTGGCTCAACCATTTACTATCCATGTAATCTCAGCCAAGTTACCTTACCTCCCT
Pcoc337	5945572A-F	GAGCTATTTCTGATTTGCTCAACCCACATACCCTGAGGTAGCAGAATTCTTGGCC
Pcoc338	5945572A-R	GATCGGCCAAGAATTCTGCTACCTCAGGGTATGTGGGTTGAGCAAATCAGAAATAGCTC
Pcoc339	5945572G-F	GAGCTATTTCTGATTTGCTCAACCCACGTACCCTGAGGTAGCAGAATTCTTGGCC
Pcoc340	5945572G-R	GATCGGCCAAGAATTCTGCTACCTCAGGGTACGTGGGTTGAGCAAATCAGAAATAGCTC
Pcoc341	5945619C-F	ACACTTTGATTTTTAAAAGACTCCCGCCGTGAGACTCCCGCAAGGTCACTTGCTG
Pcoc342	5945619C-R	GATCCAGCAAGTGACCTTGCGGGAGTCTCACGGCGGGAGTCTTTTAAAAATCAAAGTGT
Pcoc343	5945619T-F	ACACTTTGATTTTTAAAAGACTCCCGCTGTGAGACTCCCGCAAGGTCACTTGCTG
Pcoc344	5945619T-R	GATCCAGCAAGTGACCTTGCGGGAGTCTCACAGCGGGAGTCTTTTAAAAATCAAAGTGT
Pcoc345	5919432C-F	CAGCTGTGAAGAGTCTTAGTGTAGGAACTAGGAGATGATACAACTGTTGTATGAA
Pcoc346	5919432C-R	GATCTTCATACAACAGTTGTATCATCTCCTAGTTCCTACACTAAGACTCTTCACAGCTG
Pcoc347	5919432T-F	CAGCTGTGAAGAGTCTTAGTGTAGGAATTAGGAGATGATACAACTGTTGTATGAA
Pcoc348	5919432T-R	GATCTTCATACAACAGTTGTATCATCTCCTAATTCCTACACTAAGACTCTTCACAGCTG
Pcoc349	35148638A-F	TGGCTAACAGGCAAAAACTTCAGTCTTAGTCCATTTTCTATTACTGCAGCAGAAT
Pcoc350	35148638A-R	GATCATTCTGCTGCAGTAATAGAAAATGGACTAAGACTGAAGTTTTTGCCTGTTAGCCA
Pcoc351	35148638C-F	TGGCTAACAGGCAAAAACTTCAGTCTTCGTCCATTTTCTATTACTGCAGCAGAAT
Pcoc352	35148638C-R	GATCATTCTGCTGCAGTAATAGAAAATGGACGAAGACTGAAGTTTTTGCCTGTTAGCCA
Pcoc353	78943174C-F	TATCCTTTAAGGGCTTCGTCCATACAACGAGACCTACTTGTTCAGAAGTCCTCAG
Pcoc354	78943174C-R	GATCCTGAGGACTTCTGAACAAGTAGGTCTCGTTGTATGGACGAAGCCCTTAAAGGATA
Pcoc355	78943174T-F	TATCCTTTAAGGGCTTCGTCCATACAATGAGACCTACTTGTTCAGAAGTCCTCAG
Pcoc356	78943174T-R	GATCCTGAGGACTTCTGAACAAGTAGGTCTCATTGTATGGACGAAGCCCTTAAAGGATA
Pcoc357	17599629A-F	GTCACACTAAACAGTTAACGATCCTGAACAATTCTCTTTATTTCAGGAAGAAATA
Pcoc358	17599629A-R	GATCTATTTCTTCCTGAAATAAAGAGAATTGTTCAGGATCGTTAACTGTTTAGTGTGAC
Pcoc359	17599629G-F	GTCACACTAAACAGTTAACGATCCTGAGCAATTCTCTTTATTTCAGGAAGAAATA
Pcoc360	17599629C-R	GATCTATTTCTTCCTGAAATAAAGAGAATTGCTCAGGATCGTTAACTGTTTAGTGTGAC
Pcoc361	9287719C-F	ACTAAGGAAACCAAAGTTGGTTCTCTTCTTTCTTTTTTTGAGACGCAGGTCTTGC
Pcoc362	9287719C-R	GATCGCAAGACCTGCGTCTCAAAAAAAGAAAGAAGAGAACCAACTTTGGTTTCCTTAGT
Pcoc363	9287719T-F	ACTAAGGAAACCAAAGTTGGTTCTCTTTTTTCTTTTTTTGAGACGCAGGTCTTGC
Pcoc364	9287719T-R	GATCGCAAGACCTGCGTCTCAAAAAAAGAAAAAAGAGAACCAACTTTGGTTTCCTTAGT
Pcoc365	10009409C-F	TTCCTCTCACCTAAATTATTTTTGCCACCATGTCCCATGGTTTCTATCTTCTAAA
Pcoc366	10009409C-R	GATCTTTAGAAGATAGAAACCATGGGACATGGTGGCAAAAATAATTTAGGTGAGAGGAA
Pcoc367	10009409T-F	TTCCTCTCACCTAAATTATTTTTGCCATCATGTCCCATGGTTTCTATCTTCTAAA
Pcoc368	10009409T-R	GATCTTTAGAAGATAGAAACCATGGGACATGATGGCAAAAATAATTTAGGTGAGAGGAA
Pcoc369	4713266C-F	TGTCATGTCCAAGTCACTCAAGCCTCACAGCCAGAGACTATGGGAGACAGACAGC
Pcoc370	4713266C-R	GATCGCTGTCTGTCTCCCATAGTCTCTGGCTGTGAGGCTTGAGTGACTTGGACATGACA
Pcoc371	4713266T-F	TGTCATGTCCAAGTCACTCAAGCCTCATAGCCAGAGACTATGGGAGACAGACAGC
Pcoc372	4713266T-R	GATCGCTGTCTGTCTCCCATAGTCTCTGGCTATGAGGCTTGAGTGACTTGGACATGACA
Pcoc373	115306967C-F	ATTTTCTACCATCTTTCTTATCAGGAGCCTCTAGTGATTCCTTCTCCACACTTCT
Pcoc374	115306967C-R	GATCAGAAGTGTGGAGAAGGAATCACTAGAGGCTCCTGATAAGAAAGATGGTAGAAAAT
Pcoc375	115306967G-F	ATTTTCTACCATCTTTCTTATCAGGAGGCTCTAGTGATTCCTTCTCCACACTTCT
Pcoc376	115306967G-R	GATCAGAAGTGTGGAGAAGGAATCACTAGAGCCTCCTGATAAGAAAGATGGTAGAAAAT
Pcoc377	115457135A-F	AGACATGGGAGTCCACATACTGAAATGAGAGTCATCACCTTCAGACCTCTTTCCC
Pcoc378	115457135A-R	GATCGGGAAAGAGGTCTGAAGGTGATGACTCTCATTTCAGTATGTGGACTCCCATGTCT
Pcoc379	115457135G-F	AGACATGGGAGTCCACATACTGAAATGGGAGTCATCACCTTCAGACCTCTTTCCC
Pcoc380	115457135G-R	GATCGGGAAAGAGGTCTGAAGGTGATGACTCCCATTTCAGTATGTGGACTCCCATGTCT
Pcoc381	56232506A-F	AAATTCCTTGAAATGAATGATAATAGTAACACAAGTTATCAAAACCTCTGGGATA
Pcoc382	56232506A-R	GATCTATCCCAGAGGTTTTGATAACTTGTGTTACTATTATCATTCATTTCAAGGAATTT
Pcoc383	56232506G-F	AAATTCCTTGAAATGAATGATAATAGTGACACAAGTTATCAAAACCTCTGGGATA
Pcoc384	56232506G-R	GATCTATCCCAGAGGTTTTGATAACTTGTGTCACTATTATCATTCATTTCAAGGAATTT
Pcoc385	1983891C-F	CCACACGCTGGTCCCATTCTCCTCGTACTCTCTGTGGCTCTCCAAGCTCCTCTGC
Pcoc386	1983891C-R	GATCGCAGAGGAGCTTGGAGAGCCACAGAGAGTACGAGGAGAATGGGACCAGCGTGTGG
Pcoc387	1983891T-F	CCACACGCTGGTCCCATTCTCCTCGTATTCTCTGTGGCTCTCCAAGCTCCTCTGC
Pcoc388	1983891T-R	GATCGCAGAGGAGCTTGGAGAGCCACAGAGAATACGAGGAGAATGGGACCAGCGTGTGG
Pcoc389	17694493C-F	TTGGATGGTGAGAGCAGTCACACTGTTCTGGGAATATGTTAGCCAAGTTTACTAT
Pcoc390	17694493C-R	GATCATAGTAAACTTGGCTAACATATTCCCAGAACAGTGTGACTGCTCTCACCATCCAA
Pcoc391	17694493G-F	TTGGATGGTGAGAGCAGTCACACTGTTGTGGGAATATGTTAGCCAAGTTTACTAT
Pcoc392	17694493G-R	GATCATAGTAAACTTGGCTAACATATTCCCACAACAGTGTGACTGCTCTCACCATCCAA
Pcoc393	76934034C-F	TGATCTATAGAACCAAGACAATCCCAACTGAAACCACAAGTTGTTTTCTTTTTTA
Pcoc394	76934034C-R	GATCTAAAAAAGAAAACAACTTGTGGTTTCAGTTGGGATTGTCTTGGTTCTATAGATCA
Pcoc395	76934034T-F	TGATCTATAGAACCAAGACAATCCCAATTGAAACCACAAGTTGTTTTCTTTTTTA
Pcoc396	76934034T-R	GATCTAAAAAAGAAAACAACTTGTGGTTTCAATTGGGATTGTCTTGGTTCTATAGATCA
Pcoc397	11214775A-F	TCTGTTATAATTTTTTTTCTAGATTAGATAGAGTAACTTTGTTGAGATACTTATT
Pcoc398	11214775A-R	GATCAATAAGTATCTCAACAAAGTTACTCTATCTAATCTAGAAAAAAAATTATAACAGA
Pcoc399	11214775G-F	TCTGTTATAATTTTTTTTCTAGATTAGGTAGAGTAACTTTGTTGAGATACTTATT
Pcoc400	11214775G-R	GATCAATAAGTATCTCAACAAAGTTACTCTACCTAATCTAGAAAAAAAATTATAACAGA
Pcoc401	80130819A-F	ATATATAGTATCTATATTTTAATGTACATGTGTATGTATTTTGGCAGGGACCAAA
Pcoc402	80130819A-R	GATCTTTGGTCCCTGCCAAAATACATACACATGTACATTAAAATATAGATACTATATAT
Pcoc403	80130819C-F	ATATATAGTATCTATATTTTAATGTACCTGTGTATGTATTTTGGCAGGGACCAAA
Pcoc404	80130819C-R	GATCTTTGGTCCCTGCCAAAATACATACACAGGTACATTAAAATATAGATACTATATAT
Pcoc405	8014671A-F	TCTCTTCTTCAGCCTCTGTGAATCAATATGAATCAATGGAATCAATATGGGTCCA
Pcoc406	8014671A-R	GATCTGGACCCATATTGATTCCATTGATTCATATTGATTCACAGAGGCTGAAGAAGAGA
Pcoc407	8014671G-F	TCTCTTCTTCAGCCTCTGTGAATCAATGTGAATCAATGGAATCAATATGGGTCCA
Pcoc408	8014671G-R	GATCTGGACCCATATTGATTCCATTGATTCACATTGATTCACAGAGGCTGAAGAAGAGA
Pcoc409	2807031T-F	GACCCTTCGGCCTCTGAGGCCACGGGCTATGCTTTCCCACGCTCCGGACAGCCAC
Pcoc410	2807031T-R	GATCGTGGCTGTCCGGAGCGTGGGAAAGCATAGCCCGTGGCCTCAGAGGCCGAAGGGTC
Pcoc411	2807031C-F	GACCCTTCGGCCTCTGAGGCCACGGGCCATGCTTTCCCACGCTCCGGACAGCCAC
Pcoc412	2807031C-R	GATCGTGGCTGTCCGGAGCGTGGGAAAGCATGGCCCGTGGCCTCAGAGGCCGAAGGGTC
Pcoc413	2055109T-F	CCTAATTGACCACTCTGCTTAAATGTGTAGAATTTATCTCAAGTTTAATTGTTCT
Pcoc414	2055109T-R	GATCAGAACAATTAAACTTGAGATAAATTCTACACATTTAAGCAGAGTGGTCAATTAGG
Pcoc415	2055109C-F	CCTAATTGACCACTCTGCTTAAATGTGCAGAATTTATCTCAAGTTTAATTGTTCT
Pcoc416	2055109C-R	GATCAGAACAATTAAACTTGAGATAAATTCTGCACATTTAAGCAGAGTGGTCAATTAGG
Pcoc417	6625711A-F	CAAATCCCTTTTTTTTTTTTTTTTTTGAGACAAAGTCTTGCTCTGTCGCCCAGGC
Pcoc418	6625711A-R	GATCGCCTGGGCGACAGAGCAAGACTTTGTCTCAAAAAAAAAAAAAAAAAAGGGATTTG
Pcoc419	6625711T-F	CAAATCCCTTTTTTTTTTTTTTTTTTGTGACAAAGTCTTGCTCTGTCGCCCAGGC
Pcoc420	6625711T-R	GATCGCCTGGGCGACAGAGCAAGACTTTGTCACAAAAAAAAAAAAAAAAAAGGGATTTG
Pcoc421	4844289A-F	GATTACAGGCATAAGCCACCGTGCCCGACTTTTATAAACAGAAATGAGATATTTA
Pcoc422	4844289A-R	GATCTAAATATCTCATTTCTGTTTATAAAAGTCGGGCACGGTGGCTTATGCCTGTAATC
Pcoc423	4844289G-F	GATTACAGGCATAAGCCACCGTGCCCGGCTTTTATAAACAGAAATGAGATATTTA
Pcoc424	4844289G-R	GATCTAAATATCTCATTTCTGTTTATAAAAGCCGGGCACGGTGGCTTATGCCTGTAATC
Pcoc425	1775148C-F	TTCCTTTTTTTTTTTGAGATGGAGTCTCGTTCTGTTGCCAGGCTGGAGTGCAGTG
Pcoc426	1775148C-R	GATCCACTGCACTCCAGCCTGGCAACAGAACGAGACTCCATCTCAAAAAAAAAAAGGAA
Pcoc427	1775148T-F	TTCCTTTTTTTTTTTGAGATGGAGTCTTGTTCTGTTGCCAGGCTGGAGTGCAGTG
Pcoc428	1775148T-R	GATCCACTGCACTCCAGCCTGGCAACAGAACAAGACTCCATCTCAAAAAAAAAAAGGAA
Pcoc429	9443189A-F	GCTGGTCTCAAACTCCTGACTTAGGTGATCTGCCCGCCTTGGCTTCCCAAAGTGC
Pcoc430	9443189A-R	GATCGCACTTTGGGAAGCCAAGGCGGGCAGATCACCTAAGTCAGGAGTTTGAGACCAGC
Pcoc431	9443189G-F	GCTGGTCTCAAACTCCTGACTTAGGTGGTCTGCCCGCCTTGGCTTCCCAAAGTGC
Pcoc432	9443189G-R	GATCGCACTTTGGGAAGCCAAGGCGGGCAGACCACCTAAGTCAGGAGTTTGAGACCAGC
Pcoc433	7153648C-F	TGGAATCTCTGTCCCGCCCCCCCGCCCCCATCTCATTCACTAACCCTTGACCTTT
Pcoc434	7153648C-R	GATCAAAGGTCAAGGGTTAGTGAATGAGATGGGGGCGGGGGGGCGGGACAGAGATTCCA
Pcoc435	7153648G-F	TGGAATCTCTGTCCCGCCCCCCCGCCCGCATCTCATTCACTAACCCTTGACCTTT
Pcoc436	7153648G-R	GATCAAAGGTCAAGGGTTAGTGAATGAGATGCGGGCGGGGGGGCGGGACAGAGATTCCA
Pcoc437	12051443A-F	TTTTTCTCTTTTTTGAGAAGGAGTCTCACTGTGTCGCCCAGGCTGGAGTGCAGTG
Pcoc438	12051443A-R	GATCCACTGCACTCCAGCCTGGGCGACACAGTGAGACTCCTTCTCAAAAAAGAGAAAAA
Pcoc439	12051443G-F	TTTTTCTCTTTTTTGAGAAGGAGTCTCGCTGTGTCGCCCAGGCTGGAGTGCAGTG
Pcoc440	12051443G-R	GATCCACTGCACTCCAGCCTGGGCGACACAGCGAGACTCCTTCTCAAAAAAGAGAAAAA
Pcoc441	12480328C-F	GAGTTGATTTCCGCATACGGTGAGAGACAGGGGTCTAGTTTCATTCTTCTGCACT
Pcoc442	12480328C-R	GATCAGTGCAGAAGAATGAAACTAGACCCCTGTCTCTCACCGTATGCGGAAATCAACTC
Pcoc443	12480328T-F	GAGTTGATTTCCGCATACGGTGAGAGATAGGGGTCTAGTTTCATTCTTCTGCACT
Pcoc444	12480328T-R	GATCAGTGCAGAAGAATGAAACTAGACCCCTATCTCTCACCGTATGCGGAAATCAACTC
Pcoc445	1041449A-F	GGGCGCCAGCAGGGAAGTGCTACTTGGAGCCGGGGCCCAGAGGAGCTCCCCAGGG
Pcoc446	1041449A-R	GATCCCCTGGGGAGCTCCTCTGGGCCCCGGCTCCAAGTAGCACTTCCCTGCTGGCGCCC
Pcoc447	1041449G-F	GGGCGCCAGCAGGGAAGTGCTACTTGGGGCCGGGGCCCAGAGGAGCTCCCCAGGG
Pcoc448	1041449G-R	GATCCCCTGGGGAGCTCCTCTGGGCCCCGGCCCCAAGTAGCACTTCCCTGCTGGCGCCC
Pcoc449	2238776A-F	CCCCAGGGCCTGGGGGTGCAGCTGGACAATCCTGCAGTAGCCCCGCTCCCTGTTT
Pcoc450	2238776A-R	GATCAAACAGGGAGCGGGGCTACTGCAGGATTGTCCAGCTGCACCCCCAGGCCCTGGGG
Pcoc451	2238776G-F	CCCCAGGGCCTGGGGGTGCAGCTGGACGATCCTGCAGTAGCCCCGCTCCCTGTTT
Pcoc452	2238776G-R	GATCAAACAGGGAGCGGGGCTACTGCAGGATCGTCCAGCTGCACCCCCAGGCCCTGGGG
Pcoc453	2238776T-F	CCCCAGGGCCTGGGGGTGCAGCTGGACTATCCTGCAGTAGCCCCGCTCCCTGTTT
Pcoc454	2238776T-R	GATCAAACAGGGAGCGGGGCTACTGCAGGATAGTCCAGCTGCACCCCCAGGCCCTGGGG
Pcoc455	636291A-F	TTTTCTTCCTGCGTAGCGATAGCAGGCATAGGGCTGTACTGCCAAGGCTTTGTTT
Pcoc456	636291A-R	GATCAAACAAAGCCTTGGCAGTACAGCCCTATGCCTGCTATCGCTACGCAGGAAGAAAA
Pcoc457	636291G-F	TTTTCTTCCTGCGTAGCGATAGCAGGCGTAGGGCTGTACTGCCAAGGCTTTGTTT
Pcoc458	636291G-R	GATCAAACAAAGCCTTGGCAGTACAGCCCTACGCCTGCTATCGCTACGCAGGAAGAAAA
Pcoc459	13385191A-F	GACATGCTGAGGTCCCTATGTCAGGAAAACCACTCTGGCCACAACGAGAAGAAGG
Pcoc460	13385191A-R	GATCCCTTCTTCTCGTTGTGGCCAGAGTGGTTTTCCTGACATAGGGACCTCAGCATGTC
Pcoc461	13385191G-F	GACATGCTGAGGTCCCTATGTCAGGAAGACCACTCTGGCCACAACGAGAAGAAGG
Pcoc462	13385191G-R	GATCCCTTCTTCTCGTTGTGGCCAGAGTGGTCTTCCTGACATAGGGACCTCAGCATGTC
Pcoc463	10486567A-F	AGACATGCTTGCTGACTCTAAGTTTAAATATCCCATTACACAGCAAGTTAAATAG
Pcoc464	10486567A-R	GATCCTATTTAACTTGCTGTGTAATGGGATATTTAAACTTAGAGTCAGCAAGCATGTCT
Pcoc465	10486567G-F	AGACATGCTTGCTGACTCTAAGTTTAAGTATCCCATTACACAGCAAGTTAAATAG
Pcoc466	10486567G-R	GATCCTATTTAACTTGCTGTGTAATGGGATACTTAAACTTAGAGTCAGCAAGCATGTCT
Pcoc467	10086908C-F	CATGATGAAATGAAACCAGTGGTGTGACAGGGGAAGTTTGAGGTGATAGAAGAAC
Pcoc468	10086908C-R	GATCGTTCTTCTATCACCTCAAACTTCCCCTGTCACACCACTGGTTTCATTTCATCATG
Pcoc469	10086908T-F	CATGATGAAATGAAACCAGTGGTGTGATAGGGGAAGTTTGAGGTGATAGAAGAAC
Pcoc470	10086908T-R	GATCGTTCTTCTATCACCTCAAACTTCCCCTATCACACCACTGGTTTCATTTCATCATG
Pcoc471	2928679A-F	TCCAGTGATCCATTCAGGGTTTCGTGTATATCCATAACAATGGAACTCCATGGTC
Pcoc472	2928679A-R	GATCGACCATGGAGTTCCATTGTTATGGATATACACGAAACCCTGAATGGATCACTGGA
Pcoc473	2928679G-F	TCCAGTGATCCATTCAGGGTTTCGTGTGTATCCATAACAATGGAACTCCATGGTC
Pcoc474	2928679G-R	GATCGACCATGGAGTTCCATTGTTATGGATACACACGAAACCCTGAATGGATCACTGGA
Pcoc475	620861G-F	TAGATACACTAGCAGCTTACATCCTGAGCCTGGAAAAGCCACAGGCATTCAACTA
Pcoc476	620861G-R	GATCTAGTTGAATGCCTGTGGCTTTTCCAGGCTCAGGATGTAAGCTGCTAGTGTATCTA
Pcoc477	620861A-F	TAGATACACTAGCAGCTTACATCCTGAACCTGGAAAAGCCACAGGCATTCAACTA
Pcoc478	620861A-R	GATCTAGTTGAATGCCTGTGGCTTTTCCAGGTTCAGGATGTAAGCTGCTAGTGTATCTA
Pcoc479	12543663A-F	ATGTGGCCACCTCAATATGAATAGTTAAGGGTAGAGAAGCAAATAAGATCAAAGT
Pcoc480	12543663A-R	GATCACTTTGATCTTATTTGCTTCTCTACCCTTAACTATTCATATTGAGGTGGCCACAT
Pcoc481	12543663C-F	ATGTGGCCACCTCAATATGAATAGTTACGGGTAGAGAAGCAAATAAGATCAAAG
Pcoc482	12543663C-R	GATCACTTTGATCTTATTTGCTTCTCTACCCGTAACTATTCATATTGAGGTGGCCACAT
Pcoc483	1571801G-F	ACAGAAAGGTAAAGAAAGTTTCAAAATGATATGGAAAAGCCAGTATGTACACACT
Pcoc484	1571801G-R	GATCAGTGTGTACATACTGGCTTTTCCATATCATTTTGAAACTTTCTTTACCTTTCTGT
Pcoc485	1571801T-F	ACAGAAAGGTAAAGAAAGTTTCAAAATTATATGGAAAAGCCAGTATGTACACACT
Pcoc486	1571801T-R	GATCAGTGTGTACATACTGGCTTTTCCATATAATTTTGAAACTTTCTTTACCTTTCTGT
Pcoc487	2252004C-F	AGTTCCTCTGGCGACACAGCAAAAACTCTGTTCAGCTAAGATGGTAAGAATGTAG
Pcoc488	2252004C-R	GATCCTACATTCTTACCATCTTAGCTGAACAGAGTTTTTGCTGTGTCGCCAGAGGAACT
Pcoc489	2252004A-F	AGTTCCTCTGGCGACACAGCAAAAACTATGTTCAGCTAAGATGGTAAGAATGTAG
Pcoc490	2252004A-R	GATCCTACATTCTTACCATCTTAGCTGAACATAGTTTTTGCTGTGTCGCCAGAGGAACT
Pcoc491	4962416T-F	AGATTTTATGGAAGTTTCCTGACACCGTAGCAGTCTCAAGACACCAGTGCCTGAG
Pcoc492	4962416T-R	GATCCTCAGGCACTGGTGTCTTGAGACTGCTACGGTGTCAGGAAACTTCCATAAAATCT
Pcoc493	4962416C-F	AGATTTTATGGAAGTTTCCTGACACCGCAGCAGTCTCAAGACACCAGTGCCTGAG
Pcoc494	4962416C-R	GATCCTCAGGCACTGGTGTCTTGAGACTGCTGCGGTGTCAGGAAACTTCCATAAAATCT
Pcoc495	12418451A-F	AGGAAGCGGGAATCTGAGAGAGTTGCCAGGGCAAAATGTAGGCCCCCAGCCCCTG
Pcoc496	12418451A-R	GATCCAGGGGCTGGGGGCCTACATTTTGCCCTGGCAACTCTCTCAGATTCCCGCTTCCT
Pcoc497	12418451G-F	AGGAAGCGGGAATCTGAGAGAGTTGCCGGGGCAAAATGTAGGCCCCCAGCCCCTG
Pcoc498	12418451G-R	GATCCAGGGGCTGGGGGCCTACATTTTGCCCCGGCAACTCTCTCAGATTCCCGCTTCCT
Pcoc499	1938781G-F	CTCCCCTCCATGCATGAATGGATAAAGGCCCCGTGAACAAAAATAGAGTTCTTTA
Pcoc500	1938781G-R	GATCTAAAGAACTCTATTTTTGTTCACGGGGCCTTTATCCATTCATGCATGGAGGGGAG
Pcoc501	1938781A-F	CTCCCCTCCATGCATGAATGGATAAAGACCCCGTGAACAAAAATAGAGTTCTTTA
Pcoc502	1938781A-R	GATCTAAAGAACTCTATTTTTGTTCACGGGGTCTTTATCCATTCATGCATGGAGGGGAG
Pcoc503	138213197C-F	GACACTCGGCAGGAGTAGTACCCGCCTCCAAAGTAACCATAAGGCACGGGAGCTG
Pcoc504	138213197C-R	GATCCAGCTCCCGTGCCTTATGGTTACTTTGGAGGCGGGTACTACTCCTGCCGAGTGTC
Pcoc505	138213197T-F	GACACTCGGCAGGAGTAGTACCCGCCTTCAAAGTAACCATAAGGCACGGGAGCTG
Pcoc506	138213197T-R	GATCCAGCTCCCGTGCCTTATGGTTACTTTGAAGGCGGGTACTACTCCTGCCGAGTGTC
Pcoc507	11649743A-F	ACTGGCAGAACTGGGCCTTTGTGATTCATCTGTTTTATTTGCATTATCTCTCACC
Pcoc508	11649743A-R	GATCGGTGAGAGATAATGCAAATAAAACAGATGAATCACAAAGGCCCAGTTCTGCCAGT
Pcoc509	11649743G-F	ACTGGCAGAACTGGGCCTTTGTGATTCGTCTGTTTTATTTGCATTATCTCTCACC
Pcoc510	11649743G-R	GATCGGTGAGAGATAATGCAAATAAAACAGACGAATCACAAAGGCCCAGTTCTGCCAGT
Pcoc511	887391T-F	TCGGTTTCACGTAAAGATATATAATGGTATCGTCCCTGGAGAGCGTGGCCATTTT
Pcoc512	887391T-R	GATCAAAATGGCCACGCTCTCCAGGGACGATACCATTATATATCTTTACGTGAAACCGA
Pcoc513	887391C-F	TCGGTTTCACGTAAAGATATATAATGGCATCGTCCCTGGAGAGCGTGGCCATTTT
Pcoc514	887391C-R	GATCAAAATGGCCACGCTCTCCAGGGACGATGCCATTATATATCTTTACGTGAAACCGA
Pcoc515	9623117C-F	TTCTCTCCCTGTTACTCTTAAGTAGTGCCTCCTTTCCCCATCCACCCCATCTCTA
Pcoc516	9623117C-R	GATCTAGAGATGGGGTGGATGGGGAAAGGAGGCACTACTTAAGAGTAACAGGGAGAGAA
Pcoc517	9623117T-F	TTCTCTCCCTGTTACTCTTAAGTAGTGTCTCCTTTCCCCATCCACCCCATCTCTA
Pcoc518	9623117T-R	GATCTAGAGATGGGGTGGATGGGGAAAGGAGACACTACTTAAGAGTAACAGGGAGAGAA
Pcoc519	925013A-F	TTAGGGCTCTTTCTGACCTCCACCATGATACTAGGACCCCATTGTATTCTGTACC
Pcoc520	925013A-R	GATCGGTACAGAATACAATGGGGTCCTAGTATCATGGTGGAGGTCAGAAAGAGCCCTAA
Pcoc521	925013C-F	TTAGGGCTCTTTCTGACCTCCACCATGCTACTAGGACCCCATTGTATTCTGTACC
Pcoc522	925013C-R	GATCGGTACAGAATACAATGGGGTCCTAGTAGCATGGTGGAGGTCAGAAAGAGCCCTAA
Pcoc523	925013T-F	TTAGGGCTCTTTCTGACCTCCACCATGTTACTAGGACCCCATTGTATTCTGTACC
Pcoc524	925013T-R	GATCGGTACAGAATACAATGGGGTCCTAGTAACATGGTGGAGGTCAGAAAGAGCCCTAA
Pcoc525	10788160A-F	CACCTTAATAATTGAATCTCATGGCCAAGTGTGATGGCTCATGCCTGTAACCCCA
Pcoc526	10788160A-R	GATCTGGGGTTACAGGCATGAGCCATCACACGTGGCCATGAGATTCAATTATTAAGGTG
Pcoc527	10788160G-F	CACCTTAATAATTGAATCTCATGGCCAGGTGTGATGGCTCATGCCTGTAACCCCA
Pcoc528	10788160G-R	GATCTGGGGTTACAGGCATGAGCCATCACACCTGGCCATGAGATTCAATTATTAAGGTG
Pcoc529	2736098C-F	TGGTGGCCGCGATGTGGATGGGGGGCCCGCGTGGTGCTGGCGGCCCACGGATGGG
Pcoc530	2736098C-R	GATCCCCATCCGTGGGCCGCCAGCACCACGCGGGCCCCCCATCCACATCGCGGCCACCA
Pcoc531	2736098T-F	TGGTGGCCGCGATGTGGATGGGGGGCCTGCGTGGTGCTGGCGGCCCACGGATGGG
Pcoc532	2736098T-R	GATCCCCATCCGTGGGCCGCCAGCACCACGCAGGCCCCCCATCCACATCGCGGCCACCA
Pcoc533	11067228A-F	TATAAAATTTTAACGCATGGATTTCCCATTGTTCGGGTGTCTGTGGGGCACCAGC
Pcoc534	11067228A-R	GATCGCTGGTGCCCCACAGACACCCGAACAATGGGAAATCCATGCGTTAAAATTTTATA
Pcoc535	11067228G-F	TATAAAATTTTAACGCATGGATTTCCCGTTGTTCGGGTGTCTGTGGGGCACCAGC
Pcoc536	11067228G-R	GATCGCTGGTGCCCCACAGACACCCGAACAACGGGAAATCCATGCGTTAAAATTTTATA
Pcoc537	17632542T-F	AACTTCAGTGTGTGGACCTCCATGTTATTTCCAATGACGTGTGTGCGCAAGTTCA
Pcoc538	17632542T-R	GATCTGAACTTGCGCACACACGTCATTGGAAATAACATGGAGGTCCACACACTGAAGTT
Pcoc539	17632542C-F	AACTTCAGTGTGTGGACCTCCATGTTACTTCCAATGACGTGTGTGCGCAAGTTCA
Pcoc540	17632542C-R	GATCTGAACTTGCGCACACACGTCATTGGAAGTAACATGGAGGTCCACACACTGAAGTT
Pcoc541	11704416G-F	TCCAGCTTGCTATCCCCCCTTCCCCCAGCTTGTGGGTTATTGCAGAATTGTTCAC
Pcoc542	11704416G-R	GATCGTGAACAATTCTGCAATAACCCACAAGCTGGGGGAAGGGGGGATAGCAAGCTGGA
Pcoc543	11704416C-F	TCCAGCTTGCTATCCCCCCTTCCCCCACCTTGTGGGTTATTGCAGAATTGTTCAC
Pcoc544	11704416C-R	GATCGTGAACAATTCTGCAATAACCCACAAGGTGGGGGAAGGGGGGATAGCAAGCTGGA
Pcoc545	10503733G-F	GATAGAAGGAAAACATTGTTGTTAGACGCAAGTCTCTGACATTCATTTCCCCTCT
Pcoc546	10503733G-R	GATCAGAGGGGAAATGAATGTCAGAGACTTGCGTCTAACAACAATGTTTTCCTTCTATC
Pcoc547	10503733T-F	GATAGAAGGAAAACATTGTTGTTAGACTCAAGTCTCTGACATTCATTTCCCCTCT
Pcoc548	10503733T-R	GATCAGAGGGGAAATGAATGTCAGAGACTTGAGTCTAACAACAATGTTTTCCTTCTATC
Pcoc549	4463179A-F	GAGAATGTGGACATGCTAAAAGCATTGACACATTTAAATTGAAAAAAAAAAATCT
Pcoc550	4463179A-R	GATCAGATTTTTTTTTTTCAATTTAAATGTGTCAATGCTTTTAGCATGTCCACATTCTC
Pcoc551	4463179G-F	GAGAATGTGGACATGCTAAAAGCATTGGCACATTTAAATTGAAAAAAAAAAATCT
Pcoc552	4463179G-R	GATCAGATTTTTTTTTTTCAATTTAAATGTGCCAATGCTTTTAGCATGTCCACATTCTC
Pcoc553	6005451C-F	GAGCAGGGAGTTGAAGCTGGCGATATTCGCCCCAACAGAGTGGGCAGAGCAGCTG
Pcoc554	6005451C-R	GATCCAGCTGCTCTGCCCACTCTGTTGGGGCGAATATCGCCAGCTTCAACTCCCTGCTC
Pcoc555	6005451T-F	GAGCAGGGAGTTGAAGCTGGCGATATTTGCCCCAACAGAGTGGGCAGAGCAGCTG
Pcoc556	6005451T-R	GATCCAGCTGCTCTGCCCACTCTGTTGGGGCAAATATCGCCAGCTTCAACTCCCTGCTC
Pcoc557	7929962C-F	ACTCCATCCATGGCTCTTTGTTTTATACTTTATCCAATAGGCAGTAAGGACCTCA
Pcoc558	7929962C-R	GATCTGAGGTCCTTACTGCCTATTGGATAAAGTATAAAACAAAGAGCCATGGATGGAGT
Pcoc559	7929962T-F	ACTCCATCCATGGCTCTTTGTTTTATATTTTATCCAATAGGCAGTAAGGACCTCA
Pcoc560	7929962T-R	GATCTGAGGTCCTTACTGCCTATTGGATAAAATATAAAACAAAGAGCCATGGATGGAGT
Pcoc561	10774740G-F	TGTCATGAGCTGCTTTTGAAGTAGTCCGTTAAAAATCAAAAGGCCCCAAAGCTCT
Pcoc562	10774740G-R	GATCAGAGCTTTGGGGCCTTTTGATTTTTAACGGACTACTTCAAAAGCAGCTCATGACA
Pcoc563	10774740T-F	TGTCATGAGCTGCTTTTGAAGTAGTCCTTTAAAAATCAAAAGGCCCCAAAGCTCT
Pcoc564	10774740T-R	GATCAGAGCTTTGGGGCCTTTTGATTTTTAAAGGACTACTTCAAAAGCAGCTCATGACA
Pcoc565	7126629A-F	TAAGAGGTGGGAGAGGCCCCACATCTGAGTGTCCACACCATAATGGGGAAAGGGT
Pcoc566	7126629A-R	GATCACCCTTTCCCCATTATGGTGTGGACACTCAGATGTGGGGCCTCTCCCACCTCTTA
Pcoc567	7126629C-F	TAAGAGGTGGGAGAGGCCCCACATCTGCGTGTCCACACCATAATGGGGAAAGGGT
Pcoc568	7126629C-R	GATCACCCTTTCCCCATTATGGTGTGGACACGCAGATGTGGGGCCTCTCCCACCTCTTA
Pcoc569	7629490C-F	CTTTTTGGAAGTGTTCCAAATAAGACTCGTATCAATTGATATAACTAACGGTGCT
Pcoc570	7629490C-R	GATCAGCACCGTTAGTTATATCAATTGATACGAGTCTTATTTGGAACACTTCCAAAAAG
Pcoc571	7629490T-F	CTTTTTGGAAGTGTTCCAAATAAGACTTGTATCAATTGATATAACTAACGGTGCT
Pcoc572	7629490T-R	GATCAGCACCGTTAGTTATATCAATTGATACAAGTCTTATTTGGAACACTTCCAAAAAG
Pcoc573	11228583G-F	GGCTTCCCTGCCCCTACGCTGAAGGATGCTCCTTGACTGTGAGTGGGACTGTGGG
Pcoc574	11228583G-R	GATCCCCACAGTCCCACTCACAGTCAAGGAGCATCCTTCAGCGTAGGGGCAGGGAAGCC
Pcoc575	11228583T-F	GGCTTCCCTGCCCCTACGCTGAAGGATTCTCCTTGACTGTGAGTGGGACTGTGGG
Pcoc576	11228583T-R:	GATCCCCACAGTCCCACTCACAGTCAAGGAGAATCCTTCAGCGTAGGGGCAGGGAAGCC
Pcoc577	12198220G-F	ATGACAAAGACTACAGGGAAGTTGGAGGGTGCTCAAGGAGCTCATAGCAGAAGCA
Pcoc578	12198220G-R:	GATCTGCTTCTGCTATGAGCTCCTTGAGCACCCTCCAACTTCCCTGTAGTCTTTGTCAT
Pcoc579	12198220T-F	ATGACAAAGACTACAGGGAAGTTGGAGTGTGCTCAAGGAGCTCATAGCAGAAGCA
Pcoc580	12198220T-R:	GATCTGCTTCTGCTATGAGCTCCTTGAGCACACTCCAACTTCCCTGTAGTCTTTGTCAT
Pcoc581	6545977A-F	GCCTACAACATAATATGTGCTATATGGAATGCCAGTGAGTCCAGAGGCAGTGGCT
Pcoc582	6545977A-R	GATCAGCCACTGCCTCTGGACTCACTGGCATTCCATATAGCACATATTATGTTGTAGGC
Pcoc583	6545977G-F	GCCTACAACATAATATGTGCTATATGGGATGCCAGTGAGTCCAGAGGCAGTGGCT
Pcoc584	6545977G-R	GATCAGCCACTGCCTCTGGACTCACTGGCATCCCATATAGCACATATTATGTTGTAGGC
Pcoc585	2219968G-F	AAACTGAACAGAGATATGTACCCCATGGAATCAAGATGACATTTAAACATTGAGA
Pcoc586	2219968G-R	GATCTCTCAATGTTTAAATGTCATCTTGATTCCATGGGGTACATATCTCTGTTCAGTTT
Pcoc587	2219968A-F	AAACTGAACAGAGATATGTACCCCATGAAATCAAGATGACATTTAAACATTGAGA
Pcoc588	2219968A-R	GATCTCTCAATGTTTAAATGTCATCTTGATTTCATGGGGTACATATCTCTGTTCAGTTT
Pcoc589	290258A-F	TTTGCCTCATATTGTACATGAAAATTAACTCAAAATGGATGTTGGGCATAAATGT
Pcoc590	290258A-R	GATCACATTTATGCCCAACATCCATTTTGAGTTAATTTTCATGTACAATATGAGGCAAA
Pcoc591	290258G-F	TTTGCCTCATATTGTACATGAAAATTAGCTCAAAATGGATGTTGGGCATAAATGT
Pcoc592	290258G-R	GATCACATTTATGCCCAACATCCATTTTGAGCTAATTTTCATGTACAATATGAGGCAAA
Pcoc593	11637980A-F	TGAGCACATTCTTATTTTAAATCTATCACAAATGTATTATTACTTATTCATTTTT
Pcoc594	11637980A-R	GATCAAAAATGAATAAGTAATAATACATTTGTGATAGATTTAAAATAAGAATGTGCTCA
Pcoc595	11637980G-F	TGAGCACATTCTTATTTTAAATCTATCGCAAATGTATTATTACTTATTCATTTTT
Pcoc596	11637980G-R	GATCAAAAATGAATAAGTAATAATACATTTGCGATAGATTTAAAATAAGAATGTGCTCA
Pcoc597	12682851A-F	ACTTTTCTCCTAACATTCTAGTATCTCATCTTAAAATGACAGTAAGTGTAGCTGA
Pcoc598	12682851A-R	GATCTCAGCTACACTTACTGTCATTTTAAGATGAGATACTAGAATGTTAGGAGAAAAGT
Pcoc599	12682851G-F	ACTTTTCTCCTAACATTCTAGTATCTCGTCTTAAAATGACAGTAAGTGTAGCTGA
Pcoc600	12682851G-R	GATCTCAGCTACACTTACTGTCATTTTAAGACGAGATACTAGAATGTTAGGAGAAAAGT
Pcoc601	1529276A-F	AGTGCTAATCATATATAGGTTTTATTAATACAAATGACAATATTTCAATTGGCTT
Pcoc602	1529276A-R	GATCAAGCCAATTGAAATATTGTCATTTGTATTAATAAAACCTATATATGATTAGCACT
Pcoc603	1529276T-F	AGTGCTAATCATATATAGGTTTTATTATTACAAATGACAATATTTCAATTGGCTT
Pcoc604	1529276T-R	GATCAAGCCAATTGAAATATTGTCATTTGTAATAATAAAACCTATATATGATTAGCACT
Pcoc605	2711721C-F	CCTGAATAACCCAGACTTAAGGAAATACATAGTCAACTGTTGAGAGTGTCTTATC
Pcoc606	2711721C-R	GATCGATAAGACACTCTCAACAGTTGACTATGTATTTCCTTAAGTCTGGGTTATTCAGG
Pcoc607	2711721T-F	CCTGAATAACCCAGACTTAAGGAAATATATAGTCAACTGTTGAGAGTGTCTTATC
Pcoc608	2711721T-R	GATCGATAAGACACTCTCAACAGTTGACTATATATTTCCTTAAGTCTGGGTTATTCAGG
Pcoc609	10090154C-F	AAAATCTCTGCAAGATTTTTTTGTAAACATAGCTAAAACAATATTGGAAAAAAAA
Pcoc610	10090154C-R:	GATCTTTTTTTTCCAATATTGTTTTAGCTATGTTTACAAAAAAATCTTGCAGAGATTTT
Pcoc611	10090154T-F	AAAATCTCTGCAAGATTTTTTTGTAAATATAGCTAAAACAATATTGGAAAAAAAA
Pcoc612	10090154T-R	GATCTTTTTTTTCCAATATTGTTTTAGCTATATTTACAAAAAAATCTTGCAGAGATTTT
Pcoc613	12485321A-F	TCTAGGAATAGAAAAGCAGAGTAAGAAAAAAAAGAGGCATTAGTGTTATTTATCA
Pcoc614	12485321A-R	GATCTGATAAATAACACTAATGCCTCTTTTTTTTCTTACTCTGCTTTTCTATTCCTAGA
Pcoc615	12485321G-F	TCTAGGAATAGAAAAGCAGAGTAAGAAGAAAAAGAGGCATTAGTGTTATTTATCA
Pcoc616	12485321G-R	GATCTGATAAATAACACTAATGCCTCTTTTTCTTCTTACTCTGCTTTTCTATTCCTAGA
Pcoc617	13192613G-F	TTTCCTGGAAACATACCACCTTCCAAGGTTGAGCTAGAAAGTAATTGAACCCCTA
Pcoc618	13192613G-R	GATCTAGGGGTTCAATTACTTTCTAGCTCAACCTTGGAAGGTGGTATGTTTCCAGGAAA
Pcoc619	13192613T-F	TTTCCTGGAAACATACCACCTTCCAAGTTTGAGCTAGAAAGTAATTGAACCCCTA
Pcoc620	13192613T-R	GATCTAGGGGTTCAATTACTTTCTAGCTCAAACTTGGAAGGTGGTATGTTTCCAGGAAA
Pcoc621	16867225A-F	TGTGTTTAAATTTGCAGCGTCACACTCACAGAATGGAAAAAGATATTGTAGGACA
Pcoc622	16867225A-R	GATCTGTCCTACAATATCTTTTTCCATTCTGTGAGTGTGACGCTGCAAATTTAAACACA
Pcoc623	16867225G-F	TGTGTTTAAATTTGCAGCGTCACACTCGCAGAATGGAAAAAGATATTGTAGGACA
Pcoc624	16867225G-R	GATCTGTCCTACAATATCTTTTTCCATTCTGCGAGTGTGACGCTGCAAATTTAAACACA
Pcoc625	16944141A-F	ATCCAGTCCGTGGTGCTTTATTTCAGGACATTTTGACAAGTGAACATAAAGCTCT
Pcoc626	16944141A-R	GATCAGAGCTTTATGTTCACTTGTCAAAATGTCCTGAAATAAAGCACCACGGACTGGAT
Pcoc627	16944141G-F	ATCCAGTCCGTGGTGCTTTATTTCAGGGCATTTTGACAAGTGAACATAAAGCTCT
Pcoc628	16944141G-R	GATCAGAGCTTTATGTTCACTTGTCAAAATGCCCTGAAATAAAGCACCACGGACTGGAT
Pcoc629	7789197A-F	GATATTAGCTCTATTTAATTTTAAGTGATATTATTCCCTATTCTGCAGAGCCGCT
Pcoc630	7789197A-R	GATCAGCGGCTCTGCAGAATAGGGAATAATATCACTTAAAATTAAATAGAGCTAATATC
Pcoc631	7789197G-F	GATATTAGCTCTATTTAATTTTAAGTGGTATTATTCCCTATTCTGCAGAGCCGCT
Pcoc632	7789197G-R	GATCAGCGGCTCTGCAGAATAGGGAATAATACCACTTAAAATTAAATAGAGCTAATATC
Pcoc633	10277209C-F	TACTACATTTCTTCTGCTAAAAATCTTCTCTCATATGTACCTTTCCAACCCTCCT
Pcoc634	10277209C-R	GATCAGGAGGGTTGGAAAGGTACATATGAGAGAAGATTTTTAGCAGAAGAAATGTAGTA
Pcoc635	10277209T-F	TACTACATTTCTTCTGCTAAAAATCTTTTCTCATATGTACCTTTCCAACCCTCCT
Pcoc636	10277209T-R	GATCAGGAGGGTTGGAAAGGTACATATGAGAAAAGATTTTTAGCAGAAGAAATGTAGTA
Pcoc637	11605083C-F	AAGGCATTTTAGTATTAGGCAGTACAACGTTGCAATGTTGATAAGGGGTAATTGA
Pcoc638	11605083C-R	GATCTCAATTACCCCTTATCAACATTGCAACGTTGTACTGCCTAATACTAAAATGCCTT
Pcoc639	11605083T-F	AAGGCATTTTAGTATTAGGCAGTACAATGTTGCAATGTTGATAAGGGGTAATTGA
Pcoc640	11605083T-R	GATCTCAATTACCCCTTATCAACATTGCAACATTGTACTGCCTAATACTAAAATGCCTT
Pcoc641	6763848C-F	TACTGCCTAGCACTGTGAACTGTTACACAATAACTGATGGAGAAGAATTTCATCT
Pcoc642	6763848C-R	GATCAGATGAAATTCTTCTCCATCAGTTATTGTGTAACAGTTCACAGTGCTAGGCAGTA
Pcoc643	6763848A-F	TACTGCCTAGCACTGTGAACTGTTACAAAATAACTGATGGAGAAGAATTTCATCT
Pcoc644	6763848A-R	GATCAGATGAAATTCTTCTCCATCAGTTATTTTGTAACAGTTCACAGTGCTAGGCAGTA
Pcoc645	9567349A-F	TTCAATCATTTGTCTGTTCGTTCAGTCAACAAATGTTTATTAAACATCTATTATG
Pcoc646	9567349A-F	GATCCATAATAGATGTTTAATAAACATTTGTTGACTGAACGAACAGACAAATGATTGAA
Pcoc647	9567349A-G:	TTCAATCATTTGTCTGTTCGTTCAGTCGACAAATGTTTATTAAACATCTATTATG
Pcoc648	9567349A-G	GATCCATAATAGATGTTTAATAAACATTTGTCGACTGAACGAACAGACAAATGATTGAA
Pcoc649	345013G-F	TGAAGATAATTTGAGAAAACTGAAAACGTAAGTATGGTTAAAGAAAAATGTACAA
Pcoc650	345013G-R	GATCTTGTACATTTTTCTTTAACCATACTTACGTTTTCAGTTTTCTCAAATTATCTTCA
Pcoc651	345013A-F	TGAAGATAATTTGAGAAAACTGAAAACATAAGTATGGTTAAAGAAAAATGTACAA
Pcoc652	345013A-R	GATCTTGTACATTTTTCTTTAACCATACTTATGTTTTCAGTTTTCTCAAATTATCTTCA
Pcoc653	8057939C-F	TATCATCCTGGAGCAGGACAAACCCTCCGAGAGCCTATGCCCAGCCCCAAAGCAC
Pcoc654	8057939C-R	GATCGTGCTTTGGGGCTGGGCATAGGCTCTCGGAGGGTTTGTCCTGCTCCAGGATGATA
Pcoc655	8057939T-F	TATCATCCTGGAGCAGGACAAACCCTCTGAGAGCCTATGCCCAGCCCCAAAGCAC
Pcoc656	8057939T-R	GATCGTGCTTTGGGGCTGGGCATAGGCTCTCAGAGGGTTTGTCCTGCTCCAGGATGATA
Pcoc657	9351730A-F	TATTCCAACTTATCTTCCACACTGCTCATGAAATTATTTTCTTAAAAAGAAAATT
Pcoc658	9351730A-R	GATCAATTTTCTTTTTAAGAAAATAATTTCATGAGCAGTGTGGAAGATAAGTTGGAATA
Pcoc659	9351730G-F	TATTCCAACTTATCTTCCACACTGCTCGTGAAATTATTTTCTTAAAAAGAAAATT
Pcoc660	9351730G-R	GATCAATTTTCTTTTTAAGAAAATAATTTCACGAGCAGTGTGGAAGATAAGTTGGAATA
Pcoc661	8064454A-F	AAGTTTATTTCTGGTCAATATTTCCACAGATATTTTTAGGATGGAAAAATACTTT
Pcoc662	8064454A-R	GATCAAAGTATTTTTCCATCCTAAAAATATCTGTGGAAATATTGACCAGAAATAAACTT
Pcoc663	8064454C-F	AAGTTTATTTCTGGTCAATATTTCCACCGATATTTTTAGGATGGAAAAATACTTT
Pcoc664	8064454C-R	GATCAAAGTATTTTTCCATCCTAAAAATATCGGTGGAAATATTGACCAGAAATAAACTT
Pcoc665	17765344A-F	ATATCTTTCTGCACTTTTAATATTGTCATCCCGTGCTAACATTTTTTTTTTTTTT
Pcoc666	17765344A-R	GATCAAAAAAAAAAAAAATGTTAGCACGGGATGACAATATTAAAAGTGCAGAAAGATAT
Pcoc667	17765344G-F	ATATCTTTCTGCACTTTTAATATTGTCGTCCCGTGCTAACATTTTTTTTTTTTTT
Pcoc668	17765344G-R	GATCAAAAAAAAAAAAAATGTTAGCACGGGACGACAATATTAAAAGTGCAGAAAGATAT
Pcoc669	4793529C-F	GAAAATGGTTACTATTTCTACTTTTTGCGGTGCTAATGCATTTTCTCTGACAATA
Pcoc670	4793529C-R	GATCTATTGTCAGAGAAAATGCATTAGCACCGCAAAAAGTAGAAATAGTAACCATTTTC
Pcoc671	4793529T-F	GAAAATGGTTACTATTTCTACTTTTTGTGGTGCTAATGCATTTTCTCTGACAATA
Pcoc672	4793529T-R	GATCTATTGTCAGAGAAAATGCATTAGCACCACAAAAAGTAGAAATAGTAACCATTTTC
Pcoc673	7758229G-F	GGAGACTTCTAGACCTTAATAGCTACCGTCTTTTCTATAATTTAATGAGCAGTCA
Pcoc674	7758229G-R	GATCTGACTGCTCATTAAATTATAGAAAAGACGGTAGCTATTAAGGTCTAGAAGTCTCC
Pcoc675	7758229T-F	GGAGACTTCTAGACCTTAATAGCTACCTTCTTTTCTATAATTTAATGAGCAGTCA
Pcoc676	7758229T-R	GATCTGACTGCTCATTAAATTATAGAAAAGAAGGTAGCTATTAAGGTCTAGAAGTCTCC
Pcoc677	2430386C-F	TGCTGAGATTACAGGTGTGAGCCACCGCGCCCGGCCCGAACCTCTGAATTTATAG
Pcoc678	2430386C-R	GATCCTATAAATTCAGAGGTTCGGGCCGGGCGCGGTGGCTCACACCTGTAATCTCAGCA
Pcoc679	2430386T-F	TGCTGAGATTACAGGTGTGAGCCACCGTGCCCGGCCCGAACCTCTGAATTTATAG
Pcoc680	2430386T-R	GATCCTATAAATTCAGAGGTTCGGGCCGGGCACGGTGGCTCACACCTGTAATCTCAGCA
Pcoc681	7725218A-F	AGAATCCACTTGGACCAGGCCTGTGACAGGGCCCCTGGCTCCCAGCCCAGAGCTG
Pcoc682	7725218A-R:	GATCCAGCTCTGGGCTGGGAGCCAGGGGCCCTGTCACAGGCCTGGTCCAAGTGGATTCT
Pcoc683	7725218G-F	AGAATCCACTTGGACCAGGCCTGTGACGGGGCCCCTGGCTCCCAGCCCAGAGCTG
Pcoc684	7725218G-R	GATCCAGCTCTGGGCTGGGAGCCAGGGGCCCCGTCACAGGCCTGGTCCAAGTGGATTCT
Pcoc685	10505477A-F	TGCCCCTTTTCTAAATCTTCATCTCCAATTAAGGCTTCCTGTTTGATAGACAAGT
Pcoc686	10505477A-R	GATCACTTGTCTATCAAACAGGAAGCCTTAATTGGAGATGAAGATTTAGAAAAGGGGCA
Pcoc687	10505477G-F	TGCCCCTTTTCTAAATCTTCATCTCCAGTTAAGGCTTCCTGTTTGATAGACAAGT
Pcoc688	10505477G-R	GATCACTTGTCTATCAAACAGGAAGCCTTAACTGGAGATGAAGATTTAGAAAAGGGGCA
Pcoc689	12597458G-F	GTTAAGTAGAGAGAGGAAAGTGGGAAAGAGTCACCCGGGAGAGTGGAAACAGTAT
Pcoc690	12597458G-R	GATCATACTGTTTCCACTCTCCCGGGTGACTCTTTCCCACTTTCCTCTCTCTACTTAAC
Pcoc691	12597458T-F	GTTAAGTAGAGAGAGGAAAGTGGGAAATAGTCACCCGGGAGAGTGGAAACAGTAT
Pcoc692	12597458T-R	GATCATACTGTTTCCACTCTCCCGGGTGACTATTTCCCACTTTCCTCTCTCTACTTAAC
Pcoc693	784411C-F	GCATCTTCTGAGTTGAATCCTAAAGGACGAGAGTAAGACTAAAAAGAATGTTGGG
Pcoc694	784411C-R	GATCCCCAACATTCTTTTTAGTCTTACTCTCGTCCTTTAGGATTCAACTCAGAAGATGC
Pcoc695	784411T-F	GCATCTTCTGAGTTGAATCCTAAAGGATGAGAGTAAGACTAAAAAGAATGTTGGG
Pcoc696	784411T-R	GATCCCCAACATTCTTTTTAGTCTTACTCTCATCCTTTAGGATTCAACTCAGAAGATGC
Pcoc697	10795917A-F	ACAAAGATAAACTTCAAAACATTTGCAAAGTCTCCTTGAACATTCAGCTGAGTAC
Pcoc698	10795917A-F	GATCGTACTCAGCTGAATGTTCAAGGAGACTTTGCAAATGTTTTGAAGTTTATCTTTGT
Pcoc699	10795917G-F	ACAAAGATAAACTTCAAAACATTTGCAGAGTCTCCTTGAACATTCAGCTGAGTAC
Pcoc700	10795917G-F	GATCGTACTCAGCTGAATGTTCAAGGAGACTCTGCAAATGTTTTGAAGTTTATCTTTGT
Pcoc701	1916284T-F	AAACTGGTTATAGCAATGTCCTGATTTTTTCTCATCTCAAACTGTATCTTCAGAG
Pcoc702	1916284T-R	GATCCTCTGAAGATACAGTTTGAGATGAGAAAAAATCAGGACATTGCTATAACCAGTTT
Pcoc703	1916284C-F	AAACTGGTTATAGCAATGTCCTGATTTCTTCTCATCTCAAACTGTATCTTCAGAG
Pcoc704	1916284C-R	GATCCTCTGAAGATACAGTTTGAGATGAGAAGAAATCAGGACATTGCTATAACCAGTTT
Pcoc705	2005705G-F	TGGGAGCAATGTGAGATTTTTTCATTTGATGTGAACAGACACAATAACGGTTCAC
Pcoc706	2005705G-R	GATCGTGAACCGTTATTGTGTCTGTTCACATCAAATGAAAAAATCTCACATTGCTCCCA
Pcoc707	2005705A-F	TGGGAGCAATGTGAGATTTTTTCATTTAATGTGAACAGACACAATAACGGTTCAC
Pcoc708	2005705A-R	GATCGTGAACCGTTATTGTGTCTGTTCACATTAAATGAAAAAATCTCACATTGCTCCCA
Pcoc709	9649213A-F	ATATCTACAAGTTCTAAGTTTATGGGGAAAAGTATGCCTAGTTATTAATAGGCAT
Pcoc710	9649213A-R	GATCATGCCTATTAATAACTAGGCATACTTTTCCCCATAAACTTAGAACTTGTAGATAT
Pcoc711	9649213G-F	ATATCTACAAGTTCTAAGTTTATGGGGGAAAGTATGCCTAGTTATTAATAGGCAT
Pcoc712	9649213G-R	GATCATGCCTATTAATAACTAGGCATACTTTCCCCCATAAACTTAGAACTTGTAGATAT
Pcoc713	2523395G-F	TACAATGCAGTGACAATTAGTAGGTTCGCAATGTTATGTAGCCATCATCACTCTC
Pcoc714	2523395G-R	GATCGAGAGTGATGATGGCTACATAACATTGCGAACCTACTAATTGTCACTGCATTGTA
Pcoc715	2523395A-F	TACAATGCAGTGACAATTAGTAGGTTCACAATGTTATGTAGCCATCATCACTCTC
Pcoc716	2523395A-R	GATCGAGAGTGATGATGGCTACATAACATTGTGAACCTACTAATTGTCACTGCATTGTA
Pcoc717	6766510C-F	TCCTCACTCACTCTGTGTCACATTCTTCAACTGTGTTGATATCATTCAGCTGTGG
Pcoc718	6766510C-R	GATCCCACAGCTGAATGATATCAACACAGTTGAAGAATGTGACACAGAGTGAGTGAGGA
Pcoc719	6766510T-F	TCCTCACTCACTCTGTGTCACATTCTTTAACTGTGTTGATATCATTCAGCTGTGG
Pcoc720	6766510T-R	GATCCCACAGCTGAATGATATCAACACAGTTAAAGAATGTGACACAGAGTGAGTGAGGA
Pcoc721	735172T-F	CAGTCATAATTCTTCTTCATGGTGTGCTAGGAGGACTGTGTTTGGGGACCCGAGA
Pcoc722	735172T-R	GATCTCTCGGGTCCCCAAACACAGTCCTCCTAGCACACCATGAAGAAGAATTATGACTG
Pcoc723	735172C-F	CAGTCATAATTCTTCTTCATGGTGTGCCAGGAGGACTGTGTTTGGGGACCCGAGA
Pcoc724	735172C-R	GATCTCTCGGGTCCCCAAACACAGTCCTCCTGGCACACCATGAAGAAGAATTATGACTG
Pcoc725	7694725C-F	TTCCTCAGCATGCCACAATTACCCAAACTCAATAAAGCAAAAATAATGATACCTA
Pcoc726	7694725C-R	GATCTAGGTATCATTATTTTTGCTTTATTGAGTTTGGGTAATTGTGGCATGCTGAGGAA
Pcoc727	7694725T-F	TTCCTCAGCATGCCACAATTACCCAAATTCAATAAAGCAAAAATAATGATACCTA
Pcoc728	7694725T-R	GATCTAGGTATCATTATTTTTGCTTTATTGAATTTGGGTAATTGTGGCATGCTGAGGAA
Pcoc729	10498792C-F	ATCACACACAGACATGCATAATTCCCACAGTAGAATAAACATTTTAAATTATGAT
Pcoc730	10498792C-R	GATCATCATAATTTAAAATGTTTATTCTACTGTGGGAATTATGCATGTCTGTGTGTGAT
Pcoc731	10498792T-F	ATCACACACAGACATGCATAATTCCCATAGTAGAATAAACATTTTAAATTATGAT
Pcoc732	10498792T-R	GATCATCATAATTTAAAATGTTTATTCTACTATGGGAATTATGCATGTCTGTGTGTGAT
Pcoc733	12628051C-F	AGAAAAGAGACAGCCTGAAAAGTAACACATTCAGACTTTTAATGATAGCTTCTCT
Pcoc734	12628051C-R	GATCAGAGAAGCTATCATTAAAAGTCTGAATGTGTTACTTTTCAGGCTGTCTCTTTTCT
Pcoc735	12628051T-F	AGAAAAGAGACAGCCTGAAAAGTAACATATTCAGACTTTTAATGATAGCTTCTCT
Pcoc736	12628051T-R	GATCAGAGAAGCTATCATTAAAAGTCTGAATATGTTACTTTTCAGGCTGTCTCTTTTCT
Pcoc737	2400997C-F	CCAGCCTATCCGTGGTGTCTGTACCACCGCCCATTAGTCACTTAGCGGCCATCTC
Pcoc738	2400997C-R	GATCGAGATGGCCGCTAAGTGACTAATGGGCGGTGGTACAGACACCACGGATAGGCTGG
Pcoc739	2400997T-F	CCAGCCTATCCGTGGTGTCTGTACCACTGCCCATTAGTCACTTAGCGGCCATCTC
Pcoc740	2400997T-R	GATCGAGATGGCCGCTAAGTGACTAATGGGCAGTGGTACAGACACCACGGATAGGCTGG
Pcoc741	4466137T-F	CTTCTGAAGGGTCAGAGATAGGAAATTTTATATGAACAAACAAAATATCTCATTG
Pcoc742	4466137T-R	GATCCAATGAGATATTTTGTTTGTTCATATAAAATTTCCTATCTCTGACCCTTCAGAAG
Pcoc743	4466137G-F	CTTCTGAAGGGTCAGAGATAGGAAATTGTATATGAACAAACAAAATATCTCATTG
Pcoc744	4466137G-R	GATCCAATGAGATATTTTGTTTGTTCATATACAATTTCCTATCTCTGACCCTTCAGAAG
Pcoc745	6089829A-F	CCAACTCCAAACAGAAACCCTGTCTCCATGAATAACAACTACCCATTCCTCTCCA
Pcoc746	6089829A-F	GATCTGGAGAGGAATGGGTAGTTGTTATTCATGGAGACAGGGTTTCTGTTTGGAGTTGG
Pcoc747	6089829G-F	CCAACTCCAAACAGAAACCCTGTCTCCGTGAATAACAACTACCCATTCCTCTCCA
Pcoc748	6089829G-F	GATCTGGAGAGGAATGGGTAGTTGTTATTCACGGAGACAGGGTTTCTGTTTGGAGTTGG
Pcoc749	7717572A-F	CAGATAGATAAGAAAATTTGTTAAGGCAAAAAAGAGAAAACCAGGAAATTATAAT
Pcoc750	7717572A-R	GATCATTATAATTTCCTGGTTTTCTCTTTTTTGCCTTAACAAATTTTCTTATCTATCTG
Pcoc751	7717572G-F	CAGATAGATAAGAAAATTTGTTAAGGCGAAAAAGAGAAAACCAGGAAATTATAAT
Pcoc752	7717572G-R	GATCATTATAATTTCCTGGTTTTCTCTTTTTCGCCTTAACAAATTTTCTTATCTATCTG
Pcoc753	10885582C-F	AAACTGTGGTTCAGAAGAGCAAACTCACTTCTGAACAGGATATTTCAAAGGAGAA
Pcoc754	10885582C-R	GATCTTCTCCTTTGAAATATCCTGTTCAGAAGTGAGTTTGCTCTTCTGAACCACAGTTT
Pcoc755	10885582T-F	AAACTGTGGTTCAGAAGAGCAAACTCATTTCTGAACAGGATATTTCAAAGGAGAA
Pcoc756	10885582T-R	GATCTTCTCCTTTGAAATATCCTGTTCAGAAATGAGTTTGCTCTTCTGAACCACAGTTT
Pcoc757	12317459A-F	TTGCTCGGATTACACGGTGTACTTAAAATATAACCTTTATGACTATCTAAAATTA
Pcoc758	12317459A-R	GATCTAATTTTAGATAGTCATAAAGGTTATATTTTAAGTACACCGTGTAATCCGAGCAA
Pcoc759	12317459G-F	TTGCTCGGATTACACGGTGTACTTAAAGTATAACCTTTATGACTATCTAAAATTA
Pcoc760	12317459G-R	GATCTAATTTTAGATAGTCATAAAGGTTATACTTTAAGTACACCGTGTAATCCGAGCAA
Pcoc761	13258681C-F	ATTGAGTTAACAAAGCAATTTCAGTTTCTCTGAACTCCATTAATGCTTTTAAGTG
Pcoc762	13258681C-R	GATCCACTTAAAAGCATTAATGGAGTTCAGAGAAACTGAAATTGCTTTGTTAACTCAAT
Pcoc763	13258681T-F	ATTGAGTTAACAAAGCAATTTCAGTTTTTCTGAACTCCATTAATGCTTTTAAGTG
Pcoc764	13258681T-R	GATCCACTTAAAAGCATTAATGGAGTTCAGAAAAACTGAAATTGCTTTGTTAACTCAAT
Pcoc765	13398206C-F	GGTACCTGCAGGATGTTCCCAACCCATCCTGAGTGTTTTCCTTTCGCTTACCAAT
Pcoc766	13398206C-R	GATCATTGGTAAGCGAAAGGAAAACACTCAGGATGGGTTGGGAACATCCTGCAGGTACC
Pcoc767	13398206T-F	GGTACCTGCAGGATGTTCCCAACCCATTCTGAGTGTTTTCCTTTCGCTTACCAAT
Pcoc768	13398206T-R:	GATCATTGGTAAGCGAAAGGAAAACACTCAGAATGGGTTGGGAACATCCTGCAGGTACC
Pcoc769	3789080T-F	CAGCTGTTTCTCAGTATGTAAACCAGCTTCTTGGTGCAGTGGATATCAGAGTTCC
Pcoc770	3789080T-R	GATCGGAACTCTGATATCCACTGCACCAAGAAGCTGGTTTACATACTGAGAAACAGCTG
Pcoc771	3789080C-F	CAGCTGTTTCTCAGTATGTAAACCAGCCTCTTGGTGCAGTGGATATCAGAGTTCC
Pcoc772	3789080C-R	GATCGGAACTCTGATATCCACTGCACCAAGAGGCTGGTTTACATACTGAGAAACAGCTG
Pcoc773	4821941A-F	ACTAATTCGGGTCTCTTAAAATGCTCTATGGGGCCAAACAAATTGTGTGCCAGAT
Pcoc774	4821941A-R	GATCATCTGGCACACAATTTGTTTGGCCCCATAGAGCATTTTAAGAGACCCGAATTAGT
Pcoc775	4821941G-F	ACTAATTCGGGTCTCTTAAAATGCTCTGTGGGGCCAAACAAATTGTGTGCCAGAT
Pcoc776	4821941G-R	GATCATCTGGCACACAATTTGTTTGGCCCCACAGAGCATTTTAAGAGACCCGAATTAGT
Pcoc777	543686C-F	CTATTTCAACATGTTTGTTTAAAACGACGACACATTGTGCCCAAAGGTAAAAGAG
Pcoc778	543686C-R	GATCCTCTTTTACCTTTGGGCACAATGTGTCGTCGTTTTAAACAAACATGTTGAAATAG
Pcoc779	543686T-F	CTATTTCAACATGTTTGTTTAAAACGATGACACATTGTGCCCAAAGGTAAAAGAG
Pcoc780	543686T-R	GATCCTCTTTTACCTTTGGGCACAATGTGTCATCGTTTTAAACAAACATGTTGAAATAG
Pcoc781	5751168C-F	TCCAAGTATCCCTCTCGGTGAGGTTCTCAAATATTCCAACCAACCTCTAACCCAC
Pcoc782	5751168C-R	GATCGTGGGTTAGAGGTTGGTTGGAATATTTGAGAACCTCACCGAGAGGGATACTTGGA
Pcoc783	5751168T-F	TCCAAGTATCCCTCTCGGTGAGGTTCTTAAATATTCCAACCAACCTCTAACCCAC
Pcoc784	5751168T-R	GATCGTGGGTTAGAGGTTGGTTGGAATATTTAAGAACCTCACCGAGAGGGATACTTGGA
Pcoc785	6507016C-F	TTCAATAATAAATTCCAAAACAAATGCCGTATAGGTAACTTGAGATGCCTCAAAT
Pcoc786	6507016C-R	GATCATTTGAGGCATCTCAAGTTACCTATACGGCATTTGTTTTGGAATTTATTATTGAA
Pcoc787	6507016T-F	TTCAATAATAAATTCCAAAACAAATGCTGTATAGGTAACTTGAGATGCCTCAAAT
Pcoc788	6507016T-R	GATCATTTGAGGCATCTCAAGTTACCTATACAGCATTTGTTTTGGAATTTATTATTGAA
Pcoc789	7847271A-F	TGACAACCCCAAAGGGTATCTTCAGTCACTTTACTCTCATCTCTCAGAGATAAGA
Pcoc790	7847271A-R	GATCTCTTATCTCTGAGAGATGAGAGTAAAGTGACTGAAGATACCCTTTGGGGTTGTCA
Pcoc791	7847271G-F	TGACAACCCCAAAGGGTATCTTCAGTCGCTTTACTCTCATCTCTCAGAGATAAGA
Pcoc792	7847271G-R	GATCTCTTATCTCTGAGAGATGAGAGTAAAGCGACTGAAGATACCCTTTGGGGTTGTCA
Pcoc793	11720607G-F	CTGCCTCCTTTGAAAACTCCTCACATAGCTTTCCCCCTTGGTCTACTATGTTCCA
Pcoc794	11720607G-R	GATCTGGAACATAGTAGACCAAGGGGGAAAGCTATGTGAGGAGTTTTCAAAGGAGGCAG
Pcoc795	11720607T-F	CTGCCTCCTTTGAAAACTCCTCACATATCTTTCCCCCTTGGTCTACTATGTTCCA
Pcoc796	11720607T-R	GATCTGGAACATAGTAGACCAAGGGGGAAAGATATGTGAGGAGTTTTCAAAGGAGGCAG
Pcoc797	731174C-F	GAGACATGGGTTATAGCTGTTCACAAACCCCTCTCCTGTGAGCTCCTCCAGGACA
Pcoc798	731174C-R	GATCTGTCCTGGAGGAGCTCACAGGAGAGGGGTTTGTGAACAGCTATAACCCATGTCTC
Pcoc799	731174T-F	GAGACATGGGTTATAGCTGTTCACAAATCCCTCTCCTGTGAGCTCCTCCAGGACA
Pcoc800	731174T-R	GATCTGTCCTGGAGGAGCTCACAGGAGAGGGATTTGTGAACAGCTATAACCCATGTCTC
Pcoc801	998124A-F	GTATTTCCGAGTCCTGGGAGATAATAGAATAAACTCATGGAGGACCTGTCCTTGA
Pcoc802	998124A-R	GATCTCAAGGACAGGTCCTCCATGAGTTTATTCTATTATCTCCCAGGACTCGGAAATAC
Pcoc803	998124G-F	GTATTTCCGAGTCCTGGGAGATAATAGGATAAACTCATGGAGGACCTGTCCTTGA
Pcoc804	998124G-R	GATCTCAAGGACAGGTCCTCCATGAGTTTATCCTATTATCTCCCAGGACTCGGAAATAC
Pcoc805	742134A-F	GGGCGGAGTGTCCTGTCAGCAGGCATGAGGAATTAAAAATTAAGAACACCCAGGG
Pcoc806	742134A-R	GATCCCCTGGGTGTTCTTAATTTTTAATTCCTCATGCCTGCTGACAGGACACTCCGCCC
Pcoc807	742134G-F	GGGCGGAGTGTCCTGTCAGCAGGCATGGGGAATTAAAAATTAAGAACACCCAGGG
Pcoc808	742134G-R	GATCCCCTGGGTGTTCTTAATTTTTAATTCCCCATGCCTGCTGACAGGACACTCCGCCC
Pcoc809	1243647G-F	GCTCTCAGAGAACGCTCTGCTAGGGCGGTATGACAAAGACACCATCCTCACTGAG
Pcoc810	1243647G-R	GATCCTCAGTGAGGATGGTGTCTTTGTCATACCGCCCTAGCAGAGCGTTCTCTGAGAGC
Pcoc811	1243647A-F	GCTCTCAGAGAACGCTCTGCTAGGGCGATATGACAAAGACACCATCCTCACTGAG
Pcoc812	1243647A-R	GATCCTCAGTGAGGATGGTGTCTTTGTCATATCGCCCTAGCAGAGCGTTCTCTGAGAGC
Pcoc813	71277158G-F	ATAATACTGCCATCAGTGATATCAGTTGGATATTAGATCAGCATTAGGAAATGAC
Pcoc814	71277158G-R	GATCGTCATTTCCTAATGCTGATCTAATATCCAACTGATATCACTGATGGCAGTATTAT
Pcoc815	71277158T-F	ATAATACTGCCATCAGTGATATCAGTTTGATATTAGATCAGCATTAGGAAATGAC
Pcoc816	71277158T-R	GATCGTCATTTCCTAATGCTGATCTAATATCAAACTGATATCACTGATGGCAGTATTAT
Pcoc817	62113212C-F	ACACTCTATCATCCCCCGGATTCCTCTCTACTTGGTTCTCATTCTTCCTTTGACT
Pcoc818	62113212C-R	GATCAGTCAAAGGAAGAATGAGAACCAAGTAGAGAGGAATCCGGGGGATGATAGAGTGT
Pcoc819	62113212T-F	ACACTCTATCATCCCCCGGATTCCTCTTTACTTGGTTCTCATTCTTCCTTTGACT
Pcoc820	62113212T-R	GATCAGTCAAAGGAAGAATGAGAACCAAGTAAAGAGGAATCCGGGGGATGATAGAGTGT
Pcoc821	4489787C-F	ACACCCCAAGAAGGATGAACTCGGAGACAATGCTGTGGTTCCTCAGAATCAAACA
Pcoc822	4489787C-R:	GATCTGTTTGATTCTGAGGAACCACAGCATTGTCTCCGAGTTCATCCTTCTTGGGGTGT
Pcoc823	4489787T-F	ACACCCCAAGAAGGATGAACTCGGAGATAATGCTGTGGTTCCTCAGAATCAAACA
Pcoc824	4489787T-R	GATCTGTTTGATTCTGAGGAACCACAGCATTATCTCCGAGTTCATCCTTCTTGGGGTGT
Pcoc825	13252298A-F	AGCACTTGCTGTCTTCTCAGATACAATATCAGAAACTTATAATCCAAGAAAAATC
Pcoc826	13252298A-R	GATCGATTTTTCTTGGATTATAAGTTTCTGATATTGTATCTGAGAAGACAGCAAGTGCT
Pcoc827	13252298G-F	AGCACTTGCTGTCTTCTCAGATACAATGTCAGAAACTTATAATCCAAGAAAAATC
Pcoc828	13252298G-R	GATCGATTTTTCTTGGATTATAAGTTTCTGACATTGTATCTGAGAAGACAGCAAGTGCT
Pcoc829	188140481A-F	ATATAAAATCCAAGCATATATAAAATAAACGAAACAAAAAAATGCCATCAGCGTC
Pcoc830	188140481A-R	GATCGACGCTGATGGCATTTTTTTGTTTCGTTTATTTTATATATGCTTGGATTTTATAT
Pcoc831	188140481T-F	ATATAAAATCCAAGCATATATAAAATATACGAAACAAAAAAATGCCATCAGCGTC
Pcoc832	188140481T-R	GATCGACGCTGATGGCATTTTTTTGTTTCGTATATTTTATATATGCTTGGATTTTATAT
Pcoc833	1002979C-F	AAACATATAAGTATTCCTGAGTTACTACTAGGGTCATAGAAGAAAACATATTTCT
Pcoc834	1002979C-R	GATCAGAAATATGTTTTCTTCTATGACCCTAGTAGTAACTCAGGAATACTTATATGTTT
Pcoc835	1002979T-F	AAACATATAAGTATTCCTGAGTTACTATTAGGGTCATAGAAGAAAACATATTTCT
Pcoc836	1002979T-R	GATCAGAAATATGTTTTCTTCTATGACCCTAATAGTAACTCAGGAATACTTATATGTTT
Pcoc837	10940579A-F	ATGCACATTATCTTATATAATTCACACAGCAAGTAAACAACAGGGGAAATAATAG
Pcoc838	10940579A-Ｒ	GATCCTATTATTTCCCCTGTTGTTTACTTGCTGTGTGAATTATATAAGATAATGTGCAT
Pcoc839	10940579C-F	ATGCACATTATCTTATATAATTCACACCGCAAGTAAACAACAGGGGAAATAATAG
Pcoc840	10940579C-Ｒ	GATCCTATTATTTCCCCTGTTGTTTACTTGCGGTGTGAATTATATAAGATAATGTGCAT
Pcoc841	10940579T-F	ATGCACATTATCTTATATAATTCACACTGCAAGTAAACAACAGGGGAAATAATAG
Pcoc842	10940579T-Ｒ	GATCCTATTATTTCCCCTGTTGTTTACTTGCAGTGTGAATTATATAAGATAATGTGCAT
Pcoc843	9757252C-F	AAACTGATCCACATATGAATAATGAAGCAACAGATTTGAAACAGTAAAACTCATC
Pcoc844	9757252C-R	GATCGATGAGTTTTACTGTTTCAAATCTGTTGCTTCATTATTCATATGTGGATCAGTTT
Pcoc845	9757252T-F	AAACTGATCCACATATGAATAATGAAGTAACAGATTTGAAACAGTAAAACTCATC
Pcoc846	9757252T-R	GATCGATGAGTTTTACTGTTTCAAATCTGTTACTTCATTATTCATATGTGGATCAGTTT
Pcoc847	9311171G-F	CCTTTGCTTGCTCATAGTGGGCATTTTGTCAGGCCCTTCAGCTGCATTGTTGTGA
Pcoc848	9311171G-R	GATCTCACAACAATGCAGCTGAAGGGCCTGACAAAATGCCCACTATGAGCAAGCAAAGG
Pcoc849	9311171T-F	CCTTTGCTTGCTCATAGTGGGCATTTTTTCAGGCCCTTCAGCTGCATTGTTGTGA
Pcoc850	9311171T-R	GATCTCACAACAATGCAGCTGAAGGGCCTGAAAAAATGCCCACTATGAGCAAGCAAAGG
Pcoc851	17023900A-F	TTTCATGTTAAGAGCTAGACATGCCAAAATCTTTCAGAAACAGTGTAAATGATCA
Pcoc852	17023900A-R	GATCTGATCATTTACACTGTTTCTGAAAGATTTTGGCATGTCTAGCTCTTAACATGAAA
Pcoc853	17023900G-F	TTTCATGTTAAGAGCTAGACATGCCAAGATCTTTCAGAAACAGTGTAAATGATCA
Pcoc854	17023900G-R	GATCTGATCATTTACACTGTTTCTGAAAGATCTTGGCATGTCTAGCTCTTAACATGAAA
Pcoc855	13264970C-F	TTCCCATGGGAGTGATCATTGTTTCACCTTCCTCACAATATTGTAGTGATTTTTC
Pcoc856	13264970C-R	GATCGAAAAATCACTACAATATTGTGAGGAAGGTGAAACAATGATCACTCCCATGGGAA
Pcoc857	13264970T-F	TTCCCATGGGAGTGATCATTGTTTCACTTTCCTCACAATATTGTAGTGATTTTTC
Pcoc858	13264970T-R	GATCGAAAAATCACTACAATATTGTGAGGAAAGTGAAACAATGATCACTCCCATGGGAA
Pcoc859	1866967A-F	GAGAGAGGAAGAGCCTCATCAGATCACAGTCATCAAGGTGGAGGCTGTAATCTGT
Pcoc860	1866967A-R	GATCACAGATTACAGCCTCCACCTTGATGACTGTGATCTGATGAGGCTCTTCCTCTCTC
Pcoc861	1866967G-F	GAGAGAGGAAGAGCCTCATCAGATCACGGTCATCAAGGTGGAGGCTGTAATCTGT
Pcoc862	1866967G-R	GATCACAGATTACAGCCTCCACCTTGATGACCGTGATCTGATGAGGCTCTTCCTCTCTC

## Sheet: Table S3
Code	Primer name	Sequence(5'--3')
BarP6	luc3Q-r	CACGATCTGTCCGCACTGCTTGG
BarP25	luc5-2f	tgagtgaccgtgcgaggtcagtaca
BarP26	lucmd-2r	tcacctggtagcctcaggactcagtca
BarP27	lucmd-2f	ctctgactgagtcctgaggctaccagg
BarP28	luc3-2r	TTGCGTCGAGTGTCTCGGTCAGAC
NGqP002	Rp002-r	CCACGACCTTCGCTTCGCC
NGqP003	Rp003-r	AGATCCACGACCTTCGCTTCGTA
NGqP004	Rp004-2r	GATCCACGACCTTCGCTTCGGT
NGqP005	Rp005-2r	CAGATCCACGACCTTCGCTTTC
NGqP006	Rp006-r	CAGATCCACGACCTTCGCTTGA
NGqP007	Rp007-r	GCAGATCCACGACCTTCGCTTAT
NGqP008	Rp008-r	CAGATCCACGACCTTCGCGG
NGqP009	Rp009-r	GCAGATCCACGACCTTCGCAC
NGqP010	Rp010-r	CAGATCCACGACCTTCGCCA
NGqP011	Rp011-2r	GTAGGCAGATCCACGACCTTCAG
NGqP012	Rp012-2r	GTAGGCAGATCCACGACCTTCTA
NGqP013	Rp013-2r	GTAGGCAGATCCACGACCTTCCT
NGqP014	Rp014-2r	GTAGGCAGATCCACGACCTGG
NGqP015	Rp015-r	GGTAGGCAGATCCACGACCTCA
NGqP016	Rp016-r	CGGTAGGCAGATCCACGACCTAT
NGqP017	Rp017-2r	GGTAGGCAGATCCACGACGG
NGqP018	Rp018-2r	CGGTAGGCAGATCCACGACAC
NGqP019	Rp019-r	CCGGTAGGCAGATCCACGACTA
NGqP020	Rp020-r	CCGGTAGGCAGATCCACGGG
NGqP021-2	Rp021-2r	ACCGGTAGGCAGATCCACGCA
NGqP022-3	Rp022-3r	TACCGGTAGGCAGATCCACGTT
NGqP023-3	Rp023-3r	TTCTACCGGTAGGCAGATCCATC
NGqP024-3	Rp024-3r	TTCTACCGGTAGGCAGATCCAGA
NGqP025-3	Rp025-3r	GTTCTACCGGTAGGCAGATCCAAT
NGqP026-2	Rp026-2r	GTTCTACCGGTAGGCAGATCGG
NGqP027-2	Rp027-2r	CGTTCTACCGGTAGGCAGATCAC
NGqP028-2	Rp028-2r	GCGTTCTACCGGTAGGCAGATCTT
NGqP029-2	Rp029-2r	CGTTCTACCGGTAGGCAGAGG
NGqP030-2	Rp030-2r	GCGTTCTACCGGTAGGCAGACA
NGqP031-2	Rp031-2r	AGCGTTCTACCGGTAGGCAGAAT
NGqP032-2	Rp032-2r	CAGCGTTCTACCGGTAGGCATG
NGqP033-3	Rp033-3r	CAGCGTTCTACCGGTAGGCAAC
NGqP034-3	Rp034-3r	CAGCGTTCTACCGGTAGGCACT
NGqP035-2	Rp035-2r	ACAGCGTTCTACCGGTAGGGG
NGqP036-2	Rp036-2r	CACAGCGTTCTACCGGTAGGAC
NGqP037	Rp037-r	GCACAGCGTTCTACCGGTAGGTT
NGqP038-3	Rp038-3r	CGCACAGCGTTCTACCGGTAAC
NGqP039	Rp039-r	CGCACAGCGTTCTACCGGTACA
NGqP040-2	Rp040-2r	AACGCACAGCGTTCTACCGGTATT
NGqP041	Rp041-r	CGCACAGCGTTCTACCGGGG
NGqP042	Rp042-r	ACGCACAGCGTTCTACCGGAC
NGqP043	Rp043-r	CGCACAGCGTTCTACCGGCT
NGqP044	Rp044-r	GATCAACGCACAGCGTTCTACCAC
NGqP045-3	Rp045-3r	ATCAACGCACAGCGTTCTACCCA
NGqP046	Rp046-r	GATCAACGCACAGCGTTCTACCTT
NGqP047-2	Rp047-2r	CTGATCAACGCACAGCGTTCTAGG
NGqP048-2	Rp048-2r	TCTCTGATCAACGCACAGCGTTCTATA
NGqP049-2	Rp049-2r	TCTCTGATCAACGCACAGCGTTCTAAT
NGqP050-2	Rp050-2r	CTGATCAACGCACAGCGTTCGG
NGqP051-2	Rp051-2r	CTCTGATCAACGCACAGCGTTCAC
NGqP052-2	Rp052-2r	TCTGATCAACGCACAGCGTTCCT
NGqP053-2	Rp053-2r	CTCTGATCAACGCACAGCGTGG
NGqP054-2	Rp054-2r	TCTCTGATCAACGCACAGCGTCA
NGqP055-2	Rp055-2r	CTCTCTGATCAACGCACAGCGTAT
NGqP056	Rp056-r	CCTCTCTGATCAACGCACAGCAG
NGqP057	Rp057-r	CTCTCTGATCAACGCACAGCCC
NGqP058-2	Rp058-2r	CCTCTCTGATCAACGCACAGCTA
NGqP059	Rp059-r	CGCCTCTCTGATCAACGCACAAG
NGqP060	Rp060-r	CGCCTCTCTGATCAACGCACATA
NGqP061	Rp061-r	CGCCTCTCTGATCAACGCACACT
NGqP062	Rp062-r	CGCCTCTCTGATCAACGCAGG
NGqP063-2	Rp063-2r	TTCGCCTCTCTGATCAACGCAAC
NGqP064	Rp064-r	TTCGCCTCTCTGATCAACGCATT
NGqP065	Rp065-r	GTTCGCCTCTCTGATCAACGGG
NGqP066-2	Rp066-2r	AGTTCGCCTCTCTGATCAACGAC
NGqP067	Rp067-r	CAGTTCGCCTCTCTGATCAACGTT
NGqP068-2	Rp068-2r	GCAGTTCGCCTCTCTGATCAATC
NGqP069-2	Rp069-2r	GCAGTTCGCCTCTCTGATCAAGA
NGqP070	Rp070-r	CGCAGTTCGCCTCTCTGATCAAAT
NGqP071	Rp071-r	GCAGTTCGCCTCTCTGATCGG
NGqP072-2	Rp072-2r	GCAGTTCGCCTCTCTGATCCC
NGqP073-2	Rp073-2r	ACGCAGTTCGCCTCTCTGATCTT
NGqP074-4	Rp074-f	cggtagaacgctgtgcgttCC
NGqP075	Rp075-r	CACGCAGTTCGCCTCTCTGACA
NGqP076	Rp076-r	ACACGCAGTTCGCCTCTCTGAAT
NGqP077	Rp077-r	CACACGCAGTTCGCCTCTCTTG
NGqP078-2	Rp078-2r	TCACACGCAGTTCGCCTCTCTAC
NGqP079-2	Rp079-2r	CACACGCAGTTCGCCTCTCTCT
NGqP080	Rp080-r	CACACGCAGTTCGCCTCTGG
NGqP081-2	Rp081-2r	ACTCACACGCAGTTCGCCTCTAC
NGqP082-2	Rp082-2r	ACTCACACGCAGTTCGCCTCTTA
NGqP083	Rp083-r	ACTCACACGCAGTTCGCCTGG
NGqP084-2	Rp084-2r	CACTCACACGCAGTTCGCCTAC
NGqP085-2	Rp085-2r	CACTCACACGCAGTTCGCCTTA
NGqP086	Rp086-r	CACTCACACGCAGTTCGCGG
NGqP087	Rp087-r	CCACTCACACGCAGTTCGCAC
NGqP088	Rp088-r	GACCACTCACACGCAGTTCGCTA
NGqP089-3	Rp089-3r	GGACCACTCACACGCAGTTCAG
NGqP090-2	Rp090-2r	ATAGGACCACTCACACGCAGTTCTA
NGqP091-2	Rp091-2r	AGGACCACTCACACGCAGTTCCT
NGqP092-2	Rp092-2r	ATAGGACCACTCACACGCAGTGG
NGqP093-2	Rp093-2r	CATAGGACCACTCACACGCAGTCA
NGqP094-2	Rp094-2r	TCATAGGACCACTCACACGCAGTAT
NGqP095-2	Rp095-2r	GTCATAGGACCACTCACACGCAAG
NGqP096-2	Rp096-2r	TCATAGGACCACTCACACGCACC
NGqP097-2	Rp097-2r	TAGTCATAGGACCACTCACACGCATA
NGqP098-2	Rp098-2r	AGTCATAGGACCACTCACACGGG
NGqP099-2	Rp099-2r	GTAGTCATAGGACCACTCACACGAC
NGqP100-2	Rp100-2r	GTAGTCATAGGACCACTCACACGTT
NGqP101-2	Rp101-2r	ACGTAGTCATAGGACCACTCACATC
NGqP102-2	Rp102-2r	ACGTAGTCATAGGACCACTCACAGA
NGqP103-2	Rp103-2r	GACGTAGTCATAGGACCACTCACAAT
NGqP104-2	Rp104-2r	GACGTAGTCATAGGACCACTCAGG
NGqP105-2	Rp105-2r	GGACGTAGTCATAGGACCACTCAAC
NGqP106-3	Rp106-3r	CGGACGTAGTCATAGGACCACTCATT
NGqP107-2	Rp107-2r	GGACGTAGTCATAGGACCACTGG
NGqP108-2	Rp108-2r	CGGACGTAGTCATAGGACCACTAC
NGqP109-3	Rp109-3r	CGGACGTAGTCATAGGACCACTTT
NGqP110-2	Rp110-2r	CGGACGTAGTCATAGGACCAGG
NGqP111-2	Rp111-2r	CCGGACGTAGTCATAGGACCAAC
NGqP112-2	Rp112-2r	AACCGGACGTAGTCATAGGACCATA
NGqP113-2	Rp113-2r	AACCGGACGTAGTCATAGGACGG
NGqP114-3	Rp114-3r	TAACCGGACGTAGTCATAGGACAC
NGqP115-2	Rp115-2r	CTAACCGGACGTAGTCATAGGACTT
NGqP116-3	Rp116-3r	TAACCGGACGTAGTCATAGGGG
NGqP117-3	Rp117-3r	CTAACCGGACGTAGTCATAGGCA
NGqP118-2	Rp118-2r	ACCTAACCGGACGTAGTCATAGGTT
NGqP119-3	Rp119-3r	TGTACCTAACCGGACGTAGTCATAAC
NGqP120-2	Rp120-2r	GTACCTAACCGGACGTAGTCATACA
NGqP121-3	Rp121-3r	TGTACCTAACCGGACGTAGTCATATT
NGqP122-2	Rp122-2r	GTACCTAACCGGACGTAGTCAGG
NGqP123-3	Rp123-3r	TGTACCTAACCGGACGTAGTCAAC
NGqP124-3	Rp124-3r	TGTACCTAACCGGACGTAGTCACT
NGqP125-2	Rp125-2r	GTGTACCTAACCGGACGTAGTGG
NGqP126-3	Rp126-3r	TGTGTACCTAACCGGACGTAGTAC
NGqP127-2	Rp127-2r	CTGTGTACCTAACCGGACGTAGTTT
NGqP128-3	Rp128-3r	ACTGTGTACCTAACCGGACGTAAG
NGqP129-2	Rp129-2r	CTGTGTACCTAACCGGACGTACC
NGqP130-2	Rp130-2r	GACTGTGTACCTAACCGGACGTATA
NGqP131-3	Rp131-3r	CTGTGTACCTAACCGGACGGG
NGqP132-2	Rp132-2r	GACTGTGTACCTAACCGGACGAC
NGqP133-2	Rp133-2r	GACTGTGTACCTAACCGGACGCT
NGqP134-2	Rp134-2r	GCGACTGTGTACCTAACCGGATC
NGqP135-3	Rp135-3r	CGACTGTGTACCTAACCGGAGA
NGqP136-2	Rp136-2r	GCGACTGTGTACCTAACCGGAAT
NGqP137-3	Rp137-3r	CGCGACTGTGTACCTAACCGTG
NGqP138-3	Rp138-3r	CGCGACTGTGTACCTAACCGAC
NGqP139-3	Rp139-3r	GCGACTGTGTACCTAACCGCT
NGqP140-3	Rp140-3r	CTTCGCGACTGTGTACCTAACTC
NGqP141-2	Rp141-2r	CTTCGCGACTGTGTACCTAACGA
NGqP142-2	Rp142-2r	GCTTCGCGACTGTGTACCTAACAT
NGqP143-2	Rp143-2r	GCTTCGCGACTGTGTACCTAGG
NGqP144-2	Rp144-2r	CGCTTCGCGACTGTGTACCTACA
NGqP145-2	Rp145-2r	TCGCTTCGCGACTGTGTACCTATT
NGqP146	Rp146-r	GCTTCGCGACTGTGTACCGG
NGqP147-2	Rp147-2r	CGCTTCGCGACTGTGTACCAC
NGqP148-4	Rp148-1f	ggtcctatgactacgtccggtAG
NGqP149-4	Rp149-1f	gtcctatgactacgtccggttaCC
NGqP150-3	Rp150-1f	agtggtcctatgactacgtccggttaTA
NGqP151-3	Rp151-1f	agtggtcctatgactacgtccggttaAT
NGqP152-3	Rp152-1f	ctatgactacgtccggttaggCC
NGqP153-3	Rp153-1f	cctatgactacgtccggttaggGT
NGqP154-4	Rp154-3r	GTTGGTCGCTTCGCGACTGTGCT
NGqP155-2	Rp155-1f	ctatgactacgtccggttaggtaGT
NGqP156-3	Rp156-1f	ctatgactacgtccggttaggtaTC
NGqP157-3	Rp157-1f	ctatgactacgtccggttaggtaAG
NGqP158-3	Rp158-1f	atgactacgtccggttaggtacaGT
NGqP159-3	Rp159-1f	atgactacgtccggttaggtacaTC
NGqP160-3	Rp160-1f	atgactacgtccggttaggtacaAG
NGqP161	Rp161-f	ACTACGTCCGGTTAGGTACACAAG
NGqP162	Rp162-f	CTACGTCCGGTTAGGTACACACC
NGqP163	Rp163-f	GACTACGTCCGGTTAGGTACACATA
NGqP164	Rp164-f	TACGTCCGGTTAGGTACACAGTTC
NGqP165	Rp165-f	TACGTCCGGTTAGGTACACAGTGA
NGqP166-2	Rp166-r	GATCAAGGCGTTGGTCGCTTCGAT
NGqP167	Rp167-f	GTCCGGTTAGGTACACAGTCGTC
NGqP168	Rp168-f	GTCCGGTTAGGTACACAGTCGGA
NGqP169	Rp169-f	GTCCGGTTAGGTACACAGTCGAT
NGqP170	Rp170-f	GGTTAGGTACACAGTCGCGGG
NGqP171	Rp171-f	GGTTAGGTACACAGTCGCGCC
NGqP172	Rp172-f	CCGGTTAGGTACACAGTCGCGTT
NGqP173	Rp173-f	CGGTTAGGTACACAGTCGCGAAAG
NGqP174	Rp174-f	CGGTTAGGTACACAGTCGCGAATA
NGqP175	Rp175-f	CGGTTAGGTACACAGTCGCGAACT
NGqP176	Rp176-f	TTAGGTACACAGTCGCGAAGCTG
NGqP177	Rp177-f	GTTAGGTACACAGTCGCGAAGCAC
NGqP178	Rp178-f	GTTAGGTACACAGTCGCGAAGCCT
NGqP179	Rp179-f	GTACACAGTCGCGAAGCGAGG
NGqP180	Rp180-f	TTAGGTACACAGTCGCGAAGCGATA
NGqP181	Rp181-f	TTAGGTACACAGTCGCGAAGCGAAT
NGqP182-2	Rp182-2f	ACACAGTCGCGAAGCGACCGG
NGqP183	Rp183-f	CACAGTCGCGAAGCGACCCC
NGqP184-2	Rp184-2f	GGTACACAGTCGCGAAGCGACCTT
NGqP185	Rp185-f	CACAGTCGCGAAGCGACCAATC
NGqP186-2	Rp186-2f	ACACAGTCGCGAAGCGACCAAGA
NGqP187-2	Rp187-2f	GTACACAGTCGCGAAGCGACCAAAT
NGqP188	Rp188-f	GTCGCGAAGCGACCAACGGG
NGqP189-2	Rp189-2f	ACAGTCGCGAAGCGACCAACGTA
NGqP190-2	Rp190-2f	ACAGTCGCGAAGCGACCAACGAT
NGqP191	Rp191-f	GCGAAGCGACCAACGCCGG
NGqP192	Rp192-f	CGCGAAGCGACCAACGCCAC
NGqP193	Rp193-f	CGCGAAGCGACCAACGCCCA
NGqP194	Rp194-f	GCGAAGCGACCAACGCCTTTG
NGqP195	Rp195-f	GCGAAGCGACCAACGCCTTAC
NGqP196	Rp196-f	GCGAAGCGACCAACGCCTTCT
NGqP197	Rp197-f	GAAGCGACCAACGCCTTGAGG
NGqP198	Rp198-f	CGAAGCGACCAACGCCTTGACA
NGqP199	Rp199-f	GCGAAGCGACCAACGCCTTGAAT
NGqP200	Rp200-f	GAAGCGACCAACGCCTTGATCTG
NGqP201	Rp201-f	GAAGCGACCAACGCCTTGATCAC
NGqP202	Rp202-f	GAAGCGACCAACGCCTTGATCCT
NGqP203	Rp203-f	CGACCAACGCCTTGATCGAGG
NGqP204	Rp204-f	AAGCGACCAACGCCTTGATCGATA
NGqP205	Rp205-f	AAGCGACCAACGCCTTGATCGAAT
NGqP206	Rp206-f	ACCAACGCCTTGATCGACCCC
NGqP207	Rp207-f	CGACCAACGCCTTGATCGACCTA
NGqP208	Rp208-f	GACCAACGCCTTGATCGACCGT
NGqP209	Rp209-f	CCAACGCCTTGATCGACCAGTG
NGqP210	Rp210-f	CCAACGCCTTGATCGACCAGAC
NGqP211	Rp211-f	CCAACGCCTTGATCGACCAGCT
NGqP212	Rp212-f	CAACGCCTTGATCGACCAGGAAG
NGqP213	Rp213-f	ACGCCTTGATCGACCAGGACC
NGqP214	Rp214-f	CAACGCCTTGATCGACCAGGATA
NGqP215	Rp215-f	CGCCTTGATCGACCAGGAGTTG
NGqP216	Rp216-f	CGCCTTGATCGACCAGGAGTAC
NGqP217	Rp217-f	CGCCTTGATCGACCAGGAGTCT
NGqP218	Rp218-f	GCCTTGATCGACCAGGAGTGAAC
NGqP219	Rp219-f	GCCTTGATCGACCAGGAGTGAGA
NGqP220-2	Rp220-2f	CGCCTTGATCGACCAGGAGTGACT
NGqP221	Rp221-f	CTTGATCGACCAGGAGTGATGGG
NGqP222	Rp222-f	CCTTGATCGACCAGGAGTGATGTA
NGqP223	Rp223-f	CCTTGATCGACCAGGAGTGATGAT
NGqP224	Rp224-f	GATCGACCAGGAGTGATGCCAC
NGqP225-2	Rp225-r	GCAAGCTAGGTCTGCAGAGTGTC
NGqP226-2	Rp226-r	GCAAGCTAGGTCTGCAGAGTGAG
NGqP227	Rp227-f	GACCAGGAGTGATGCCTGGG
NGqP228	Rp228-f	TCGACCAGGAGTGATGCCTGAC
NGqP229	Rp229-f	ATCGACCAGGAGTGATGCCTGTT
NGqP230	Rp230-f	ACCAGGAGTGATGCCTGCAGG
NGqP231	Rp231-f	GACCAGGAGTGATGCCTGCAAC
NGqP232	Rp232-f	CGACCAGGAGTGATGCCTGCATA
NGqP233	Rp233-f	CAGGAGTGATGCCTGCACTGG
NGqP234	Rp234-f	ACCAGGAGTGATGCCTGCACTAC
NGqP235	Rp235-f	ACCAGGAGTGATGCCTGCACTTA
NGqP236	Rp236-f	CAGGAGTGATGCCTGCACTCTAG
NGqP237	Rp237-f	CAGGAGTGATGCCTGCACTCTTA
NGqP238	Rp238-f	CAGGAGTGATGCCTGCACTCTCT
NGqP239	Rp239-f	AGTGATGCCTGCACTCTGCCC
NGqP240	Rp240-f	GGAGTGATGCCTGCACTCTGCTA
NGqP241	Rp241-f	GAGTGATGCCTGCACTCTGCGT
NGqP242	Rp242-f	TGATGCCTGCACTCTGCAGGG
NGqP243	Rp243-f	GTGATGCCTGCACTCTGCAGCA
NGqP244	Rp244-f	AGTGATGCCTGCACTCTGCAGTT
NGqP245	Rp245-f	ATGCCTGCACTCTGCAGACGG
NGqP246	Rp246-f	GATGCCTGCACTCTGCAGACAC
NGqP247	Rp247-f	TGATGCCTGCACTCTGCAGACTA
NGqP248	Rp248-f	CCTGCACTCTGCAGACCTCC
NGqP249	Rp249-f	ATGCCTGCACTCTGCAGACCTTA
NGqP250	Rp250-f	TGCCTGCACTCTGCAGACCTGT
NGqP251	Rp251-f	CTGCACTCTGCAGACCTAGGG
NGqP252	Rp252-f	CCTGCACTCTGCAGACCTAGAC
NGqP253	Rp253-f	GCCTGCACTCTGCAGACCTAGTA
NGqP254	Rp254-f	CTGCACTCTGCAGACCTAGCTAC
NGqP255	Rp255-f	CTGCACTCTGCAGACCTAGCTGA
NGqP256	Rp256-f	CTGCACTCTGCAGACCTAGCTCT
NGqP257	Rp257-f	CACTCTGCAGACCTAGCTTGGG
NGqP258	Rp258-f	GCACTCTGCAGACCTAGCTTGAC
NGqP259	Rp259-f	TGCACTCTGCAGACCTAGCTTGTA
NGqP260	Rp260-f	CACTCTGCAGACCTAGCTTGCTAG
NGqP261	Rp261-f	CACTCTGCAGACCTAGCTTGCTTA
NGqP262	Rp262-f	CACTCTGCAGACCTAGCTTGCTCT
NGqP263	Rp263-f	CTGCAGACCTAGCTTGCTGCTG
NGqP264	Rp264-f	CTGCAGACCTAGCTTGCTGCAC
NGqP265	Rp265-f	CTGCAGACCTAGCTTGCTGCCT
NGqP266	Rp266-f	GCAGACCTAGCTTGCTGCGATC
NGqP267	Rp267-f	GCAGACCTAGCTTGCTGCGAGA
NGqP268	Rp268-f	TGCAGACCTAGCTTGCTGCGAAT
NGqP269	Rp269-f	ACCTAGCTTGCTGCGACGGG
NGqP270	Rp270-f	ACCTAGCTTGCTGCGACGCC
NGqP271	Rp271-f	CAGACCTAGCTTGCTGCGACGTT
NGqP272	Rp272-f	GACCTAGCTTGCTGCGACGAATG
NGqP273	Rp273-f	GACCTAGCTTGCTGCGACGAAAC
NGqP274	Rp274-f	GACCTAGCTTGCTGCGACGAACT
NGqP275	Rp275-f	CCTAGCTTGCTGCGACGAAGATC
NGqP276	Rp276-f	CCTAGCTTGCTGCGACGAAGAGA
NGqP277	Rp277-f	ACCTAGCTTGCTGCGACGAAGAAT
NGqP278-2	Rp278-r	CGGTCAACGATGAAGGAGTGCC
NGqP279	Rp279-f	GCTTGCTGCGACGAAGACGAC
NGqP280	Rp280-f	TAGCTTGCTGCGACGAAGACGTT
NGqP281	Rp281-f	TTGCTGCGACGAAGACGCAGG
NGqP282	Rp282-f	CTTGCTGCGACGAAGACGCAAC
NGqP283	Rp283-f	GCTTGCTGCGACGAAGACGCATT
NGqP284	Rp284-f	CTGCGACGAAGACGCACAGG
NGqP285	Rp285-f	GCTGCGACGAAGACGCACAAC
NGqP286	Rp286-f	TTGCTGCGACGAAGACGCACATA
NGqP287	Rp287-f	TGCGACGAAGACGCACACTGG
NGqP288	Rp288-f	GCTGCGACGAAGACGCACACTTA
NGqP289	Rp289-f	GCTGCGACGAAGACGCACACTAT
NGqP290	Rp290-f	GACGAAGACGCACACTCCGG
NGqP291	Rp291-f	CGACGAAGACGCACACTCCAC
NGqP292	Rp292-f	CGACGAAGACGCACACTCCCA
NGqP293	Rp293-f	GACGAAGACGCACACTCCTTGG
NGqP294	Rp294-f	CGACGAAGACGCACACTCCTTAC
NGqP295	Rp295-f	CGACGAAGACGCACACTCCTTTT
NGqP296	Rp296-f	CGAAGACGCACACTCCTTCAGG
NGqP297	Rp297-f	GACGAAGACGCACACTCCTTCACA
NGqP298	Rp298-f	GACGAAGACGCACACTCCTTCAAT
NGqP299	Rp299-f	CGAAGACGCACACTCCTTCATCAG
NGqP300	Rp300-f	GAAGACGCACACTCCTTCATCCC
NGqP301	Rp301-f	ACGAAGACGCACACTCCTTCATCTA
NGqP302	Rp302-f	AAGACGCACACTCCTTCATCGTAC
NGqP303	Rp303-f	AAGACGCACACTCCTTCATCGTGA
NGqP304	Rp304-f	AAGACGCACACTCCTTCATCGTCT
NGqP305	Rp305-f	CGCACACTCCTTCATCGTTGGG
NGqP306	Rp306-f	GACGCACACTCCTTCATCGTTGCA
NGqP307	Rp307-f	AGACGCACACTCCTTCATCGTTGTT
NGqP308	Rp308-f	CGCACACTCCTTCATCGTTGACTC
NGqP309	Rp309-f	GCACACTCCTTCATCGTTGACGA
NGqP310	Rp310-f	CGCACACTCCTTCATCGTTGACAT
NGqP311	Rp311-f	CACTCCTTCATCGTTGACCGGG
NGqP312	Rp312-f	CACACTCCTTCATCGTTGACCGTA
NGqP313	Rp313-f	CACACTCCTTCATCGTTGACCGAT
NGqP314-2	Rp314-2r	TGGAGCAAGATGGAGTCCAACTGG
NGqP315	Rp315-r	CTGGAGCAAGATGGAGTCCAACTAC
NGqP316	Rp316-r	CTGGAGCAAGATGGAGTCCAACTTT
NGqP317	Rp317-r	CTGGAGCAAGATGGAGTCCAAGG
NGqP318	Rp318-r	GCTGGAGCAAGATGGAGTCCAAAC
NGqP319	Rp319-r	TGCTGGAGCAAGATGGAGTCCAATA
NGqP320	Rp320-r	CTGGAGCAAGATGGAGTCCGG
NGqP321	Rp321-r	CTGGAGCAAGATGGAGTCCCC
NGqP322	Rp322-r	TGCTGGAGCAAGATGGAGTCCTT
NGqP323	Rp323-r	GTGCTGGAGCAAGATGGAGTGG
NGqP324	Rp324-r	CTAGTGCTGGAGCAAGATGGAGTTA
NGqP325	Rp325-r	CTAGTGCTGGAGCAAGATGGAGTAT
NGqP326	Rp326-r	TCTAGTGCTGGAGCAAGATGGAAG
NGqP327	Rp327-r	CTAGTGCTGGAGCAAGATGGACC
NGqP328	Rp328-r	CTCTAGTGCTGGAGCAAGATGGATA
NGqP329	Rp329-r	GCTCTAGTGCTGGAGCAAGATGTG
NGqP330	Rp330-r	GCTCTAGTGCTGGAGCAAGATGAC
NGqP331	Rp331-r	CTCTAGTGCTGGAGCAAGATGCT
NGqP332	Rp332-r	GATGCTCTAGTGCTGGAGCAAGAAC
NGqP333	Rp333-r	ATGCTCTAGTGCTGGAGCAAGAGA
NGqP334	Rp334-r	ATGCTCTAGTGCTGGAGCAAGACT
NGqP335	Rp335-r	GGATGCTCTAGTGCTGGAGCAATG
NGqP336	Rp336-r	GGATGCTCTAGTGCTGGAGCAAAC
NGqP337	Rp337-r	GGATGCTCTAGTGCTGGAGCAACT
NGqP338	Rp338-r	GATGCTCTAGTGCTGGAGCGG
NGqP339	Rp339-r	GATGCTCTAGTGCTGGAGCCC
NGqP340	Rp340-r	AGGATGCTCTAGTGCTGGAGCTT
NGqP341	Rp341-r	CGAGGATGCTCTAGTGCTGGAAG
NGqP342	Rp342-r	TCGAGGATGCTCTAGTGCTGGATA
NGqP343	Rp343-r	CGAGGATGCTCTAGTGCTGGACT
NGqP344	Rp344-r	GTCGAGGATGCTCTAGTGCTGTG
NGqP345	Rp345-r	GTCGAGGATGCTCTAGTGCTGAC
NGqP346	Rp346-r	GTCGAGGATGCTCTAGTGCTGCT
NGqP347	Rp347-r	GAGTCGAGGATGCTCTAGTGCAC
NGqP348	Rp348-r	GAGTCGAGGATGCTCTAGTGCGA
NGqP349	Rp349-r	GAGTCGAGGATGCTCTAGTGCCT
NGqP350	Rp350-r	CCTGAGTCGAGGATGCTCTAGTAG
NGqP351	Rp351-r	CCTGAGTCGAGGATGCTCTAGTTA
NGqP352	Rp352-r	CCTGAGTCGAGGATGCTCTAGTCT
NGqP353	Rp353-r	CACCTGAGTCGAGGATGCTCTAAG
NGqP354	Rp354-r	CCTGAGTCGAGGATGCTCTACC
NGqP355	Rp355-r	CACCTGAGTCGAGGATGCTCTATA
NGqP356	Rp356-r	ACCTGAGTCGAGGATGCTCGG
NGqP357	Rp357-r	CACCTGAGTCGAGGATGCTCAC
NGqP358	Rp358-r	CACCTGAGTCGAGGATGCTCCT
NGqP359	Rp359-r	ACACCTGAGTCGAGGATGCGG
NGqP360	Rp360-r	GACACCTGAGTCGAGGATGCCA
NGqP361	Rp361-r	CGACACCTGAGTCGAGGATGCAT
NGqP362	Rp362-r	GCGACACCTGAGTCGAGGATAG
NGqP363	Rp363-r	CTGCGACACCTGAGTCGAGGATTA
NGqP364	Rp364-r	GCGACACCTGAGTCGAGGATCT
NGqP365	Rp365-r	GCGACACCTGAGTCGAGGGG
NGqP366	Rp366-r	TGCGACACCTGAGTCGAGGTC
NGqP367	Rp367-r	TGCGACACCTGAGTCGAGGCA
NGqP368	Rp368-r	CCTGCGACACCTGAGTCGAAC
NGqP369	Rp369-r	CCTGCGACACCTGAGTCGACA
NGqP370	Rp370-r	GACCTGCGACACCTGAGTCGATT
NGqP371	Rp371-r	GACCTGCGACACCTGAGTCTG
NGqP372	Rp372-r	GACCTGCGACACCTGAGTCAC
NGqP373	Rp373-r	GACCTGCGACACCTGAGTCCT
NGqP374	Rp374-r	GGACCTGCGACACCTGAGGG
NGqP375	Rp375-r	AAGGACCTGCGACACCTGAGCA
NGqP376	Rp376-r	TAAGGACCTGCGACACCTGAGAT
NGqP377	Rp377-r	TAAGGACCTGCGACACCTGCC
NGqP378	Rp378-r	CCTAAGGACCTGCGACACCTGTA
NGqP379-2	Rp379-2r	CCTAAGGACCTGCGACACCTGGT
NGqP380	Rp380-r	TCCTAAGGACCTGCGACACCAC
NGqP381	Rp381-r	TCCTAAGGACCTGCGACACCGA
NGqP382	Rp382-r	TCCTAAGGACCTGCGACACCCT
NGqP383	Rp383-r	GTCCTAAGGACCTGCGACAGG
NGqP384	Rp384-r	ATCGTCCTAAGGACCTGCGACATA
NGqP385	Rp385-r	ATCGTCCTAAGGACCTGCGACAAT
NGqP386	Rp386-r	ATCGTCCTAAGGACCTGCGAGG
NGqP387	Rp387-r	CATCGTCCTAAGGACCTGCGAAC
NGqP388	Rp388-r	TCATCGTCCTAAGGACCTGCGATT
NGqP389	Rp389-r	GTCATCGTCCTAAGGACCTGCTG
NGqP390	Rp390-r	GTCATCGTCCTAAGGACCTGCAC
NGqP391	Rp391-r	GTCATCGTCCTAAGGACCTGCCT
NGqP392	Rp392-r	GCGTCATCGTCCTAAGGACCTAG
NGqP393	Rp393-r	AGCGTCATCGTCCTAAGGACCTTA
NGqP394	Rp394-r	GCGTCATCGTCCTAAGGACCTCT
NGqP395	Rp395-r	AGCGTCATCGTCCTAAGGACGG
NGqP396	Rp396-r	CAGCGTCATCGTCCTAAGGACAC
NGqP397	Rp397-r	CAGCGTCATCGTCCTAAGGACTA
NGqP398	Rp398-r	CAGCGTCATCGTCCTAAGGGG
NGqP399	Rp399-r	CCAGCGTCATCGTCCTAAGGCA
NGqP400	Rp400-r	ACCAGCGTCATCGTCCTAAGGTT
NGqP401	Rp401-r	GCACCAGCGTCATCGTCCTAAAC
NGqP402	Rp402-r	GCACCAGCGTCATCGTCCTAACA
NGqP403	Rp403-r	TGCACCAGCGTCATCGTCCTAATT
NGqP404	Rp404-r	CACCAGCGTCATCGTCCTGG
NGqP405	Rp405-r	CACCAGCGTCATCGTCCTCC
NGqP406	Rp406-r	GTGCACCAGCGTCATCGTCCTTT
NGqP407	Rp407-r	TGCACCAGCGTCATCGTCGG
NGqP408	Rp408-r	AGTGCACCAGCGTCATCGTCAC
NGqP409	Rp409-r	AAGTGCACCAGCGTCATCGTCTA
NGqP410	Rp410-r	AAGTGCACCAGCGTCATCGGG
NGqP411	Rp411-r	GAAGTGCACCAGCGTCATCGCA
NGqP412	Rp412-r	GGAAGTGCACCAGCGTCATCGAT
NGqP413	Rp413-r	CAGGAAGTGCACCAGCGTCATTC
NGqP414	Rp414-r	CAGGAAGTGCACCAGCGTCATGA
NGqP415	Rp415-r	TCAGGAAGTGCACCAGCGTCATAT
NGqP416	Rp416-r	AGGAAGTGCACCAGCGTCGG
NGqP417	Rp417-r	TCAGGAAGTGCACCAGCGTCTC
NGqP418	Rp418-r	TCAGGAAGTGCACCAGCGTCCA
NGqP419	Rp419-r	TCAGGAAGTGCACCAGCGGG
NGqP420	Rp420-r	GTCAGGAAGTGCACCAGCGCA
NGqP421	Rp421-r	CGTCAGGAAGTGCACCAGCGAT
NGqP422	Rp422-r	GACGTCAGGAAGTGCACCAGTC
NGqP423	Rp423-r	GACGTCAGGAAGTGCACCAGGA
NGqP424	Rp424-r	CGACGTCAGGAAGTGCACCAGAT
NGqP425	Rp425-r	GACGTCAGGAAGTGCACCCC
NGqP426	Rp426-r	AACGACGTCAGGAAGTGCACCTA
NGqP427	Rp427-r	ACGACGTCAGGAAGTGCACCGT
NGqP428	Rp428-r	CAACGACGTCAGGAAGTGCAGG
NGqP429	Rp429-r	GACAACGACGTCAGGAAGTGCATA
NGqP430	Rp430-r	GACAACGACGTCAGGAAGTGCAAT
NGqP431	Rp431-r	GACAACGACGTCAGGAAGTGGG
NGqP432	Rp432-r	CGACAACGACGTCAGGAAGTGAC
NGqP433	Rp433-r	TCGACAACGACGTCAGGAAGTGTT
NGqP434	Rp434-r	GATCGACAACGACGTCAGGAAGAC
NGqP435	Rp435-r	ATCGACAACGACGTCAGGAAGGA
NGqP436	Rp436-r	ATCGACAACGACGTCAGGAAGCT
NGqP437	Rp437-r	GATCGACAACGACGTCAGGACC
NGqP438	Rp438-r	CAGATCGACAACGACGTCAGGATA
NGqP439	Rp439-r	CAGATCGACAACGACGTCAGGAGT
NGqP440	Rp440-r	CCAGATCGACAACGACGTCAGTG
NGqP441	Rp441-r	CCAGATCGACAACGACGTCAGAC
NGqP442	Rp442-r	CCAGATCGACAACGACGTCAGCT
NGqP443	Rp443-r	TCCAGATCGACAACGACGTCCC
NGqP444	Rp444-r	CTCCAGATCGACAACGACGTCTA
NGqP445	Rp445-r	CTCCAGATCGACAACGACGTCGT
NGqP446	Rp446-r	CTCCAGATCGACAACGACGGG
NGqP447	Rp447-r	GCTCCAGATCGACAACGACGCA
NGqP448	Rp448-r	TGCTCCAGATCGACAACGACGAT
NGqP449	Rp449-r	CGTGCTCCAGATCGACAACGATC
NGqP450	Rp450-r	CGTGCTCCAGATCGACAACGAGA
NGqP451	Rp451-r	CGTGCTCCAGATCGACAACGAAT
NGqP452	Rp452-r	CCGTGCTCCAGATCGACAACTG
NGqP453	Rp453-r	CCGTGCTCCAGATCGACAACAC
NGqP454	Rp454-r	CCGTGCTCCAGATCGACAACCT
NGqP455	Rp455-r	ATCCGTGCTCCAGATCGACAGG
NGqP456	Rp456-r	CTATCCGTGCTCCAGATCGACACA
NGqP457	Rp457-r	TCTATCCGTGCTCCAGATCGACATT
NGqP458	Rp458-r	CTATCCGTGCTCCAGATCGAGG
NGqP459	Rp459-r	GTCTATCCGTGCTCCAGATCGAAC
NGqP460	Rp460-r	GTCTATCCGTGCTCCAGATCGATT
NGqP461-2	Rp461-2r	TCGTCTATCCGTGCTCCAGATCTG
NGqP462	Rp462-r	CGTCTATCCGTGCTCCAGATCAC
NGqP463	Rp463-r	CGTCTATCCGTGCTCCAGATCCT
NGqP464	Rp464-r	TCGTCTATCCGTGCTCCAGAGG
NGqP465	Rp465-r	CATCGTCTATCCGTGCTCCAGACA
NGqP466	Rp466-r	TCATCGTCTATCCGTGCTCCAGAAT
NGqP467	Rp467-f	CTTCCTGACGTCGTTGTCGAGG
NGqP468	Rp468-f	CACTTCCTGACGTCGTTGTCGACA
NGqP469-2	Rp469-r	GTCATCGTCTATCCGTGCTCCAAT
NGqP470	Rp470-f	CTTCCTGACGTCGTTGTCGATCAC
NGqP471	Rp471-f	TTCCTGACGTCGTTGTCGATCGA
NGqP472	Rp472-f	CTTCCTGACGTCGTTGTCGATCCT
NGqP473	Rp473-f	CCTGACGTCGTTGTCGATCTGTG
NGqP474-2	Rp474-r	TACGTCATCGTCTATCCGTGCGT
NGqP475	Rp475-f	CCTGACGTCGTTGTCGATCTGCT
NGqP476	Rp476-f	TGACGTCGTTGTCGATCTGGAAG
NGqP477	Rp477-f	CTGACGTCGTTGTCGATCTGGATA
NGqP478	Rp478-f	CTGACGTCGTTGTCGATCTGGACT
NGqP479	Rp479-f	GTCGTTGTCGATCTGGAGCGG
NGqP480	Rp480-f	CGTCGTTGTCGATCTGGAGCCA
NGqP481	Rp481-f	ACGTCGTTGTCGATCTGGAGCTT
NGqP482	Rp482-f	GTCGTTGTCGATCTGGAGCACAC
NGqP483	Rp483-f	GTCGTTGTCGATCTGGAGCACCA
NGqP484	Rp484-f	GTCGTTGTCGATCTGGAGCACTT
NGqP485	Rp485-f	TTGTCGATCTGGAGCACGGGG
NGqP486-2	Rp486-r	GATCTCTCACTACGTCATCGTCTGA
NGqP487	Rp487-f	GTTGTCGATCTGGAGCACGGCA
NGqP488	Rp488-f	TGTCGATCTGGAGCACGGATCC
NGqP489	Rp489-f	GTTGTCGATCTGGAGCACGGATTA
NGqP490	Rp490-f	GTTGTCGATCTGGAGCACGGATGT
NGqP491	Rp491-f	TCGATCTGGAGCACGGATAGGG
NGqP492	Rp492-f	GTCGATCTGGAGCACGGATAGCA
NGqP493	Rp493-f	TTGTCGATCTGGAGCACGGATAGTT
NGqP494	Rp494-f	CGATCTGGAGCACGGATAGACTG
NGqP495	Rp495-f	CGATCTGGAGCACGGATAGACAC
NGqP496	Rp496-f	CGATCTGGAGCACGGATAGACCT
NGqP497	Rp497-f	GATCTGGAGCACGGATAGACGAAC
NGqP498	Rp498-f	ATCTGGAGCACGGATAGACGAGA
NGqP499	Rp499-f	GATCTGGAGCACGGATAGACGACT
NGqP500	Rp500-f	GGAGCACGGATAGACGATGGG
NGqP501-2	Rp501-r	GTCAGCCACGATCTCTCACTACTG
NGqP502	Rp502-f	ATCTGGAGCACGGATAGACGATGTT
NGqP503	Rp503-f	GGAGCACGGATAGACGATGACAG
NGqP504	Rp504-f	GAGCACGGATAGACGATGACCC
NGqP505	Rp505-f	TGGAGCACGGATAGACGATGACTA
NGqP506	Rp506-f	GCACGGATAGACGATGACGTCC
NGqP507	Rp507-f	GAGCACGGATAGACGATGACGTTA
NGqP508	Rp508-f	AGCACGGATAGACGATGACGTGT
NGqP509	Rp509-f	GCACGGATAGACGATGACGTAGAC
NGqP510	Rp510-f	CACGGATAGACGATGACGTAGGA
NGqP511	Rp511-f	GCACGGATAGACGATGACGTAGCT
NGqP512	Rp512-f	CGGATAGACGATGACGTAGTGCC
NGqP513	Rp513-f	CACGGATAGACGATGACGTAGTGTA
NGqP514	Rp514-f	ACGGATAGACGATGACGTAGTGGT
NGqP515	Rp515-f	GATAGACGATGACGTAGTGAGCC
NGqP516	Rp516-f	CGGATAGACGATGACGTAGTGAGTA
NGqP517	Rp517-f	GGATAGACGATGACGTAGTGAGGT
NGqP518	Rp518-f	ATAGACGATGACGTAGTGAGAGGG
NGqP519	Rp519-f	GATAGACGATGACGTAGTGAGAGTC
NGqP520	Rp520-f	GATAGACGATGACGTAGTGAGAGCA
NGqP521	Rp521-f	GATAGACGATGACGTAGTGAGAGATTC
NGqP522	Rp522-f	GATAGACGATGACGTAGTGAGAGATGA
NGqP523	Rp523-f	GATAGACGATGACGTAGTGAGAGATAT
NGqP524	Rp524-f	ACGATGACGTAGTGAGAGATCGAC
NGqP525	Rp525-f	ACGATGACGTAGTGAGAGATCGGA
NGqP526	Rp526-f	ACGATGACGTAGTGAGAGATCGCT
NGqP527	Rp527-f	GATGACGTAGTGAGAGATCGTGAG
NGqP528	Rp528-f	CGATGACGTAGTGAGAGATCGTGTA
NGqP529	Rp529-f	GATGACGTAGTGAGAGATCGTGCT
NGqP530	Rp530-f	GACGTAGTGAGAGATCGTGGCAC
NGqP531	Rp531-f	GACGTAGTGAGAGATCGTGGCGA
NGqP532	Rp532-f	GACGTAGTGAGAGATCGTGGCCT
NGqP533	Rp533-f	GTAGTGAGAGATCGTGGCTGGG
NGqP534	Rp534-f	CGTAGTGAGAGATCGTGGCTGCA
NGqP535	Rp535-f	ACGTAGTGAGAGATCGTGGCTGTT
NGqP536	Rp536-f	TAGTGAGAGATCGTGGCTGACAG
NGqP537	Rp537-f	AGTGAGAGATCGTGGCTGACCC
NGqP538	Rp538-f	GTAGTGAGAGATCGTGGCTGACTA
NGqP539	Rp539-f	GTGAGAGATCGTGGCTGACGTTC
NGqP540	Rp540-f	GTGAGAGATCGTGGCTGACGTGA
NGqP541	Rp541-f	TAGTGAGAGATCGTGGCTGACGTAT
NGqP542	Rp542-f	AGATCGTGGCTGACGTCGGG
NGqP543	Rp543-f	GAGAGATCGTGGCTGACGTCGTA
NGqP544	Rp544-f	GAGAGATCGTGGCTGACGTCGAT
NGqP545	Rp545-f	ATCGTGGCTGACGTCGCCCC
NGqP546	Rp546-f	AGATCGTGGCTGACGTCGCCTA
NGqP547	Rp547-f	ATCGTGGCTGACGTCGCCGT
NGqP548	Rp548-f	GTGGCTGACGTCGCCAGGG
NGqP549	Rp549-f	CGTGGCTGACGTCGCCAGCA
NGqP550	Rp550-f	ATCGTGGCTGACGTCGCCAGAT
NGqP551-2	Rp551-2f	GTGGCTGACGTCGCCAGTCTG
NGqP552-2	Rp552-r	CAACTGAGTCGCAGTTGTCACGT
NGqP553	Rp553-f	TGGCTGACGTCGCCAGTCCT
NGqP554	Rp554-f	GCTGACGTCGCCAGTCGAAG
NGqP555	Rp555-f	GCTGACGTCGCCAGTCGACC
NGqP556	Rp556-f	TGGCTGACGTCGCCAGTCGATA
NGqP557	Rp557-f	CTGACGTCGCCAGTCGAGTTG
NGqP558	Rp558-f	CTGACGTCGCCAGTCGAGTAC
NGqP559	Rp559-f	CTGACGTCGCCAGTCGAGTCT
NGqP560	Rp560-f	ACGTCGCCAGTCGAGTGAGG
NGqP561	Rp561-f	TGACGTCGCCAGTCGAGTGAAC
NGqP562	Rp562-f	CTGACGTCGCCAGTCGAGTGATT
NGqP563	Rp563-f	GTCGCCAGTCGAGTGACAGG
NGqP564	Rp564-f	ACGTCGCCAGTCGAGTGACACA
NGqP565	Rp565-f	GACGTCGCCAGTCGAGTGACATT
NGqP566	Rp566-f	GTCGCCAGTCGAGTGACAACAC
NGqP567	Rp567-f	GTCGCCAGTCGAGTGACAACGA
NGqP568	Rp568-f	GTCGCCAGTCGAGTGACAACCT
NGqP569	Rp569-f	CGCCAGTCGAGTGACAACTGTC
NGqP570	Rp570-f	CGCCAGTCGAGTGACAACTGGA
NGqP571	Rp571-f	TCGCCAGTCGAGTGACAACTGAT
NGqP572	Rp572-f	CAGTCGAGTGACAACTGCGGG
NGqP573	Rp573-f	CCAGTCGAGTGACAACTGCGCA
NGqP574	Rp574-f	GCCAGTCGAGTGACAACTGCGTT
NGqP575-2	Rp575-r	CACAACTCCTCAGCGCAACTCC
NGqP576	Rp576-f	CAGTCGAGTGACAACTGCGACCA
NGqP577	Rp577-f	CAGTCGAGTGACAACTGCGACAT
NGqP578	Rp578-f	TCGAGTGACAACTGCGACTCCC
NGqP579	Rp579-f	AGTCGAGTGACAACTGCGACTCTA
NGqP580	Rp580-f	GTCGAGTGACAACTGCGACTCGT
NGqP581	Rp581-f	GAGTGACAACTGCGACTCAGGG
NGqP582	Rp582-f	CGAGTGACAACTGCGACTCAGAC
NGqP583	Rp583-f	CGAGTGACAACTGCGACTCAGCA
NGqP584	Rp584-f	GAGTGACAACTGCGACTCAGTTAG
NGqP585	Rp585-f	CGAGTGACAACTGCGACTCAGTTTA
NGqP586	Rp586-f	GAGTGACAACTGCGACTCAGTTCT
NGqP587	Rp587-f	GTGACAACTGCGACTCAGTTGCAG
NGqP588	Rp588-f	GTGACAACTGCGACTCAGTTGCTA
NGqP589	Rp589-f	GTGACAACTGCGACTCAGTTGCCT
NGqP590	Rp590-f	CAACTGCGACTCAGTTGCGCAC
NGqP591	Rp591-f	CAACTGCGACTCAGTTGCGCGA
NGqP592	Rp592-f	CAACTGCGACTCAGTTGCGCCT
NGqP593	Rp593-f	TGCGACTCAGTTGCGCTGCC
NGqP594	Rp594-f	AACTGCGACTCAGTTGCGCTGTA
NGqP595	Rp595-f	ACTGCGACTCAGTTGCGCTGGT
NGqP596	Rp596-f	GCGACTCAGTTGCGCTGAGTG
NGqP597	Rp597-f	GCGACTCAGTTGCGCTGAGAC
NGqP598	Rp598-f	GCGACTCAGTTGCGCTGAGCT
NGqP599	Rp599-f	CGACTCAGTTGCGCTGAGGAAG
NGqP600	Rp600-f	GACTCAGTTGCGCTGAGGACC
NGqP601	Rp601-f	GCGACTCAGTTGCGCTGAGGATA
NGqP602	Rp602-f	GACTCAGTTGCGCTGAGGAGTAC
NGqP603	Rp603-f	GACTCAGTTGCGCTGAGGAGTGA
NGqP604	Rp604-f	GACTCAGTTGCGCTGAGGAGTCT
NGqP605	Rp605-f	CTCAGTTGCGCTGAGGAGTTGAC
NGqP606	Rp606-f	CTCAGTTGCGCTGAGGAGTTGGA
NGqP607	Rp607-f	CTCAGTTGCGCTGAGGAGTTGCT
NGqP608	Rp608-f	GTTGCGCTGAGGAGTTGTGGG
NGqP609	Rp609-f	CAGTTGCGCTGAGGAGTTGTGAC
NGqP610	Rp610-f	TCAGTTGCGCTGAGGAGTTGTGTA
NGqP611	Rp611-f	GTTGCGCTGAGGAGTTGTGCTAC
NGqP612	Rp612-f	GTTGCGCTGAGGAGTTGTGCTGA
NGqP613	Rp613-f	GTTGCGCTGAGGAGTTGTGCTCT
NGqP614	Rp614-f	GCGCTGAGGAGTTGTGCTTGAC
NGqP615	Rp615-f	GCGCTGAGGAGTTGTGCTTGGA
NGqP616	Rp616-f	GCGCTGAGGAGTTGTGCTTGCT
NGqP617	Rp617-f	CGCTGAGGAGTTGTGCTTGTGTG
NGqP618	Rp618-f	CGCTGAGGAGTTGTGCTTGTGAC
NGqP619-2	Rp619-r	GTCAGACCTGTCGGTACTTCGAG
NGqP620	Rp620-f	GCTGAGGAGTTGTGCTTGTGGATC
NGqP621	Rp621-f	CTGAGGAGTTGTGCTTGTGGAGA
NGqP622	Rp622-f	GCTGAGGAGTTGTGCTTGTGGAAT
NGqP623	Rp623-f	GGAGTTGTGCTTGTGGACGGG
NGqP624	Rp624-f	GGAGTTGTGCTTGTGGACGCC
NGqP625	Rp625-f	TGAGGAGTTGTGCTTGTGGACGTT
NGqP626	Rp626-f	AGGAGTTGTGCTTGTGGACGAAAG
NGqP627	Rp627-f	GGAGTTGTGCTTGTGGACGAACC
NGqP628	Rp628-f	GAGGAGTTGTGCTTGTGGACGAATA

## Sheet: Table S4
for FAIRE and CHIP Qpcr or genotyping	Primer name	Sequence(5'--3')
qpr188	11228583-71F	TCCCCATTTTACAGCAGAGG
qpr189	11228583-71R	TAGGAGGCCTTTCTTTGCAA
qpr642	7153648-149F	ATTTCAGCCCAGACCATCAG
qpr643	7153648-149R	GCAGTGATACCTGGGTAGTGG
qpr278	6005451-108F	TAAGTGGGTGTCTCCCTGCT
qpr279	6005451-108R	CTGTGGGTAACTGGGGCTTA
qpr206	731174-134F	TTTGGAGACACAGCTCATGG
qpr207	731174-134R	GGCTGATGGTCTCCATTCAT
qpr314	2427345-100F	TCCTTCAGTGTGCTGTCTGC
qpr315	2427345-100R	CAGCACTGAGCCTCAAAACA
qpr638	7127900-133F	GCAAACAGCAAAGCCTCAGT
qpr639	7127900-133R	GTGCAAACAAAGGGACAGGT
qpr640	10774740-109F	GTGGTGGTGCACACCTGTAG
qpr641	10774740-109R	GGAGTGCAGTGGCATGATCT
qpr296	1866967-121F	GGCCACACAGCTAGTAATGGA
qpr297	1866967-121R	AGAACCAGATGGCTCAGCTC
qpr242	4821941-115F	GGACGGGGGTTTATTTCTTC
qpr243	4821941-115R	TGATTGCTGTTTGGGCCTAT
qpr182	5751168-150F	CATAACTTTGCTGTACTGATTGTGC
qpr183	5751168-150R	TCAACTCCAAAGCCCATGTTTC
qpr248	543686-104F	TGAAAATGGGGGATGAGAAG
qpr249	543686-104R	TGCAGAAGCCACCAGTCAT
qpr254	12198220-124F	GAGACTAGCCTGGCCAACAT
qpr255	12198220-124R	AAGGGATTCTCCTGCCTCAG
qpr170	12317459-100F	ATGTAAGGGTAACTGCTGAACAA
qpr171	12317459-100R	TCACTTCTGACTTTTATGCTCCAG
qpr302	742134-100F	GCCTGGGCAATAGAGTGAGA
qpr303	742134-100R	CAGCCTCAGTTTCCCCATCT
qpr236	12597458-144F	GGACACTGGGTCAAGGGTAG
qpr237	12597458-144R	TTGGCAAGGCCATAAGAAAA
qpr230	2523395-140F	GGATTTTGAGGCTGTCGTGT
qpr231	2523395-140R	TTGCTTTAGGCTGAGGTTGG
qpr308	4793529-144F	GGCCATTCTGGGATGTCTC
qpr309	4793529-144R	GCAAAACAGGCTAATACAGTGCT
qpr290	12480328-101F	AGAATTCAGAGAAAGCTCAATGAC
qpr291	12480328-101R	GTGAGACATTGCACCCACAC
qpr650	9649213-116F	CCTGGGTGACAGAGCAAGAC
qpr651	9649213-116R	TGGAGGCTAAAAAGTCCCTAAA
qpr284	1243647-106F	CAGTGGCTCAAGCCTGTAATC
qpr285	1243647-106R	AGACGGGGTTTCTTCATGTT
qpr320	71277158-104F	CAACAGGCAATGAACACCAG
qpr321	71277158-104R	ACTTTGGCATAACTTCCTCTTCC
qpr164	684232-146F	ATTCCTTTCCCCAAAACCACCA
qpr165	684232-146R	CTCGCGGCAGAAGGGAAAGT
qpr144	887391-133F	TCCATGGCCATGTTCATTATAAG
qpr145	887391-133R	CACGTCACCTCCCATAAAATG
qpr194	6983561-93F	CAGCAAAGCTGTCCTCACAAAC
qpr195	6983561-93R	GCATCTGCTCCAACAATGGCTA
qpr272	17765344-105F	TGCACCATATTGGAATCACC
qpr273	17765344-105R	TTCAGACAAGGAAGCCCAAA
qpr264	11704416-119F	GCGGAAGGAGTTCTTCTGTG
qpr265	11704416-119R	CAAGGCAATGGGAATTTTTG
qpr210	16867225-138F	TCACATCTGTGGCACAAACA
qpr211	16867225-138R	GTCCTACAATATCTTTTTCCATTCT
qpr48	rs339331-71f	CACTTTGCATGAACTCTCTCTCCCC
qpr49	rs339331-71r	GCAGCTTTCTGTCCTCCTAGTCAC
qpr872	10505477-142F	TGCTGCCAATTTCTTGGTAT
qpr873	10505477-142R	CCGTGGGAAACAAAGTCTTC
qpr860	11228565-107F	CTTGGAGCCAAACCTCTGAA
qpr861	11228565-107R	TGGTAACCCCTTTGTGGAGA
qpr886	887391-133F	GGGGTGTAGACCTCATGCAA
qpr887	887391-133R	ATCCAGTTAGGGAGGGGATG
qpr888	887391-116F	GAACCTGCCTCATGAGAACC
qpr889	887391-116R	CAGATGTCAGCAGCCCTCA
qpr890	887391-136F	TCCTCTAGGTGCTGTCTGGTG
qpr891	887391-136R	GAGTCATGGCAAAAAGCACA
qpr892	878391-114F	CAGGCAACAAAACCAAAAAGA
qpr893	878391-114R	CGTGGTCCATTTTCTTAGGG
qpr894	878391-123F	GCCTCCATTTCTGTGTTTCC
qpr895	878391-123R	GGAATCTGTCTGGCCACAAT
qpr896	878391-128F	TCCTGTGCCTTAACCTCCTG
qpr897	878391-128R	AGGCAAAGAGGCAGAAATCA
qpr144	887391-133F	TCCATGGCCATGTTCATTATAAG
qpr145	887391-133R	CACGTCACCTCCCATAAAATG
qpr146	887391-147F	TCTCTAGAGCAGAATCCACACCG
qpr147	887391-147R	CAGTTTTCTCTTCTGGGCTCCA
qpr148	887391-128F	ACGGGCTTGGAATACCAGC
qpr149	887391-128R	AGCCCGAAGGCTAGATTGTCT
qpr1041	11672691-112F	TCCATCAGAAAATCGACCACT
qpr1042	11672691-112R	TACGTGAAACCGACAGAACAC
qpr898	624232-106F	GGTTCCAATGATGGAGGAAA
qpr899	624232-106R	GCGAGACTCCGTGTCAAAA
qpr900	624232-127F	ACCCTTCCTGACTCCTCACA
qpr901	624232-127R	TCAAGCAGAATTCAGACATCATT
qpr902	624232-149F	CTTGCAAAGGCAAGAGTTCC
qpr903	624232-149R	GTAAAGACGGGGGTTTCACC
qpr904	624232-100F	GGTTCATGTCTTCTTGCTGGT
qpr905	624232-100R	TGCCAAAAACTGGAAAAACC
qpr906	624232-116F	CACACCCGGCTAATTTTTGT
qpr907	624232-116R	CCAGCAGTTAGGGAGGTCAA
qpr908	624232-143F	AAATGAGCTGGGCTCAAAAA
qpr909	624232-143R	GACCAACATGGACAAACCCT
qpr162	684232-127F	CAGGCGTGAGCTACTGCG
qpr163	684232-127R	CAATGGTGGACTATTCAGGACTTAG
qpr646	684232-121F	CTTGCAATTTATGATGCAGTGAG
qpr647	684232-121R	CCCCTGACCTCAAGTGATCT
qpr1001	2955626-128F	CCCCAGCACAGCAACTCC
qpr1002	2955626-128R	GCCGTGATCCCACAGTTC
qpr962	461251-198F	AGCGCGATGTAAATTCAAGC
qpr966	461251-122R	GTGTCTGCAGGAAAGGTGGT
qpr9	ChIPNeg135-f	TGCCTCAGATTTGGAGTGCT
qpr10	ChIPNeg135-r	GAGAAGCCTCTGAGGAGGGA
for AS-Qpcr	Primer name	Sequence(5'--3')
qpr1113	887391-f	AGAAAATCGACCACTTTCTCCACTAGCA
qpr1114	887391T-r	CCACGCTCTCCAGGGACGATA
qpr1115	887391C-r	CCACGCTCTCCAGGGACGATG
qpr1504	11672691G-r	CTTTACGTGAAACCGACAGAACACTC
qpr1505	11672691A-r	ATCTTTACGTGAAACCGACAGAACACTT
qpr1410	ChIPNeg110H-f	CACCACAGGGCTCACTTtcttttgcca
qpr1411	ChIPNeg110H-r	CACCTGGCAGCCACAGAGAGGTTG
qpr1529	2955626G-f	CCGCTCCGGCACTTCCGGG
qpr1530	2955626C-f	CCGCTCCGGCACTTCCGGC
qpr1531	2955626-77r	CGCCAGTCTCAGTCCGCCGTGAT
qpr1110	684232-82f	TTAAAGCCAGATGACGCAGCGCC
qpr1111	684232T-r	GACTATTCAGGACTTAGATCCCGGA
qpr1112	684232G-r	ACTATTCAGGACTTAGATCCCGGG
qpr1546	461251-158f	CCCGCGTCGATGTGGAGAGGAT
qpr1547	461251G-r	CAGTGTCTGCAGGAAAGGTGGTTC
qpr1548	461251A-r	TCAGTGTCTGCAGGAAAGGTGGTTT
for gene expression-qPCR	Primer name	Sequence(5'--3')
qpr1124	FOXA1-141-F	gcgactggaacagctactac
qpr1125	FOXA1-141-R	tcatgttgccgctcgtagtc
qpr36	AR-RT160F	ACAGAGGGAAAAAGGGCCGA
qpr37	AR-RT160R	CTTCACCGAAGAGGAAAGGGC
qpr981	VPS53-116F	GCGGAATGATGGAGGAGGAG
qpr982	VPS53-116R	TAGAGGGTCCTGGCTTGGAA
qpr987	FAM57A-136F	TCGGGGATCGTCATCATTCG
qpr988	FAM57A-136R	TTCGGCACCATTCACAGAGG
qpr1045	GEMIN4-136F	TCGCCGCCATGGACCTA
qpr1046	GEMIN4-136R	CCAACACGTTCCCAGTCAGA
qpr13	actin151RT-f	CAGCCATGTACGTTGCTATCCAGG
qpr14	actin151RT-r	AGGTCCAGACGCAGGATGGCATG
for get-PCR	Primer name	Sequence(5'--3')
qpr1373	A684232T1O4-r	TATCAGGACTTAGATCCCGGATATTC
qpr1374	G684232T1O4-r	TCAGGACTTAGATCCCGGGTATTC
qpr1375	684232-97Ctrl-f	GGTGACTGCAGCCTCCTTATGGG
qpr1376	684232-97Ctrl-r	CCGTTGCACTCCAGCCTGGGC
qpr1110	684232-82f	TTAAAGCCAGATGACGCAGCGCC
qpr1111	684232T-r	GACTATTCAGGACTTAGATCCCGGA
qpr1112	684232G-r	ACTATTCAGGACTTAGATCCCGGG

## Sheet: Table S5
Code	Primer name	Sequence(5'--3')
NGR1350	NGRlibFH-1F	ACTCTTTCCCTACACGACGCTCTTCCGATCTcgaggtcagtacagtcgttccagt
NGR1351	NGRlibFH-2F	ACTCTTTCCCTACACGACGCTCTTCCGATCTgcgaggtcagtacagtcgttccagt
NGR1352	NGRlibFH-3F	ACTCTTTCCCTACACGACGCTCTTCCGATCTtgcgaggtcagtacagtcgttccagt
NGR1353	NGRlibFH-4F	ACTCTTTCCCTACACGACGCTCTTCCGATCTgtgcgaggtcagtacagtcgttcca
NGR1354	NGRlibFH-5F	ACTCTTTCCCTACACGACGCTCTTCCGATCTcgtgcgaggtcagtacagtcgttcca
NGR1355	NGRlibFH-6F	ACTCTTTCCCTACACGACGCTCTTCCGATCTccgtgcgaggtcagtacagtcgttcca
NGR1356	NGRlibFH-7F	ACTCTTTCCCTACACGACGCTCTTCCGATCTaccgtgcgaggtcagtacagtcgttc
NGR1357	NGRlibFH-8F	ACTCTTTCCCTACACGACGCTCTTCCGATCTgaccgtgcgaggtcagtacagtcgttc
NGR1358	NGRlibFH-9F	ACTCTTTCCCTACACGACGCTCTTCCGATCTtgaccgtgcgaggtcagtacagtcgtt
NGR1359	NGRlibFH-10F	ACTCTTTCCCTACACGACGCTCTTCCGATCTgtgaccgtgcgaggtcagtacagtcgtt
NGR1360	NGRlibFH-3R	GTGACTGGAGTTCAGACGTGTGCTCTTCCGATCTtcacctggtagcctcaggactcagt
NGR1361	NGRlibFH-4R	GTGACTGGAGTTCAGACGTGTGCTCTTCCGATCTcacctggtagcctcaggactcagtc
NGR1362	NGRlibFH-5R	GTGACTGGAGTTCAGACGTGTGCTCTTCCGATCTacctggtagcctcaggactcagtca
NGR1363	NGRlibFH-6R	GTGACTGGAGTTCAGACGTGTGCTCTTCCGATCTcctggtagcctcaggactcagtcag
NGR1364	NGRlibFH-7R	GTGACTGGAGTTCAGACGTGTGCTCTTCCGATCTctggtagcctcaggactcagtcaga
NGR1365	NGRlibFH-8R	GTGACTGGAGTTCAGACGTGTGCTCTTCCGATCTtggtagcctcaggactcagtcagag
NGR1366	NGRlibFH-9R	GTGACTGGAGTTCAGACGTGTGCTCTTCCGATCTggtagcctcaggactcagtcagaga
NGR1367	NGRlibFH-10R	GTGACTGGAGTTCAGACGTGTGCTCTTCCGATCTgtagcctcaggactcagtcagagac
NGR1368	NGRlibFH-11R	GTGACTGGAGTTCAGACGTGTGCTCTTCCGATCTtagcctcaggactcagtcagagact
NGR1369	NGRlibFH-12R	GTGACTGGAGTTCAGACGTGTGCTCTTCCGATCTagcctcaggactcagtcagagactt
NGR1370	NGRlibLH-1F	ACTCTTTCCCTACACGACGCTCTTCCGATCTcctgaggctaccaggtgactagtg
NGR1371	NGRlibLH-2F	ACTCTTTCCCTACACGACGCTCTTCCGATCTtcctgaggctaccaggtgactagtg
NGR1372	NGRlibLH-3F	ACTCTTTCCCTACACGACGCTCTTCCGATCTgtcctgaggctaccaggtgactagtg
NGR1373	NGRlibLH-4F	ACTCTTTCCCTACACGACGCTCTTCCGATCTagtcctgaggctaccaggtgacta
NGR1374	NGRlibLH-5F	ACTCTTTCCCTACACGACGCTCTTCCGATCTgagtcctgaggctaccaggtgacta
NGR1375	NGRlibLH-6F	ACTCTTTCCCTACACGACGCTCTTCCGATCTtgagtcctgaggctaccaggtgacta
NGR1376	NGRlibLH-7F	ACTCTTTCCCTACACGACGCTCTTCCGATCTctgagtcctgaggctaccaggtgacta
NGR1377	NGRlibLH-8F	ACTCTTTCCCTACACGACGCTCTTCCGATCTactgagtcctgaggctaccaggtga
NGR1378	NGRlibLH-9F	ACTCTTTCCCTACACGACGCTCTTCCGATCTgactgagtcctgaggctaccaggtga
NGR1379	NGRlibLH-10F	ACTCTTTCCCTACACGACGCTCTTCCGATCTtgactgagtcctgaggctaccaggtga
NGR1380	NGRlibLH-1R	GTGACTGGAGTTCAGACGTGTGCTCTTCCGATCTgtcttgcgtcgagtgtctcggtcag
NGR1381	NGRlibLH-2R	GTGACTGGAGTTCAGACGTGTGCTCTTCCGATCTtcttgcgtcgagtgtctcggtcaga
NGR1382	NGRlibLH-3R	GTGACTGGAGTTCAGACGTGTGCTCTTCCGATCTcttgcgtcgagtgtctcggtcagac
NGR1383	NGRlibLH-4R	GTGACTGGAGTTCAGACGTGTGCTCTTCCGATCTttgcgtcgagtgtctcggtcagacc
NGR1384	NGRlibLH-5R	GTGACTGGAGTTCAGACGTGTGCTCTTCCGATCTtgcgtcgagtgtctcggtcagacct
NGR1385	NGRlibLH-6R	GTGACTGGAGTTCAGACGTGTGCTCTTCCGATCTgcgtcgagtgtctcggtcagacctg
NGR1386	NGRlibLH-7R	GTGACTGGAGTTCAGACGTGTGCTCTTCCGATCTcgtcgagtgtctcggtcagacctgt
NGR1387	NGRlibLH-8R	GTGACTGGAGTTCAGACGTGTGCTCTTCCGATCTgtcgagtgtctcggtcagacctgtc
NGR1388	NGRlibLH-9R	GTGACTGGAGTTCAGACGTGTGCTCTTCCGATCTtcgagtgtctcggtcagacctgtcg
NGR1389	NGRlibLH-10R	GTGACTGGAGTTCAGACGTGTGCTCTTCCGATCTcgagtgtctcggtcagacctgtcg
NGR1390	NGRlibFH-11F	ACTCTTTCCCTACACGACGCTCTTCCGATCTagtgaccgtgcgaggtcagtacagtc
NGR1391	NGRlibFH-12F	ACTCTTTCCCTACACGACGCTCTTCCGATCTgagtgaccgtgcgaggtcagtacagtc
NGR1392	NGRlibFH-1R	GTGACTGGAGTTCAGACGTGTGCTCTTCCGATCTagtcacctggtagcctcaggactca
NGR1393	NGRlibFH-2R	GTGACTGGAGTTCAGACGTGTGCTCTTCCGATCTgtcacctggtagcctcaggactcag
NGR1394	NGRlibLH-11F	ACTCTTTCCCTACACGACGCTCTTCCGATCTctgactgagtcctgaggctaccaggt
NGR1395	NGRlibLH-12F	ACTCTTTCCCTACACGACGCTCTTCCGATCTtctgactgagtcctgaggctaccaggt
NGR1396	NGRlibLH-11R	GTGACTGGAGTTCAGACGTGTGCTCTTCCGATCTgagtgtctcggtcagacctgtcgg
NGR1397	NGRlibLH-12R	GTGACTGGAGTTCAGACGTGTGCTCTTCCGATCTagtgtctcggtcagacctgtcgg
NGR1327	libUni-F	AATGATACGGCGACCACCGAGATCTACACACACTCTTTCCCTACACGACGCTCTTCCGA
NGR1328	libUni-D701-R	CAAGCAGAAGACGGCATACGAGATCGAGTAATGTGACTGGAGTTCAGACGTGTGCTCTT
NGR1329	libUni-D702-R	CAAGCAGAAGACGGCATACGAGATTCTCCGGAGTGACTGGAGTTCAGACGTGTGCTCTT
NGR1330	libUni-D703-R	CAAGCAGAAGACGGCATACGAGATAATGAGCGGTGACTGGAGTTCAGACGTGTGCTCTT
NGR1331	libUni-D704-R	CAAGCAGAAGACGGCATACGAGATGGAATCTCGTGACTGGAGTTCAGACGTGTGCTCTT
NGR1332	libUni-D705-R	CAAGCAGAAGACGGCATACGAGATTTCTGAATGTGACTGGAGTTCAGACGTGTGCTCTT
NGR1333	libUni-D706-R	CAAGCAGAAGACGGCATACGAGATACGAATTCGTGACTGGAGTTCAGACGTGTGCTCTT
NGR1334	libUni-D707-R	CAAGCAGAAGACGGCATACGAGATAGCTTCAGGTGACTGGAGTTCAGACGTGTGCTCTT
NGR1335	libUni-D708-R	CAAGCAGAAGACGGCATACGAGATGCGCATTAGTGACTGGAGTTCAGACGTGTGCTCTT
NGR1336	libUni-D709-R	CAAGCAGAAGACGGCATACGAGATCATAGCCGGTGACTGGAGTTCAGACGTGTGCTCTT
NGR1337	libUni-D710-R	CAAGCAGAAGACGGCATACGAGATTTCGCGGAGTGACTGGAGTTCAGACGTGTGCTCTT
NGR1338	libUni-D711-R	CAAGCAGAAGACGGCATACGAGATGCGCGAGAGTGACTGGAGTTCAGACGTGTGCTCTT
NGR1339	libUni-D712-R	CAAGCAGAAGACGGCATACGAGATCTATCGCTGTGACTGGAGTTCAGACGTGTGCTCTT

## Sheet: Table S6
22RV1
rs10774740
rs10875943
rs11228583
rs11605083
rs11704416
rs12480328
rs12597458
rs12653946
rs13264970
rs1447295
rs16867225
rs17181170
rs17765344
rs1866967
rs2292884
rs2427345
rs2523395
rs3123078
rs543686
rs5751168
rs5759167
rs5945572
rs5945619
rs6005451
rs684232
rs6983561
rs71277158
rs7141529
rs7153648
rs731174
rs887391
rs9649213

## Sheet: Table S7
sgRNA-primers	Primer name	Sequence(5'--3')
CRpr1799	C-T-684232T2-F	CACCGTTTACTGAGGCTGAATATCC
CRpr1800	C-T-684232T2-R	AAACGGATATTCAGCCTCAGTAAAC
CRpr1801	C-C-684232T2-F	CACCGTTTACTGAGGCTGAATACCC
CRpr1802	C-C-684232T2-R	AAACGGGTATTCAGCCTCAGTAAAC
gDNA and cDNA genotyping primers	Primer name	Sequence(5'--3')
qpr116	887391-388F	AGCGATTAAGGGTCTCGT
qpr117	887391-388R	TGTTCTCCTGGGTCAAGTT
qpr108	684232-456-F	GATTCTCCTGTCTCAGCCTCC
qpr109	684232-456-R	GGTGATCGGTGATCTGGCTT
GNT219	VPS53-911R	caaccagacatgcatctcgt
GNT220	VPS53-923R	tcagtcctccactgctggtt
GNT221	VPS53-972R	ctcttcagccccttcatgtc
GNT222	VPS53-1260R	agacagggtttcgccatgt
GNT223	VPS53-900R	ctcaatgctgtgatggagcc
GNT224	VPS53-1065R	aacagggaaccaggtctcct
GNT225	VPS53-998R	aaaagccagtccaggcaag
GNT226	VPS53-1583R	cctaagataccacatgcaggc
GNT270	FAM57Aexon1-209-R	ctgatcatcacgcagtcggt
GNT271	FAM57Aexon3-242-F	ccacaatgatttcacgggcc
GNT272	FAM57Aexon3-242-R	ctgtgcgactggcacaagga
GNT273	FAM57Aexon4-1668-F	ctaaagcagcagcacaccct
GNT163	GEMIN4-3947F	aggcctaagcgcggccgc
GNT164	GEMIN4-3947R	atgctttttccactcacatgg
GNT165	GEMIN4-948F	gcaaccgtgtatctggacaa
GNT166	GEMIN4-2032F	gtcatagtgcacccggaagt
GNT143	VPS53-3360F	agcggctgacagagcggc
qpr164	684232-146F	ATTCCTTTCCCCAAAACCACCA
qpr984	VPS53-105R	GGGTCCTGGCTTGGAAACAC
qpr1100	FAM57Aexon4-960-F	acatctgcctgtccctgtat
qpr1101	FAM57Aexon4-960-R	tggcacccattaaagactca
GNT165	GEMIN4-948F	gcaaccgtgtatctggacaa
GNT164	GEMIN4-3947R	atgctttttccactcacatgg
cloning primers	Primer name	Sequence(5'--3')
Clopr445	887391-766F	GATAGGTACCGAGCTCAACCCAGCGATTAAGGGTCT
Clopr446	887391-766R	TCGCAGATCTCGAGCCCCTCCCTGTCTGCCCAAAATA
Clopr459	T887391C-F	CGTAAAGATATATAATGGCATCGTCCCTGGAGAGC
Clopr460	T887391C-R	GCTCTCCAGGGACGATGCCATTATATATCTTTACG
Clopr169	11672691-1031F	GATAGGTACCGAGCTCGCTTTTCTTCCCCGAGGAAA
Clopr170	11672691-1031R	TCGCAGATCTCGAGCCCACTCCCACCTTTCCTGGTTT
SMG89	G11672691A-F	AGCTCACAAAAAGTGTAATAAGTGTTCTGTCGGTTTCAC
SMG90	G11672691A-R	GTGAAACCGACAGAACACTTATTACACTTTTTGTGAGCT
Clopr447	684232-852F	GATAGGTACCGAGCTCCCCGAGTAGCTGGGATTACA
Clopr448	684232-852R	TCGCAGATCTCGAGCCCATCCTCAGTGGTGGGATGAG
Clopr461	C684232T-F	CGTTTACTGAGGTTGAATATCCGGGATCTAAGTCCTGA
Clopr462	C684232T-R	TCAGGACTTAGATCCCGGATATTCAACCTCAGTAAACG
Clopr613	2955626-835-F	GATAGGTACCGAGCTCCCTCCACTTTCCCTTCTGCC
Clopr614	2955626-835-R	TCGCAGATCTCGAGCCCGAGGCTGCAGTCACCTCGAA
SMG139	G461251A-F	TCACCGATCACCCTGTGAAACCACCTTTCCTGCAG
SMG140	G461251A-R	CTGCAGGAAAGGTGGTTTCACAGGGTGATCGGTGA
shRNA target sequence			vector	FastDigest Enzyme	choosen the one with high knocked down efficency
FOXA1-shRNA1	GAACACCTACATGACCATGAA		pLKO.1	EcoRI;BshTI
FOXA1-shRNA2	GAACTCCATGAACACCTACAT		pLKO.1	EcoRI;BshTI	choosen
VPS53-shRNA1	GATGCATGTCTGGTTGCTAAT		pLKO.1	EcoRI;BshTI	choosen
VPS53-shRNA2	GAAAGAAATCACCCGTGATAT		pLKO.1	EcoRI;BshTI
FAM57A-shRNA1	CCCTTCTGTACAAGGTGAATG		pLKO.1	EcoRI;BshTI
FAM57A-shRNA2	GTGGTTTCTGATTCCATACAT		pLKO.1	EcoRI;BshTI	choosen
GEMIN4-shRNA1	GCAACCGTGTATCTGGACAAA		pLKO.1	EcoRI;BshTI
GEMIN4-shRNA2	GCACTGGCAGAATTAACAAAG		pLKO.1	EcoRI;BshTI	choosen
